# Supplementary material for: Guanxinning attenuates diabetic myocardial ischemia–reperfusion injury by targeting oral Fusobacterium nucleatum and modulating PTEN signaling
Source: Front Pharmacol. 2025 Jun 19;16:1581413. doi: 10.3389/fphar.2025.1581413 (PMC12223323; doi:10.3389/fphar.2025.1581413)
Supplement: Supplementary file 3 [file Table1.XLSX]

## Sheet: Sheet1
Index	Compounds	Class	Q1 (Da)	Q3 (Da)	Molecular Weight	Ion mode	Ionization model	Formula	1	2	3	4	5	6	7	8	9	10	11	12	13	14	15	16	17	MWY245083a_R1	MWY245083a_R2	MWY245083a_R3	cpd_ID	HMDB	CAS	kegg_map
Potassium-Phenyl-Sulfate	Potassium Phenyl Sulfate	Sulfonic acids	172.9924	93.0378	173.99	Negative	[M-H]-	C6H5KO4S	993.846	1645.986	451.2204	681.258	106.5264	1702.482	225.3366	424.3122	129.1182	900.558	3365.886	958.806	2153.52	4483.68	1873.23	1307.13	2456.04	1226.214	1199.886	1211.652	-	-	1733-88-6	-
2'-deoxycytidine	2'-deoxycytidine	Nucleotide and Its metabolomics	228.3	112.1	227.090607	Positive	[M+H]+	C9H13N3O4	2903.046	2285.022	3026.808	2454.87	2395.14	2564.964	2310.612	2582.874	1914.15	2332.092	4190.238	2578.332	2990.22	2838.114	1964.286	2779.848	1995.378	2944.926	2393.448	2228.676	C00881	HMDB0000014	951-77-9	ko00240,ko01100,ko01232,ko02010
Adenosine	Adenosine	Nucleotide and Its metabolomics	268.1	136.1	267.096755	Positive	[M+H]+	C10H13N5O4	3.929142	2.6967	3.729588	4.451778	3.998682	4.812084	3.680772	5.565648	3.838956	6.13536	4.993452	4.599522	4.963854	5.80923	6.31404	4.584792	5.231904	4.165032	4.29753	3.857706	C00212	HMDB0000050	58-61-7	ko00230,ko01100,ko01232,ko02010,ko04022,ko04024,ko04071,ko04080,ko04270,ko04923,ko04924,ko05012,ko05032,ko05034
Thymidine	Thymidine	Nucleotide and Its metabolomics	241.08	41.8	242.090273	Negative	[M-H]-	C10H14N2O5	339.0738	310.5006	298.1928	256.3194	246.1368	355.1346	358.2342	433.1214	318.4686	555.7746	746.67	403.6002	658.464	472.404	287.2452	410.3028	394.8636	340.0434	389.7114	320.5452	C00214	HMDB0000273	50-89-5	ko00240,ko01100,ko01232
N2,N2,7-trimethylguanosine	N2,N2,7-trimethylguanosine	Nucleotide and Its metabolomics	326.1	194.1	325.13862	Positive	[M+H]+	C13H19N5O5	0.949494	1.02495	1.716924	0.972828	0.993924	1.020354	1.014066	1.54368	1.031688	1.153434	2.726244	1.502532	1.927638	1.645392	1.320954	1.13709	0.893634	0.949704	1.06557	0.975096	-	-	40027-70-1	-
5'-Deoxy-5'-methylthioadensine	5'-Deoxy-5'-methylthioadensine	Nucleotide and Its metabolomics	298.1	136.1	297.08956	Positive	[M+H]+	C11H15N5O3S	25.99086	28.50732	33.02874	34.53858	41.86518	26.1084	25.55406	22.50606	22.57362	19.8927	27.24774	25.85742	16.89462	18.40248	20.59998	18.4038	25.25028	22.16628	23.18616	24.88704	C00170	HMDB0001173	2457-80-9	ko00270,ko01100
N2-methylguanosine	N2-methylguanosine	Nucleotide and Its metabolomics	298.1	166.1	297.10732	Positive	[M+H]+	C11H15N5O5	39.0132	20.80242	44.91936	23.53626	28.062	22.71726	21.36264	20.99034	18.987	29.6544	44.77296	24.8181	28.76166	25.33842	17.32194	20.84568	12.20436	31.87032	20.31774	20.99454	-	HMDB0005862	2140-77-4	-
2'-O-methylcytidine	2'-O-methylcytidine	Nucleotide and Its metabolomics	258.1	112.1	257.101172	Positive	[M+H]+	C10H15N3O5	76.6854	75.5424	99.9498	80.0934	68.7072	86.2974	102.8442	121.908	102.3918	120.2304	133.9782	98.3406	98.2938	77.5356	82.1586	113.1294	98.7606	101.7834	85.1028	85.3584	-	-	2140-72-9	-
2'-O-methylguanosine	2'-O-methylguanosine	Nucleotide and Its metabolomics	298.1	152.1	297.10732	Positive	[M+H]+	C11H15N5O5	19.2156	26.57088	41.38788	25.62786	25.30278	33.01608	61.6638	69.5676	49.3623	76.5714	142.3152	58.87704	57.3573	56.19192	45.32646	60.0492	48.62424	38.02278	41.15136	41.5263	-	-	2140-71-8	-
1-methylguanosine	1-methylguanosine	Nucleotide and Its metabolomics	298.1	166.1	297.10732	Positive	[M+H]+	C11H15N5O5	47.52546	27.70152	47.9151	28.82268	28.05012	36.31728	21.34782	19.4505	23.34366	43.38138	42.03144	26.7984	36.17628	31.7772	22.37154	27.6102	20.24988	43.33008	29.35986	27.44244	C04545	HMDB0001563	2140-65-0	-
ATP	ATP	Nucleotide and Its metabolomics	506	78.9	506.995751	Negative	[M-H]-	C10H16N5O13P3	12679.68	2033.13	5426.256	4565.22	4102.236	2674.302	4001.802	2100.42	2643.402	1205.346	4858.284	3918.942	3122.754	3930.924	1455.99	3396.45	2143.296	N/A	N/A	N/A	-	HMDB0000538	56-65-5	-
Guanine	Guanine	Nucleotide and Its metabolomics	152.057	135.0298	151.04941	Positive	[M+H]+	C5H5N5O	55.41534	80.6352	96.4974	67.3062	64.3842	75.8592	76.9848	84.1602	54.24234	91.575	102.252	110.9844	125.4558	77.9268	53.47536	61.1856	97.5312	59.54814	59.92434	60.2838	C00242	HMDB0000132	73-40-5	ko00230,ko01100,ko01232
1-methylinosine	1-methylinosine	Nucleotide and Its metabolomics	283.1	151	282.096421	Positive	[M+H]+	C11H14N4O5	132.1902	111.9876	106.6884	107.1612	108.774	95.8182	123.5022	134.5038	134.0454	127.458	145.8708	88.4616	97.3866	97.8372	104.7102	98.8272	74.589	139.59	117.0678	113.307	-	HMDB0002721	2140-73-0	-
5'-Cytidylic-acid	5'-Cytidylic acid	Nucleotide and Its metabolomics	324.05	112	323.051854	Positive	[M+H]+	C9H14N3O8P	42.66342	54.5493	66.7776	46.25262	53.508	49.67058	51.59292	63.3636	70.1364	61.6728	136.5588	65.2446	105.2892	86.202	55.4052	40.97616	46.44432	41.74422	51.3282	45.29574	C00055	HMDB0000095	63-37-6	ko00240,ko01100,ko01232
Pseudouridine	Pseudouridine	Nucleotide and Its metabolomics	245.07	209	244.069538	Positive	[M+H]+	C9H12N2O6	1700.208	1231.524	1969.098	1265.538	1243.416	1324.314	1220.04	1238.55	1020.732	1067.85	2143.932	1226.97	1293.852	1453.734	1238.64	1264.74	936.024	1440.714	1090.464	1373.904	C02067	HMDB0000767	1445-07-4	ko00240,ko01100
Uridine	Uridine	Nucleotide and Its metabolomics	243.06	82.03	244.069538	Negative	[M-H]-	C9H12N2O6	215.5278	212.6922	91.7886	178.602	217.0506	270.7314	183.1812	334.3296	149.2356	194.0154	96.3414	395.964	369.3372	257.841	109.7796	172.2084	254.121	227.889	240.615	309.0558	C00299	HMDB0000296	58-96-8	ko00240,ko01100,ko01232,ko02010
S-adenosyl-L-methioninate	S-adenosyl-L-methioninate	Nucleotide and Its metabolomics	399.1	136.1	398.137239	Positive	[M+H]+	C15H22N6O5S	89.9724	84.8304	90.8994	86.859	86.2824	90.495	81.5004	82.3122	82.914	87.768	104.976	90.321	96.5292	97.5858	92.1516	87.7482	84.381	95.1066	90.1158	88.4538	C00019	HMDB0001185	29908-03-0	ko00270,ko00330,ko01100,ko01230,ko01240,ko04122,ko04148,ko05208
Deoxyuridine	Deoxyuridine	Nucleotide and Its metabolomics	227.1	94	228.074623	Negative	[M-H]-	C9H12N2O5	377.5074	440.865	219.7056	379.5684	413.1912	389.4396	379.7898	561.0102	438.8322	723.228	354.4656	446.2536	349.5198	199.086	482.8656	450.3858	492.717	465.6174	411.3954	484.4892	C00526	HMDB0000012	951-78-0	ko00240,ko01100,ko01232,ko02010
1-octadecylglycero-3-phosphocholine	1-octadecylglycero-3-phosphocholine	LPC	510.3	104.1	509.384526	Positive	[M+H]+	C26H56NO6P	1394.58	1484.142	1858.518	1537.548	1623.96	1877.592	1719.378	1707.606	1846.242	1807.296	1932.21	2347.188	2175.204	2226.174	1580.544	1710.276	1782.906	1609.29	1658.76	1662.72	C04317	HMDB0011149	74430-89-0	ko00565,ko01100
1-docosahexaenoyl-glycero-3-phosphocholine	1-docosahexaenoyl-glycero-3-phosphocholine	LPC	568.33977	184.07	567.332491	Positive	[M+H]+	C30H50NO7P	1381434	1481832	1467264	1466586	986934	1351746	1281222	1394340	1351050	1442424	1393848	1317876	1274214	1457334	1208880	1313196	1342296	1432314	1316652	1325712	-	HMDB0010404	162440-05-3	-
1-(9Z-hexadecenoyl)-sn-glycero-3-phosphocholine	1-(9Z-hexadecenoyl)-sn-glycero-3-phosphocholine	LPC	494.32412	184.07	493.316841	Positive	[M+H]+	C24H48NO7P	2783.772	4089.882	4454.172	3847.338	3754.296	3966.984	3682.5	4471.644	4367.352	4477.704	4775.97	4881.384	4267.854	4785.966	3810.894	4598.868	4472.916	3988.086	3837.03	3840.738	-	HMDB0010383	76790-27-7	-
1-Stearoyl-sn-glycero-3-phosphocholine	1-Stearoyl-sn-glycero-3-phosphocholine	LPC	524.37	184.07	523.363791	Positive	[M+H]+	C26H54NO7P	45086.7	45825.18	51199.14	44904.18	47576.94	43072.8	48208.74	50410.56	48561.12	47945.76	51638.34	49672.32	46464.18	51485.04	39468.24	47054.52	43566.12	47449.62	44744.52	44938.26	C04230	HMDB0010384	19420-57-6	ko00564,ko04148,ko05231
1-Oleoyl-sn-glycero-3-phosphocholine	1-Oleoyl-sn-glycero-3-phosphocholine	LPC	522.35542	184.0731	521.348141	Positive	[M+H]+	C26H52NO7P	3515.844	4160.436	4208.022	4385.382	4326.804	3628.536	3585.354	4138.41	3725.808	4620.498	4324.926	4299.834	3538.734	4192.836	3789.168	4404.75	4277.256	4417.626	4590.78	4123.284	-	HMDB0002815	19420-56-5	-
1-O-Hexadecyl-lyso-sn-glycero-3-phosphocholine	1-O-Hexadecyl-lyso-sn-glycero-3-phosphocholine	LPC	482.3605	104.1073	481.353226	Positive	[M+H]+	C24H52NO6P	494.6742	550.9836	481.7544	494.4786	525.2718	518.6778	781.044	708.714	714.798	619.788	509.9238	692.304	537.573	488.5854	667.686	564.2298	657.492	625.668	646.968	583.4802	-	-	52691-62-0	-
2-aminobenzoic-acid	2-aminobenzoic acid	Benzene and substituted derivatives	138	120.1	137.047679	Positive	[M+H]+	C7H7NO2	6.0999	6.24336	8.02956	6.00576	3.851736	8.0931	4.620066	5.378118	4.361898	7.71966	7.45746	9.01272	12.96054	8.89674	5.189292	6.43494	10.69434	4.90986	4.518756	5.509836	C00108	HMDB0001123	118-92-3	ko00380,ko00400,ko01100,ko01230
1-pentadecanoyl-sn-glycero-3-phosphocholine	1-pentadecanoyl-sn-glycero-3-phosphocholine	LPC	482.32412	184.0737	481.316841	Positive	[M+H]+	C23H48NO7P	452.7996	503.58	621.996	532.5702	572.2662	626.172	573.7146	565.2552	656.97	638.754	554.133	890.244	553.1868	564.261	420.2544	528.435	746.922	572.2962	556.8144	529.569	-	-	108273-89-8	-
1-hexadecanoyl-sn-glycero-3-phosphoethanolamine	1-hexadecanoyl-sn-glycero-3-phosphoethanolamine	LPE	454.29336	313.286	453.285541	Positive	[M+H]+	C21H44NO7P	1738.788	1783.152	1426.332	1696.128	1873.254	1691.01	1756.44	1799.742	1816.818	1945.338	1090.47	1399.818	952.374	949.41	1662.624	1694.064	1717.56	1871.136	1725.45	1766.592	-	HMDB0011503	53862-35-4	-
Hippuric-acid	Hippuric acid	Benzene and substituted derivatives	178.05	134.06	179.058244	Negative	[M-H]-	C9H9NO3	221.9454	188.5836	191.4594	393.7368	308.1846	285.8574	360.6672	307.17	176.8182	827.184	289.7712	548.3736	606.882	210.9474	399.1284	176.6418	370.446	354.8814	321.8034	335.1558	C01586	HMDB0000714	495-69-2	-
1-octadecanoyl-sn-glycero-3-phosphoethanolamine	1-octadecanoyl-sn-glycero-3-phosphoethanolamine	LPE	480.30956	283.2723	481.316841	Negative	[M-H]-	C23H48NO7P	2696.874	2446.68	1132.044	2357.982	2732.478	2232.96	2617.836	2759.322	2710.638	2842.794	545.2464	1260	409.6038	493.0134	1842.75	1568.7	2489.886	2623.818	2705.274	2497.758	-	-	97281-40-8	-
Cytidine	Cytidine	Nucleotide and Its metabolomics	244.093	112.05	243.085522	Positive	[M+H]+	C9H13N3O5	3553.47	3229.332	4743.498	2808.252	3036.444	3188.058	2666.58	3172.362	3001.74	2748.36	4198.938	3152.58	3609.834	3465.198	1787.94	3068.67	2493.552	3583.176	2981.598	2960.574	C00475	HMDB0000089	65-46-3	ko00240,ko01100,ko01232,ko02010
N6-methyladenosine	N6-methyladenosine	Nucleotide and Its metabolomics	282.12	150.08	281.112405	Positive	[M+H]+	C11H15N5O4	1.378026	2.264016	2.464362	1.870542	1.436532	0.844176	1.056372	1.615974	1.491078	1.723164	1.234002	1.794702	2.770578	2.889312	1.057488	2.316234	1.559076	0.861636	1.166646	1.113648	-	HMDB0004044	1867-73-8	-
N,N-Dimethylguanosine	N,N-Dimethylguanosine	Nucleotide and Its metabolomics	312.1	180	311.12297	Positive	[M+H]+	C12H17N5O5	6.63954	8.08734	10.2477	7.0758	7.10676	7.87542	12.01512	13.17504	12.26232	14.03064	19.81854	10.80228	13.85478	9.91026	9.7632	12.14796	9.98604	9.3654	8.69424	8.7393	-	HMDB0004824	2140-67-2	-
Phosphorylethanolamine	Phosphorylethanolamine	LPE	139.8	78.9	141.019096	Negative	[M-H]-	C2H8NO4P	1454.1	1911.948	2577.354	1558.422	1920.732	1791.354	1560.822	1774.398	1821.342	2424.144	2858.436	2217.432	2830.866	2900.346	1538.736	1683.234	1740.378	2506.428	1779.102	1577.958	C00346	HMDB0000224	1071-23-4	ko00563,ko00564,ko00600,ko01100,ko04071
4-hydroxyhippuric-acid	4-hydroxyhippuric acid	Benzene and substituted derivatives	196.1	121	195.053159	Positive	[M+H]+	C9H9NO4	50.06406	36.7773	18.72066	26.57952	21.45108	30.21876	36.08382	52.89756	73.1256	22.79826	19.42212	26.54652	24.18438	22.56762	21.91272	17.92044	37.56438	33.23274	35.2716	30.03042	-	HMDB0013678	2482-25-9	-
FAD	FAD	Nucleotide and Its metabolomics	786.16	348.07	785.15714	Positive	[M+H]+	C27H33N9O15P2	889.218	849.09	962.898	869.688	888.414	898.062	946.356	929.262	931.626	941.826	1025.946	939.288	988.206	992.598	857.718	845.052	868.638	908.238	902.964	886.17	-	HMDB0001248	146-14-5	-
Isocytosine	Isocytosine	Nucleotide and Its metabolomics	112	95	111.043262	Positive	[M+H]+	C4H5N3O	139.191	112.2612	221.7372	116.58	114.1284	131.3478	119.9202	104.3772	107.1906	113.8932	241.7832	120.9228	207.3456	134.3388	113.9586	136.5366	103.269	140.4846	132.4092	110.2128	-	-	108-53-2	-
Niacinamide	Niacinamide	CoEnzyme and vitamins	123.06	80.05	122.048013	Positive	[M+H]+	C6H6N2O	364.3092	893.892	799.938	522.8796	660.072	971.136	818.184	993.138	819.096	1149.078	1010.112	1226.928	944.172	959.382	1069.206	872.082	977.604	865.848	930.282	871.656	C00153	HMDB0001406	98-92-0	ko00760,ko01100,ko01240,ko04977
UMP	UMP	Nucleotide and Its metabolomics	323	96.9	324.03587	Negative	[M-H]-	C9H13N2O9P	215.085	234.7176	255.2022	283.1424	296.2644	251.2452	267.687	314.9664	347.5752	304.4424	406.2762	279.9654	344.3814	355.2378	321.6198	299.418	325.4634	627.174	615.336	350.9904	C00105	HMDB0000288	58-97-9	ko00240,ko01100,ko01232,ko01240
L-Norvaline	L-Norvaline	Amino acids	118.0865	72.0835	117.078979	Positive	[M+H]+	C5H11NO2	39422.46	33437.1	45911.58	30437.16	33709.26	38063.46	33853.56	30626.58	32238	40367.16	48732.9	45741.3	52781.34	41211.54	26797.68	38726.7	40035.12	38470.32	34450.14	34419.78	-	-	6600-40-4	-
L-Cystine	L-Cystine	Amino acids	239	120	240.023848	Negative	[M-H]-	C6H12N2O4S2	13437.3	12163.5	13920.66	5191.368	4162.482	13383.3	9670.74	3777.948	11906.88	34691.58	14637	23240.64	6593.28	6844.98	5200.788	11670.72	12477.24	19940.58	20342.88	11280.9	C00491	HMDB0000192	56-89-3	ko00270,ko01100,ko02010,ko04216,ko04974
Homo-L-arginine	Homo-L-arginine	Amino acids	189	144	188.127326	Positive	[M+H]+	C7H16N4O2	187.3806	185.4336	195.1932	181.8132	188.4012	181.2354	191.568	215.2584	176.121	245.0022	510.8634	243.8568	471.351	289.5462	186.2136	250.7298	190.1214	209.547	216.7806	179.4936	C01924	HMDB0000670	156-86-5	-
L-Methionine	L-Methionine	Amino acids	150.05	104	149.051049	Positive	[M+H]+	C5H11NO2S	7460.76	7467.84	7212.48	7606.86	9043.44	8755.2	9862.98	8964.96	7475.94	8943.78	6503.28	10406.88	9983.52	5657.574	7460.28	6062.04	12558.18	9415.74	9382.68	8355.9	C00073	HMDB0000696	63-68-3	ko00270,ko00470,ko00970,ko01100,ko01210,ko01230,ko01240,ko01523,ko04148,ko04974,ko04978,ko04980,ko05230
Phenylalanine	Phenylalanine	Amino acids	166.1	103.05	165.078979	Positive	[M+H]+	C9H11NO2	27255.54	24321.24	35022.84	24782.94	30274.2	29953.08	29219.52	28613.16	27304.26	28932.06	33778.08	37071.54	38560.08	30197.22	21150.48	26372.58	32319.12	26025.42	25923.12	26766.06	C00079	HMDB0000159	63-91-2	ko00360,ko00400,ko00470,ko00970,ko01100,ko01210,ko01230,ko02010,ko04974,ko04978,ko05230
L-Isoleucine	L-Isoleucine	Amino acids	132.1	57.1	131.094629	Positive	[M+H]+	C6H13NO2	6188.1	6256.74	6775.44	6345.06	5838.582	6583.8	6459.6	5015.61	5530.2	4755.036	6003	7644.66	6871.62	4786.296	5015.472	6239.58	8315.4	5644.986	5671.848	5512.704	C00407	HMDB0000172	73-32-5	ko00280,ko00290,ko00970,ko01100,ko01210,ko01230,ko02010,ko04974,ko04978,ko05230
L-Leucine	L-Leucine	Amino acids	132.1	43.05	131.094629	Positive	[M+H]+	C6H13NO2	9751.2	10797	10012.74	9471.66	9419.46	10506.9	10915.5	8107.62	9312.84	7832.16	7688.28	11245.8	9778.74	7077.96	8058.9	9249.84	13374.18	9095.16	9743.34	9153	C00123	HMDB0000687	61-90-5	ko00280,ko00290,ko00970,ko01100,ko01210,ko01230,ko02010,ko04150,ko04974,ko04978,ko05230
L-Asparagine	L-Asparagine	Amino acids	131	114	132.053493	Negative	[M-H]-	C4H8N2O3	2835.414	2909.718	2145.264	2065.836	2749.65	2627.262	2906.898	2666.802	2616.45	2879.676	1931.574	2611.308	2738.004	1626.762	2395.47	1940.958	3553.158	2719.398	2608.152	2416.632	C00152	HMDB0000168	70-47-3	ko00250,ko00970,ko01100,ko01230,ko04974,ko04978,ko05230
Ornithine	Ornithine	Amino acids	133.09	70	132.089878	Positive	[M+H]+	C5H12N2O2	2925.3	3915.264	5386.53	3636.24	4192.872	4261.356	4181.43	4637.22	3952.362	5032.104	6305.04	5833.152	9609.24	5280.132	3728.238	4861.128	5790.066	3256.404	3257.838	3488.562	C00077	HMDB0000214	3184-13-2	ko00220,ko00330,ko00470,ko00480,ko01100,ko01210,ko01230,ko02010,ko04148
5-methylcytidine	5-methylcytidine	Nucleotide and Its metabolomics	258.1	126.1	257.101172	Positive	[M+H]+	C10H15N3O5	139.1478	96.0918	196.1406	92.178	89.5284	134.6268	94.7514	96.9354	108.3684	132.6672	196.3182	116.991	124.7868	134.9094	64.5396	134.8818	90.0618	140.1396	101.2104	100.5882	-	HMDB0000982	2140-61-6	-
Serine	Serine	Amino acids	104.034769	74	105.042594	Negative	[M-H]-	C3H7NO3	15163.44	15969.84	12733.08	13499.52	17526.48	16527.3	18434.58	15007.2	15844.14	18029.88	14023.26	18169.8	19947	10809.24	16601.28	12570.6	18298.68	17203.32	16641.18	16773.9	C00065	HMDB0000187	56-45-1	ko00260,ko00270,ko00470,ko00564,ko00600,ko00630,ko00920,ko00970,ko01100,ko01200,ko01230,ko01240,ko02010,ko04071,ko04974,ko04978,ko05230
Tryptophan	Tryptophan	Amino acids	205.1	146.05	204.089878	Positive	[M+H]+	C11H12N2O2	13144.8	10354.74	7508.22	10605.9	10728	12004.92	11722.44	11588.4	12745.2	7137.66	9129.96	11015.04	10913.4	9939.48	10523.1	9405.96	13085.52	12046.92	11817.12	11131.74	C00078	HMDB0000929	73-22-3	ko00260,ko00380,ko00400,ko00970,ko01100,ko01210,ko01230,ko01240,ko04726,ko04974,ko04978,ko05143,ko05230
Arginine	Arginine	Amino acids	175.1	70.06	174.111676	Positive	[M+H]+	C6H14N4O2	19166.16	20598.72	16344.12	18224.4	23263.32	20494.92	27015.72	27979.56	28075.5	28194.66	23158.14	22252.68	22199.04	17919.3	19391.46	14933.52	30092.1	23335.14	23480.28	22309.26	C00062	HMDB0000517	74-79-3	ko00220,ko00330,ko00470,ko00970,ko01100,ko01230,ko02010,ko04148,ko04150,ko04974,ko05014,ko05022,ko05142,ko05146,ko05230
Histidine	Histidine	Amino acids	156.07	110.07	155.069477	Positive	[M+H]+	C6H9N3O2	2675.448	3585.03	3031.098	2363.604	2493.216	3291.18	2379.126	2841.924	3070.974	3724.932	3352.392	6777.12	4182.426	2659.686	2881.854	2371.062	2544.534	3625.056	3846.36	3447.726	C00135	HMDB0000177	71-00-1	ko00340,ko00410,ko00470,ko00970,ko01100,ko01230,ko02010,ko04974,ko05230
Tyrosine	Tyrosine	Amino acids	182.08	136.07	181.073894	Positive	[M+H]+	C9H11NO3	19662.96	21336.12	16423.56	24157.56	24023.52	24711.54	20384.28	20468.94	20966.28	20427.06	15569.4	22451.94	18263.82	14102.28	13910.46	14277.18	34988.7	19467.78	20008.38	20174.94	C00082	HMDB0000158	60-18-4	ko00130,ko00350,ko00360,ko00400,ko00730,ko00970,ko01100,ko01210,ko01230,ko01240,ko04728,ko04916,ko04917,ko04974,ko05012,ko05030,ko05031,ko05034,ko05230
N6-threonylcarbamoyladenosine	N6-threonylcarbamoyladenosine	Nucleotide and Its metabolomics	413.1	281.1	412.134264	Positive	[M+H]+	C15H20N6O8	35.56968	39.15954	59.4426	34.00356	40.9272	39.54216	34.25586	45.37086	39.50574	41.0136	70.1862	48.6612	62.211	52.52976	44.32152	48.65958	36.77934	38.57856	40.40226	43.32096	-	-	24719-82-2	-
ADP	ADP	Nucleotide and Its metabolomics	426	134	427.029419	Negative	[M-H]-	C10H15N5O10P2	1708.836	986.616	1392.756	1751.508	1385.772	1776.042	1592.784	1357.842	1644.162	835.356	3189.072	2413.53	3394.62	4191.72	2558.55	2565.69	1882.944	2864.766	2363.922	1582.374	C00008	HMDB0001341	58-64-0	ko00190,ko00230,ko01100,ko01232,ko01240,ko04068,ko04080,ko04142,ko04152,ko04611,ko04714,ko04742,ko04924,ko05012,ko05014,ko05022
Allantoin	Allantoin	Azoles	157.04	97.01	158.043991	Negative	[M-H]-	C4H6N4O3	47724.18	48252.12	76342.2	46605.12	43812.84	48337.86	33774.48	43353.3	31410.3	41410.74	86530.8	50043.48	65211.6	67896.6	41896.62	54079.92	46696.68	46211.7	44234.4	41231.4	C01551	HMDB0000462	97-59-6	-
Urocanic-acid	Urocanic acid	Azoles	139	121	138.042928	Positive	[M+H]+	C6H6N2O2	129.3648	106.9584	236.2116	105.123	116.3406	112.482	91.4526	129.744	118.068	150.4794	252.7182	185.8524	195.6954	113.2644	129.4272	143.421	174.1392	100.6956	94.5654	82.344	-	HMDB0000301	3465-72-3(104-98-3)	-
L-Homocitrulline	L-Homocitrulline	Amino acids	190.1	84.08	189.111342	Positive	[M+H]+	C7H15N3O3	96.234	51.717	44.97276	49.78584	47.77788	48.17118	47.53932	40.76814	40.4688	40.23954	55.30236	42.3153	50.96604	43.97892	39.21906	42.43968	36.84366	64.8522	47.889	68.0382	C02427	HMDB0000679	1190-49-4	-
L-norleucine	L-norleucine	Amino acids	132.1	86.2	131.094629	Positive	[M+H]+	C6H13NO2	6816.3	7014.24	5884.734	6293.22	6748.56	6938.1	7071.12	5872.764	6456.36	5193.816	4987.602	7116.96	6094.8	4251.738	5125.008	6288.6	7698.12	5525.886	5509.332	6899.4	C01933	HMDB0001645	327-57-1	-
5-formylcytidine	5-formylcytidine	Nucleotide and Its metabolomics	272.1	140	271.080437	Positive	[M+H]+	C10H13N3O6	33.67272	11.55924	14.27472	11.22324	11.6748	21.24372	8.97174	9.8991	12.09672	19.42038	14.42262	10.09866	14.83776	19.6767	7.25214	9.2565	9.83424	18.69348	12.9225	11.44056	-	-	148608-53-1	-
L-Proline	L-Proline	Amino acids	116.1	70.1	115.063329	Positive	[M+H]+	C5H9NO2	21184.08	22774.56	22781.04	16469.4	18712.74	24247.98	22134.6	23924.04	21562.98	32074.2	36504.18	24549.18	36599.22	21438	19184.58	22777.68	29313.48	26671.44	22258.44	22030.38	C00148	HMDB0000162	147-85-3	ko00330,ko00470,ko00970,ko01100,ko01230,ko02010,ko04974,ko04978,ko05230
Glutamine	Glutamine	Amino acids	147.069	84	146.069143	Positive	[M+H]+	C5H10N2O3	54161.1	59115.06	48541.92	54503.34	53796.9	52877.94	53364.48	55175.94	52331.4	51281.76	44007.24	50701.44	54392.34	44967.96	52384.92	50123.16	56504.4	63696.6	57702.42	57281.4	C00064	HMDB0000641	56-85-9	ko00220,ko00230,ko00240,ko00250,ko00470,ko00630,ko00750,ko00910,ko00970,ko01100,ko01230,ko01232,ko01240,ko02010,ko04724,ko04727,ko04964,ko04974,ko04978,ko05230
L-Glutamic-acid	L-Glutamic acid	Amino acids	146	102	147.053159	Negative	[M-H]-	C5H9NO4	4120.74	4694.058	4437.486	4290.738	4881.114	5246.382	5458.722	5963.532	6826.8	6378.18	5621.556	5569.494	4812.462	4901.88	4942.116	4191.708	6052.02	5194.236	5230.932	5273.046	C00025	HMDB0000148	56-86-0(6893-26-1)	ko00220,ko00250,ko00330,ko00340,ko00430,ko00470,ko00480,ko00524,ko00630,ko00650,ko00860,ko00910,ko00970,ko01100,ko01200,ko01210,ko01230,ko01240,ko02010,ko04068,ko04072,ko04080,ko04216,ko04540,ko04713,ko04720,ko04721,ko04723,ko04724,ko04727,ko04730,ko04742,ko04964,ko04974,ko05014,ko05016,ko05017,ko05022,ko05030,ko05031,ko05033,ko05034,ko05230
Threonine	Threonine	Amino acids	118.050419	74	119.058244	Negative	[M-H]-	C4H9NO3	13200.18	13173.6	13627.56	12010.98	16471.2	18389.4	21855.54	19666.98	20400.66	21468.66	16740.12	20527.74	23064.96	11113.14	13620.84	11107.44	24137.7	26066.7	20280.78	19989.66	C00188	HMDB0000167	72-19-5	ko00260,ko00290,ko00470,ko00860,ko00970,ko01100,ko01230,ko02010,ko04974,ko04978
L-Aspartate	L-Aspartate	Amino acids	134.04	74	133.037509	Positive	[M+H]+	C4H7NO4	5083.638	6617.4	5107.14	5276.076	6927.96	6167.22	7646.94	7578.66	8187.18	7573.32	7801.92	5824.686	5820.09	4944.516	7122.66	4936.5	6560.46	6215.28	6065.04	6113.64	C00049	HMDB0000191	56-84-8	ko00220,ko00250,ko00260,ko00270,ko00340,ko00410,ko00470,ko00760,ko00770,ko00970,ko01100,ko01200,ko01210,ko01230,ko01240,ko02010,ko04080,ko04974,ko05230
Glycine	Glycine	Amino acids	76.03	30	75.032029	Positive	[M+H]+	C2H5NO2	31899.3	28443	29883.18	23844.66	24579.54	30989.94	24991.44	23111.46	26062.56	34083.36	35829.24	31692.06	44953.62	25254.24	31682.88	28758	28341.9	42435.24	39290.7	23171.58	C00037	HMDB0000123	56-40-6	ko00120,ko00230,ko00260,ko00310,ko00440,ko00470,ko00480,ko00630,ko00730,ko00785,ko00860,ko00970,ko01100,ko01200,ko01230,ko01240,ko02010,ko04080,ko04721,ko04974,ko04978,ko05230
Lysine	Lysine	Amino acids	147.069	84	146.105528	Positive	[M+H]+	C6H14N2O2	44628.24	40262.04	36946.62	36373.8	48437.22	35184.96	46052.46	48885	44344.44	45379.86	34929.9	42393.54	40552.56	30906.06	37862.82	35003.82	45649.38	43288.44	42140.82	43694.4	C00047	HMDB0000182	56-87-1	ko00310,ko00470,ko00780,ko00970,ko01100,ko01210,ko01230,ko02010,ko04974
L-Alloisoleucine	L-Alloisoleucine	Amino acids	132.1	69.07	131.094629	Positive	[M+H]+	C6H13NO2	6928.14	6817.86	7212	6952.68	6602.04	7357.68	7369.32	6124.8	6432.78	5385.918	6392.4	8428.08	7370.28	5239.728	5591.058	6626.16	9244.38	6284.58	6467.04	6215.76	-	HMDB0000557	1509-34-8	-
1-heptadecanoyl-sn-glycero-3-phosphocholine	1-heptadecanoyl-sn-glycero-3-phosphocholine	LPC	510.36	184.07	509.348141	Positive	[M+H]+	C25H52NO7P	7836.96	9610.44	9537.12	11929.62	11738.82	13492.74	10301.28	10257.3	11022.24	9867.3	6662.64	12972.96	7746.48	9976.32	7868.16	9033.96	11561.4	11034.42	10036.62	10359.84	-	HMDB0012108	50930-23-9	-
1-(9Z,12Z-octadecadienoyl)-sn-glycero-3-phosphocholine	1-(9Z,12Z-octadecadienoyl)-sn-glycero-3-phosphocholine	LPC	520.34	184.07	519.332491	Positive	[M+H]+	C26H50NO7P	60561.6	58161.9	57736.08	57836.7	59705.4	57664.26	57448.26	59094.6	58798.8	58868.64	60053.4	55565.58	53464.74	53473.62	53595.24	53378.58	53572.8	60011.4	58546.02	59470.92	-	HMDB0010386	22252-07-9	-
1-Palmitoyl-sn-glycero-3-phosphocholine	1-Palmitoyl-sn-glycero-3-phosphocholine	LPC	496.35	104.12	495.332491	Positive	[M+H]+	C24H50NO7P	9084	10288.74	9132	9563.16	9457.08	8356.2	9405.54	10044.06	9634.38	8261.58	8716.32	8567.82	7295.46	8173.86	8214.96	7507.5	8975.64	9606.18	9675.72	8915.82	C04230	HMDB0010382	17364-16-8	ko00564,ko04148,ko05231
Apigenic-acid	Apigenic acid	FFA	283.2618	247.2436	282.2558803	Positive	[M+H]+	C18H34O2	982.95	1537.074	1817.268	1002.504	1615.908	1215.84	814.296	1049.526	1217.166	1146.906	1726.776	1779.9	2180.112	1863.648	988.734	1646.316	1138.14	1039.914	1062.198	1070.832	-	HMDB0002080	593-39-5	-
Heptadecanoic-acid	Heptadecanoic acid	FFA	269.25	269.25	270.25588	Negative	[M-H]-	C17H34O2	948.36	1483.476	597.4698	1501.638	1343.508	1009.428	796.986	576.9522	1088.142	752.088	365.1444	736.098	319.3926	271.6842	1095.234	953.694	1012.818	1396.434	896.436	1260.768	-	HMDB0002259	506-12-7	-
adrenic-acid	adrenic acid	FFA	331.26	331.26	332.27153	Negative	[M-H]-	C22H36O2	6406.8	5580.336	16395.42	11905.86	9867.54	7738.92	4581.276	6806.04	5395.32	2677.44	3396.93	4162.29	3965.238	3364.38	2976.618	6957	7116.54	7475.34	5525.418	4711.956	-	HMDB0002226	28874-58-0	-
Docosahexaenoic-Acid	Docosahexaenoic Acid	FFA	329.25	329.25	328.24023	Positive	[M+H]+	C22H32O2	19981.02	20384.1	35783.94	28333.2	22725.3	16618.5	15395.52	17499.6	17089.86	18658.5	18548.1	21070.92	16893.96	21657.3	9889.14	18538.56	21323.64	26880.84	24730.62	25299.36	-	HMDB0002183	6217-54-5	-
ACA	Allocholic acid	Bile acids	407.2803	407.28	408.287575	Negative	[M-H]-	C24H40O5	31.0284	10.96902	879.552	406.4112	251.8584	510.0162	13.8909	29.58684	8.24868	221.535	43.46892	136.7196	222.318	134.6934	16.43004	266.2122	407.2482	176.853	199.5102	197.091	-	HMDB0000505	2464-18-8	-
Linoleic-acid	Linoleic acid	FFA	279.23	279.23	280.24023	Negative	[M-H]-	C18H32O2	12408.78	10947.54	22078.68	14674.02	15504.12	11893.62	6078.96	11252.52	9489.3	8959.26	7918.8	12368.64	4747.242	7312.8	10822.26	6495.6	7137.66	13738.5	15495.72	12776.88	-	HMDB0000673	60-33-3	-
Tauroursodeoxycholic-acid	Tauroursodeoxycholic acid	Bile acids	498.3	79.8	499.296759	Negative	[M-H]-	C26H45NO6S	18.87684	15.83118	33.61644	22.18188	49.7787	44.8872	11.69784	8.50344	8.41134	22.06926	21.36522	40.92738	49.25994	25.23342	22.31538	27.018	17.1174	18.99666	21.27246	20.7876	C16868	HMDB0000874	14605-22-2	-
Isovaleryl-carnitine	Isovaleryl-carnitine	CAR	246.2	85.1	245.162709	Positive	[M+H]+	C12H23NO4	11.16288	8.2104	7.50048	8.51628	8.47518	8.3316	7.88514	7.87206	8.1729	9.26922	8.10066	10.23336	9.16698	13.87824	4.075038	7.07856	13.38342	6.54402	7.76874	7.29456	-	HMDB0000688	31023-24-2	-
Isobutyryl-L-carnitine	Isobutyryl-L-carnitine	CAR	232.2	85	231.147059	Positive	[M+H]+	C11H21NO4	132.837	133.0536	87.4818	154.6326	162.9336	147.3054	170.9016	186.4944	180.0774	192.1788	199.0356	161.1234	170.3778	218.3232	123.8766	158.442	164.718	135.4956	131.187	134.0838	-	HMDB0000736	25518-49-4	-
Dodecanoylcarnitine	Dodecanoylcarnitine	CAR	344.28	85.03	344.280084	Positive	[M]+	C19H38NO4	19.57542	7.74528	24.7641	15.2721	20.99628	13.12578	10.13112	10.54842	8.65242	12.9735	15.4773	11.08134	16.74006	22.61346	6.80466	18.1266	7.54254	10.70868	12.44724	12.11574	-	HMDB0002250	25518-54-1	-
Myristoyl-L-carnitine	Myristoyl-L-carnitine	CAR	372.3223	85.0339	408	Positive	[M-Cl]+	C21H41NO4	70.3746	31.77006	74.394	56.8026	50.55336	56.87502	34.86414	38.85072	37.1223	50.93244	46.99482	44.0841	53.84514	84.789	25.09434	53.01684	37.6287	39.67374	41.53746	42.78726	-	-	173686-73-2	-
2-Methylbutyroylcarnitine	2-Methylbutyroylcarnitine	CAR	246.2	85.1	245.162709	Positive	[M+H]+	C12H23NO4	12.14658	8.83824	8.38032	10.6941	9.03966	9.0603	7.43352	7.75194	9.73872	9.68034	9.4596	11.86152	9.51042	14.99922	4.7271	8.20446	14.52084	7.61082	8.00328	7.50804	-	HMDB0000378	31023-25-3	-
Propionyl-L-Carnitine	Propionyl-L-Carnitine	CAR	218.13868	218.1394	217.131409	Positive	[M+H]+	C10H19NO4	316.3836	326.5422	209.0304	311.1534	341.0682	354.3918	359.4024	355.2018	418.9098	474.3894	437.367	578.9634	491.6496	400.0122	232.9422	280.6926	432.0732	292.3032	272.5086	293.6922	-	HMDB0000824	119793-66-7	-
EPA	EPA	FFA	301.22	301.22	302.22458	Negative	[M-H]-	C20H30O2	320.3304	306.5082	804.792	517.7016	314.0496	295.2972	244.0908	303.9264	342.441	331.8414	310.668	286.9764	271.224	353.1852	148.1694	238.1382	285.9582	293.0022	438.9012	311.9052	-	HMDB0001999	10417-94-4	-
3-Methylglutarylcarnitine	3-Methylglutarylcarnitine	CAR	290.15981	213.0749	289.152539	Positive	[M+H]+	C13H23NO6	4.423194	3.533346	5.772372	3.456066	4.24278	3.598098	2.517438	2.292366	2.154894	3.14898	8.3733	3.261186	5.904378	8.06394	4.352658	7.78518	5.311482	3.303726	3.125928	3.872364	-	HMDB0000552	102673-95-0	-
Biotin	Biotin	CoEnzyme and vitamins	243.3	200.4	244.088163	Negative	[M-H]-	C10H16N2O3S	736.872	716.22	480.7692	682.512	833.754	1028.958	775.548	1032.09	641.502	793.812	750.222	1581.402	1920.78	1580.346	532.44	864.138	1165.398	754.062	883.686	763.302	C00120	HMDB0000030	58-85-5	ko00780,ko01100,ko01240,ko02010,ko04977
Oleylcarnitine	Oleylcarnitine	CAR	427.37	85.03	426.358334	Positive	[M+H]+	C25H48NO4	298.3356	179.586	330.9456	307.1424	228.321	280.5708	173.6592	157.9788	175.083	215.076	188.8008	200.94	213.2166	328.878	117.0144	253.395	187.7274	207.4476	190.7406	214.998	-	HMDB0005065	38677-66-6	-
Vitamin-B2	Vitamin B2	CoEnzyme and vitamins	377.15	243.09	376.138286	Positive	[M+H]+	C17H20N4O6	35.59302	35.84886	39.5664	31.52106	27.3363	44.3346	31.50276	34.72224	27.06324	35.60688	43.59492	49.16874	58.00518	57.24582	32.6073	30.54618	45.72738	33.74304	31.1064	35.27622	-	HMDB0000244	83-88-5	-
Thiamine-pyrophosphate	Thiamine pyrophosphate	CoEnzyme and vitamins	423.1	301.9	425.04497	Negative	[M-H]-	C12H19N4O7P2S	482.5884	528.7278	655.44	407.6454	521.496	354.9672	695.346	663.042	604.566	749.166	867.63	663.606	553.0572	634.242	289.092	509.8104	546.5196	688.278	556.8828	552.1122	-	HMDB0001372	154-87-0	-
vitamin-B1	vitamin B1	CoEnzyme and vitamins	265.1111	122.0708	300.81	Positive	[M-Cl]+	C12H17ClN4OS	37.61514	37.23828	34.21218	29.76966	39.36666	44.20626	28.43616	30.89328	30.1128	35.69076	35.41992	38.955	38.81892	32.05164	37.04388	34.85262	31.44666	37.24944	32.03802	34.06944	-	-	59-43-8	-
Flavin-mononucleotide	Flavin mononucleotide	CoEnzyme and vitamins	455.2	97	456.104618	Negative	[M-H]-	C17H21N4O9P	123.9558	146.8758	274.6002	154.5984	171.9924	203.4822	154.0968	121.8042	139.6044	200.2344	293.8548	200.6232	520.0344	294.0042	192.1326	245.0304	209.5632	215.241	241.7094	130.7118	C00061	HMDB0001520	146-17-8	ko00740,ko01100,ko01240,ko04977
3-Hydroxy-9-hexadecenoyl-L-carnitine	3-Hydroxy-9-hexadecenoyl-L-carnitine	CAR	414.3214	145.0497	413.314124	Positive	[M+H]+	C23H43NO5	5.395344	1.567938	5.433498	4.40592	3.945288	4.614198	1.621164	2.009136	1.862442	3.144288	3.657078	2.56578	3.538362	6.25614	1.425222	4.09509	1.945086	2.771706	2.607558	2.637012	-	-	-	-
Acetyl-carnitine	Acetyl-carnitine	CAR	204.2	85.1	203.115759	Positive	[M+H]+	C9H17NO4	5100.738	2620.788	3232.086	4551.12	4521.654	3344.334	3225.558	2807.424	3550.908	2687.688	2171.334	2949.426	2029.152	3745.338	1968.528	3561.726	2180.712	3271.356	3396.648	3377.31	C02571	HMDB0000201	3040-38-8	ko04931
Myristic-acid	Myristic acid	FFA	227.2	227.2	228.20893	Negative	[M-H]-	C14H28O2	1521.432	536.469	7765.74	4478.694	7761.9	3116.874	2145.198	2872.122	1583.052	3941.052	2761.416	1218.738	2092.998	4041.546	1158.186	5266.626	2023.032	3532.776	2395.812	2935.878	-	HMDB0000806	544-63-8	-
Octanoyl-carnitine	Octanoyl-carnitine	CAR	288.2	85.1	287.209659	Positive	[M+H]+	C15H29NO4	10.52322	4.88316	10.53768	10.18428	13.70094	7.84572	6.71742	6.91218	7.4805	10.6701	9.2868	6.53142	7.31202	14.17578	4.33098	8.00352	4.48308	7.57386	6.75648	7.22514	C02838	HMDB0000791	25243-95-2	-
Trigonelline	Trigonelline	CoEnzyme and vitamins	138	94	137.047679	Positive	[M+H]+	C7H7NO2	205.2102	289.023	465.8916	191.9088	253.6524	433.7298	416.6388	373.5966	396.3054	662.298	796.038	553.8984	499.8216	278.8308	288.1044	267.486	376.0158	468.4116	403.7058	374.0598	C01004	HMDB0000875	535-83-1	-
Stearoyl-carnitine	Stearoyl-carnitine	CAR	428.4	85.1	427.366159	Positive	[M+H]+	C25H49NO4	25.3545	17.59956	15.35262	21.3885	20.40678	17.2371	15.20778	14.29218	13.74282	15.77574	5.463906	13.11438	5.008704	7.52382	10.7001	11.4393	18.3846	18.4026	16.84344	18.04434	-	HMDB0000848	25597-09-5	-
L-palmitoylcarnitine	L-palmitoylcarnitine	CAR	400.35	341.27	400.342684	Positive	[M]+	C23H46NO4	64.0362	49.71204	55.56852	56.25786	46.50072	47.979	50.7999	46.1484	44.6208	61.1226	40.90716	45.64974	36.02904	60.5562	32.70282	48.01896	49.3248	49.60584	49.16952	50.2776	C02990	HMDB0000222	2364-67-2	ko00071,ko01212
Hexanylcarnitine	Hexanylcarnitine	CAR	260.19	85.03	259.178359	Positive	[M+H]+	C13H25NO4	37.99494	12.59646	52.33362	46.16166	47.7006	28.86942	21.37944	19.03782	19.72188	27.49602	24.50202	22.8324	22.4277	41.59422	9.9183	30.38478	11.97174	24.69804	22.62408	23.62176	-	HMDB0000756	22671-29-0	-
Arachidonylcarnitine	Arachidonylcarnitine	CAR	449.35	85.03	448.342684	Positive	[M+H]+	C27H46NO4	30.20058	30.87078	32.34054	37.0479	40.10988	30.68154	30.33078	26.83602	32.58894	44.12928	42.95436	35.55972	42.60318	36.68244	24.51972	42.87714	28.56798	31.89084	30.59946	29.244	-	HMDB0006455	36816-11-2	-
DL-carnitine	DL-carnitine	CAR	162.2	103	161.105194	Positive	[M+H]+	C7H15NO3	3484.224	6261.06	2197.194	4270.68	5267.268	4205.058	5818.992	5418.21	6057.96	6016.74	5738.274	5971.29	4472.028	3383.934	6125.4	4279.512	5572.968	4699.758	4752.354	4500.846	-	-	461-06-3	-
Decanoyl-carnitine	Decanoyl-carnitine	CAR	316.2	85.1	315.240959	Positive	[M+H]+	C17H33NO4	11.91228	5.216328	14.2503	11.36082	15.94524	9.80466	7.0299	9.29034	8.30646	14.51154	13.01808	8.32218	11.5107	18.3831	6.45672	14.9529	5.73306	9.32592	8.56938	9.08316	-	-	3992-45-8	-
8,11,14-Eicosatrienoic-Acid	8,11,14-Eicosatrienoic Acid	FFA	305.25	305.25	306.25588	Negative	[M-H]-	C20H34O2	568.2564	550.0782	1174.014	1096.428	775.194	343.8936	413.0916	426.777	630.816	485.3526	795.396	677.484	344.1204	580.9878	443.4564	510.333	371.6898	724.422	748.674	667.176	-	HMDB0002925	7324-41-6	-
Palmitoleic-acid	Palmitoleic acid	FFA	253.22	253.22	254.22458	Negative	[M-H]-	C16H30O2	2121.09	3279.348	11346.06	8185.92	4919.556	3360.246	1910.028	2154.534	3644.226	3865.686	1941.75	2430.75	2499.426	9510.66	1631.886	10150.68	2106.462	4785.312	8861.64	7303.68	-	HMDB0003229	373-49-9	-
alpha-Linolenic-acid	alpha-Linolenic acid	FFA	277.22	277.22	278.22458	Negative	[M-H]-	C18H30O2	519.0288	514.4028	1747.386	1461.348	1523.73	703.812	522.6492	566.7378	1003.86	639.186	589.1034	857.88	475.7292	724.038	238.0386	1130.466	460.2798	1014.18	987.534	679.482	-	HMDB0001388	463-40-1	-
Corticosterone	Corticosterone	Hormones and hormone related compunds	347.2	121.1	346.21441	Positive	[M+H]+	C21H30O4	243.477	167.079	178.0548	193.2258	145.9638	103.7676	101.61	74.4894	146.3976	4.34442	24.44148	82.5258	264.9336	303.5562	47.7153	79.716	103.5168	120.3408	128.3748	135.6432	C02140	HMDB0001547	50-22-6	ko00140,ko01100,ko04923,ko04925,ko05020
Cortexolone	Cortexolone	Hormones and hormone related compunds	347.3	109.2	346.21441	Positive	[M+H]+	C21H30O4	27.31554	17.99394	19.9431	21.77826	17.15022	11.90052	11.83572	8.32404	15.16872	0.918408	2.993682	8.5611	27.55674	35.04918	5.677872	9.16584	11.72682	14.29938	14.15856	13.51794	C05488	HMDB0000015	152-58-9	ko00140,ko01100,ko04927,ko04934
Thyroxine	Thyroxine	Hormones and hormone related compunds	777.694554	731.4	776.686729	Positive	[M+H]+	C15H11I4NO4	30.15126	27.01104	35.85498	27.26508	28.1643	24.5211	25.06428	34.54074	26.64486	28.50048	28.5219	25.78194	22.24602	27.7698	26.29578	28.91592	22.9296	28.09122	26.58444	26.65056	C01829	HMDB0000248	51-48-9	ko00350,ko01100,ko04080,ko04918,ko04919,ko04976,ko05320
2-Hydroxyhexadecanoic-acid	2-Hydroxyhexadecanoic acid	Hydroxy fatty acids	271.2	271.2	272.235145	Negative	[M-H]-	C16H32O3	24.8655	64.0008	43.32648	24.80862	38.76048	27.7152	22.08696	25.25208	28.15464	23.95386	24.11868	36.24324	29.42766	27.78762	18.19902	30.35226	21.51804	25.87578	24.98508	23.9403	-	HMDB0031057	764-67-0	-
2-Hydroxydecanoic-acid	2-Hydroxydecanoic acid	Hydroxy fatty acids	187.1	141.1	188.141245	Negative	[M-H]-	C10H20O3	8.9373	8.30046	19.22538	13.48722	15.96234	17.43336	7.19208	10.65666	9.90618	11.14806	8.8992	17.66394	25.79178	14.703	5.69478	12.84048	11.5986	9.58218	9.0984	8.57928	-	-	5393-81-7	-
12-hydroxystearic-acid-	12-hydroxystearic acid	Hydroxy fatty acids	299.26	299.26	300.266445	Negative	[M-H]-	C18H36O3	139.4196	257.1684	294.051	165.2262	249.4344	217.3044	99.0966	140.1996	196.5006	176.1528	282.936	304.371	306.945	250.4382	149.2416	285.651	177.183	123.927	132.168	122.304	-	HMDB0061706	106-14-9	-
Guanidinoethyl-Sulfonate	Guanidinoethyl Sulfonate	Sulfonic acids	168.04	151.01	167.036462	Positive	[M+H]+	C3H9N3O3S	105.6588	91.4496	168.7986	100.2996	110.6628	100.6182	81.537	78.7518	86.2716	163.578	166.401	127.5468	158.5512	126.4524	98.2302	121.233	111.375	129.3018	95.571	98.0676	C01959	HMDB0003584	543-18-0	ko00430
Uric-acid	Uric acid	Imidazopyrimidines	167.02	42	168.028341	Negative	[M-H]-	C5H4N4O3	1306.896	1418.328	2558.454	1901.67	1607.292	1416.432	2171.436	2564.094	2864.526	2730.372	2464.662	3014.28	1499.886	2599.038	1265.382	1983.426	2115.6	1525.584	1434.654	1448.316	-	HMDB0000289	69-93-2	-
Indolelactic-acid	Indolelactic acid	Indole and Its derivatives	206.1	118.1	205.073894	Positive	[M+H]+	C11H11NO3	158.3316	134.3268	210.1914	159.612	127.53	230.8992	158.8914	190.7982	183.7728	173.3178	374.1666	184.92	782.586	303.3132	259.638	192.6204	132.891	188.2572	197.6058	183.4158	C02043	HMDB0000671	1821-52-9	-
Indolylpropionic-acid	Indolylpropionic acid	Indole and Its derivatives	190.09	130.07	189.078979	Positive	[M+H]+	C11H11NO2	610.158	417.8226	403.1304	675.996	793.512	662.994	544.2126	1074.066	496.3818	1533.798	1472.754	1455.924	1536.282	1325.448	1328.28	1289.388	1217.22	889.842	866.718	898.728	-	HMDB0002302	830-96-6	-
beta-indole-3-acetic-acid	beta-indole-3-acetic acid	Indole and Its derivatives	176	130.1	175.063329	Positive	[M+H]+	C10H9NO2	72.5034	22.4364	210.2064	84.1998	135.7266	82.6548	88.3524	57.62202	58.79856	109.8996	88.4754	222.0624	567.0354	70.8816	104.481	44.92482	156.8322	112.5888	114.2106	106.6626	C00954	HMDB0000197	87-51-4	ko00380,ko01100
Indole-3-Carboxaldehyde	Indole-3-Carboxaldehyde	Indole and Its derivatives	146.060589	118.1	145.052764	Positive	[M+H]+	C9H7NO	66.2202	35.1813	50.4963	37.85436	39.75486	58.57476	43.80888	54.53598	54.47514	51.04344	69.792	82.3326	127.6422	106.878	61.1412	48.55572	57.5493	52.45644	52.60758	49.92762	C08493	HMDB0029737	487-89-8	-
1-Myristoyl-sn-glycero-3-phosphocholine	1-Myristoyl-sn-glycero-3-phosphocholine	LPC	468.3	184	467.301191	Positive	[M+H]+	C22H46NO7P	469.2174	565.395	725.268	534.561	538.914	663.132	553.9086	609.972	686.988	664.182	859.284	827.952	837.498	880.188	615.6	727.29	717.738	555.5706	533.0286	537.7092	-	HMDB0010379	20559-16-4	-
Choline-alfoscerate	Choline alfoscerate	LPC	258.11	104	257.102826	Positive	[M+H]+	C8H20NO6P	3285.264	7314.72	6017.4	6658.14	5134.536	4126.086	5634.66	6724.5	6952.14	5546.928	7955.16	5167.122	5903.286	6854.82	4677.432	5967.768	5150.736	4140.48	4983.462	4325.226	C00670	HMDB0000086	28319-77-9	ko00564,ko00565,ko05231
Indole-3-acetamide	Indole-3-acetamide	Indole and Its derivatives	173.2	130	174.079313	Negative	[M-H]-	C10H10N2O	13.51302	8.04774	8.68476	13.27116	11.25972	14.47152	13.13718	10.07346	9.48738	9.8289	7.73352	15.84486	6.22254	9.7479	7.3992	8.27688	17.0181	10.59432	13.00596	10.10328	C02693	HMDB0029739	879-37-8	ko00380,ko01100
L-citrulline	L-citrulline	Amino acids	176.1	113	175.095692	Positive	[M+H]+	C6H13N3O3	13067.28	14975.22	14754.42	13180.74	12874.62	13637.34	15777.24	15817.26	13320.24	12625.14	14272.44	13168.56	15803.64	10049.28	11020.14	10701.78	13953.48	13255.8	9766.44	13944.06	C00327	HMDB0000904	372-75-8	ko00220,ko01100,ko01230
Taurocholic-acid	Taurocholic acid	Bile acids	514.3	79.8	515.291674	Negative	[M-H]-	C26H45NO7S	182.6838	180.8538	485.415	552.807	775.344	646.536	69.8502	101.007	67.7382	227.3532	149.5074	353.496	243.0258	195.5814	204.1974	205.0644	207.8034	269.5074	294.3	282.4794	C05122	HMDB0000036	81-24-3	ko00120,ko00430,ko01100,ko04976,ko04979
Testosterone	Testosterone	Hormones and hormone related compunds	289.20893	97.2	288.20893	Positive	[M+H]+	C19H28O2	0.881892	0.965358	1.057308	0.719442	15.81594	4.99344	21.71154	4.547898	20.20554	17.13432	1.171098	1.038438	0.71412	0.936066	8.04546	1.068774	0.771996	6.52176	5.851476	5.717898	C00535	HMDB0000234	58-22-0	ko00140,ko01100,ko01522,ko04913,ko04929,ko05200,ko05215
stearic-acid	stearic acid	FFA	283.26425	283.2649	284.27153	Negative	[M-H]-	C18H36O2	11997.12	15586.2	13395.78	15588.3	23623.2	9047.28	18370.2	18961.62	20309.64	10051.8	8038.02	8190.18	5509.866	4874.04	22307.94	13935.42	21930.84	13064.58	17902.56	13813.02	-	HMDB0000827	57-11-4	-
cis-11-Octadecenoic-acid	cis-11-Octadecenoic acid	FFA	281.25	281.25	282.25588	Negative	[M-H]-	C18H34O2	7751.4	5811.108	16767.9	12396.12	14760.72	7534.8	5947.698	5034.6	6576.18	7617.24	5616.732	5785.434	4716.378	8126.52	4148.316	10678.68	4213.446	9985.92	11748.54	9878.4	-	HMDB0240219	506-17-2	-
Octadecanedioate-(C18)	Octadecanedioate (C18)	Fatty Acyls	313.2	251.2	314.24571	Negative	[M-H]-	C18H34O4	21.68532	112.2318	73.7022	29.23644	35.69772	25.05504	11.75106	17.10504	26.42922	16.6038	36.92502	29.4141	45.60516	24.56334	17.03508	29.29752	14.65836	24.99186	27.52758	22.78344	-	HMDB0000782	871-70-5	-
Tridecanedioic-acid	Tridecanedioic acid	Fatty Acyls	243.16	225.15	244.16746	Negative	[M-H]-	C13H24O4	3.705018	63.8028	12.17976	5.632854	13.2288	7.63074	2.83899	5.380332	12.58326	4.553004	16.1793	25.97364	20.94366	14.6595	2.794944	11.99538	3.823614	6.94296	4.62297	5.72562	-	HMDB0002327	505-52-2	-
Hexadecanedioic-acid	Hexadecanedioic acid	Fatty Acyls	285.2	285.2	286.21441	Negative	[M-H]-	C16H30O4	13.88694	50.3115	46.02732	19.25022	20.82678	18.2208	9.83088	9.83616	14.40432	9.24936	19.26102	16.7892	25.82094	18.04134	10.1967	21.3219	9.32826	15.41298	16.02924	14.6724	C19615	HMDB0000672	505-54-4	ko01100
Pimelic-acid	Pimelic acid	Fatty Acyls	159.07	97.07	160.07356	Negative	[M-H]-	C7H12O4	16.86378	87.7626	34.20198	16.94772	17.64186	15.35748	12.03036	21.8613	17.8218	13.17102	17.93334	31.62078	28.22478	17.05992	13.11636	25.06212	15.61938	14.33964	15.06912	15.20592	-	HMDB0000857	111-16-0	-
Tauro-beta-muricholic-acid	Tauro-beta-muricholic acid	Bile acids	514.3	79.8	515.291674	Negative	[M-H]-	C26H45NO7S	58.01856	42.63876	267.8478	249.9864	135.3672	332.2056	15.36504	34.05504	29.88246	106.9038	121.686	160.1922	175.038	62.628	152.4798	134.7306	90.8694	108.186	110.1402	103.6332	-	HMDB0000932	25696-60-0	-
Dodecanedioic-Acid	Dodecanedioic Acid	Fatty Acyls	229.14	211.14	230.15181	Negative	[M-H]-	C12H22O4	13.48914	105.4956	27.98166	16.4025	31.11912	20.8638	13.03434	16.86558	31.72986	13.7112	28.6626	43.54716	40.11378	24.02136	13.05846	26.70438	13.55982	19.19946	19.36584	18.62388	-	HMDB0000623	693-23-2	-
Palmitoyl-ethanolamide	Palmitoyl ethanolamide	Fatty amides	300.29	62.06	299.282429	Positive	[M+H]+	C18H37NO2	11.32908	14.69916	16.80942	17.15436	14.18868	13.93218	15.12252	15.07392	16.14744	18.58158	7.94376	18.2532	9.2379	10.52706	11.43786	16.48512	15.51126	20.83566	21.37494	19.46136	C16512	HMDB0002100	544-31-0	ko04080
Oleoylethanolamide	Oleoylethanolamide	Fatty amides	326.3061	62.0621	325.2980795	Positive	[M+H]+	C20H39NO2	10.92348	16.03332	17.74752	16.05798	14.7684	13.49064	15.59934	16.06224	16.1199	17.61504	16.01592	20.12946	14.96022	15.41232	12.72852	22.45488	15.8352	22.75392	23.13108	21.71514	-	HMDB0002088	111-58-0	-
Lumichrome	Lumichrome	Heterocyclic compounds	241.0725756	198	242.080376	Negative	[M-H]-	C12H10N4O2	6.93258	5.548554	9.9813	4.650468	5.319102	3.505548	8.74278	8.79354	8.98176	9.87702	10.7478	11.59716	6.36	5.489784	4.516194	4.75755	6.11928	5.056098	5.382978	7.67106	C01727	-	1086-80-2	ko00740
L-Pipecolic-Acid	L-Pipecolic Acid	Heterocyclic compounds	130	84	129.078979	Positive	[M+H]+	C6H11NO2	1312.416	870.834	1197.18	958.956	894.798	1045.842	853.722	1031.916	841.992	1038.6	2096.094	1071.138	1686.942	1564.224	960.3	1565.034	1004.562	1273.716	1052.25	1048.386	C00408	HMDB0000716	3105-95-1	ko00310,ko01100
Thiamine-Monophosphate	Thiamine Monophosphate	Heterocyclic compounds	345	122.2	345.078638	Positive	[M]+	C12H18N4O4PS	110.4408	149.7234	172.881	120.4194	156.489	80.0814	99.6684	90.4488	86.013	82.0686	111.5664	146.9724	94.2552	109.8714	57.43962	97.2786	128.034	87.1878	84.684	86.1954	C01081	HMDB0002666	273724-21-3	ko00730,ko01100,ko01240
Cholic-acid	Cholic acid	Bile acids	407.4	407.4	408.287575	Negative	[M-H]-	C24H40O5	15.5169	5.569038	732.798	503.9538	226.1346	476.6388	12.2874	20.40594	4.109634	155.4648	46.00686	123.282	175.614	143.5968	13.49088	147.2298	352.0968	182.3436	169.2414	237.954	C00695	HMDB0000619	81-25-4	ko00120,ko01100,ko04976
Tetradecanedioic-acid	Tetradecanedioic acid	Fatty Acyls	257.18	239.17	258.18311	Negative	[M-H]-	C14H26O4	9.19842	61.3116	26.27796	11.81112	22.43064	14.20554	8.30556	12.4677	19.31658	10.7991	27.95862	23.1705	27.05334	17.6031	9.15648	20.17104	7.88322	14.19858	12.75948	13.9917	-	HMDB0000872	821-38-5	-
L-Alanine	L-Alanine	Amino acids	90.05	44.05	89.047679	Positive	[M+H]+	C3H7NO2	23041.08	27084.9	18309.48	19533.3	24325.2	27376.98	26289.54	30908.82	31146.24	35469.42	24635.28	26618.28	35673.9	18289.86	30681.6	18095.64	35450.04	25700.64	26550.66	24808.08	C00041	HMDB0000161	56-41-7	ko00250,ko00270,ko00430,ko00450,ko00470,ko00970,ko01100,ko01200,ko01210,ko01230,ko02010,ko04122,ko04974,ko04978,ko05230
IMP	IMP	Nucleotide and Its metabolomics	346.9	78.9	348.047103	Negative	[M-H]-	C10H13N4O8P	1397.64	1046.028	1584.468	1536.858	1278.822	1749.216	2473.53	2443.02	2443.482	3128.274	4447.674	1586.724	1956.888	2610.39	2839.56	1920.606	2086.53	887.598	764.994	1332.09	C00130	HMDB0000175	131-99-7	ko00230,ko01100,ko01232,ko01240,ko01523,ko04742
L-Pyroglutamic-acid	L-Pyroglutamic acid	Amino acids	130.05	84.08	129.042594	Positive	[M+H]+	C5H7NO3	2342.826	3507.894	4596.54	3213.138	2611.374	2892.15	4073.19	4655.154	4019.916	4208.796	5071.026	3793.242	4425.558	3968.592	2612.382	3548.934	4009.914	3138.408	3253.542	3248.694	C01879	HMDB0000267	98-79-3	ko00480,ko01100
Phe-Gly	Phe-Gly	Small Peptide	223.10772	120.0807	222.100443	Positive	[M+H]+	C11H14N2O3	6.99018	6.78804	5.257314	3.56136	5.031402	6.84168	13.82298	15.20184	14.70882	17.59524	18.46764	12.23058	12.45456	9.74922	15.05004	11.4717	9.61134	9.1821	12.40998	10.26462	-	HMDB0028995	721-90-4	-
N,N-dimethylarginine	N,N-dimethylarginine	Amino acid derivatives	203.15025	70.0655	202.142976	Positive	[M+H]+	C8H18N4O2	142.14	117.5856	167.361	133.743	131.8566	143.2518	116.031	135.9798	119.1744	138.996	163.5318	176.1906	148.9908	110.1162	164.9346	171.9156	146.1582	120.7428	121.1958	116.34	-	HMDB0001539	30315-93-6	-
Glu-Glu	Glu-Glu	Small Peptide	277.10303	148.061	276.095753	Positive	[M+H]+	C10H16N2O7	110.0748	144.3204	190.0176	137.544	135.5958	123.0354	110.9754	110.9058	133.215	170.4672	115.2474	110.8194	107.5398	134.9874	48.1788	92.8242	150.924	152.3982	161.0658	113.676	-	HMDB0011737	1116-22-9	-
Glycyl-dl-serine	Glycyl-dl-serine	Small Peptide	163.07133	106.05	162.064058	Positive	[M+H]+	C5H10N2O4	43.80708	30.90006	40.95924	32.70198	31.90704	29.9295	33.86754	37.08198	32.14362	43.28316	49.84398	35.61594	44.37768	35.32572	28.37046	34.75644	32.25696	38.89488	33.77646	31.66632	-	-	687-38-7	-
Alanyl-glutamine	Alanyl-glutamine	Small Peptide	218.11353	147.07	217.106257	Positive	[M+H]+	C8H15N3O4	185.7942	196.3002	222.0612	185.1276	197.8806	190.6686	210.5832	215.115	200.532	220.8018	249.246	209.4282	252.933	238.0356	224.5278	210.3168	192.2466	206.2134	205.8852	197.9514	-	HMDB0028685	39537-23-0	-
Gly-Glu	Gly-Glu	Small Peptide	205.0819	84.0449	204.074623	Positive	[M+H]+	C7H12N2O5	1159.728	1452.552	1599.33	1311.864	1145.01	1435.08	1105.632	918.75	1199.574	1655.208	1028.058	1300.458	1508.154	998.208	893.184	945.588	1314.138	1201.626	1229.346	896.982	-	HMDB0028840	7412-78-4	-
Glycyl-l-glutamine	Glycyl-l-glutamine	Small Peptide	202.08333	140.08	203.090607	Negative	[M-H]-	C7H13N3O4	131.7108	241.179	178.8672	246.603	265.8342	262.0206	378.3246	380.589	369.735	190.1916	146.1354	259.8798	164.4684	136.3428	264.6696	155.8746	462.519	386.709	373.7616	439.1958	-	HMDB0028839	13115-71-4	-
Ala-Ser	Ala-Ser	Small Peptide	175.07243	145.062	176.079708	Negative	[M-H]-	C6H12N2O4	49.74354	42.68988	84.3228	106.8618	82.86	85.5612	29.58894	51.21528	39.25602	65.4366	45.96804	71.8044	56.31558	250.2666	44.37858	40.2774	181.6326	47.1684	60.714	59.15694	-	HMDB0028696	3303-41-1	-
Glycyl-DL-phenylalanine	Glycyl-DL-phenylalanine	Amino acid derivatives	223.10772	120.0812	222.100443	Positive	[M+H]+	C11H14N2O3	1.284468	1.050972	1.12506	0.713592	0.846522	0.952626	1.097448	1.225242	0.977058	1.67109	2.183754	1.475952	1.653954	1.32522	1.093668	1.25997	1.104384	0.947028	0.737856	0.841104	-	HMDB0028848	721-66-4	-
Ala-Gly	Ala-Gly	Small Peptide	145.06187	74.0249	146.069143	Negative	[M-H]-	C5H10N2O3	159.2118	162.9714	152.5836	168.7428	161.4234	156.1524	160.2906	157.0578	154.9716	148.0458	157.4496	190.1106	146.4348	185.2746	156.8328	144.6	179.0052	136.4088	147.042	161.7768	-	HMDB0006899	687-69-4	-
Leu-Leu	Leu-Leu	Small Peptide	245.18597	86	244.178693	Positive	[M+H]+	C12H24N2O3	1.65273	1.137894	1.100538	1.094238	1.40082	1.100856	4.32096	6.27588	4.95882	2.788074	3.427206	1.993962	2.768982	1.474974	1.926222	1.525554	1.471392	2.362686	2.379174	2.531004	-	HMDB0028933	3303-31-9	-
Cyclo(Pro-Leu)	Cyclo(Pro-Leu)	Small Peptide	211.1441	70	210.136828	Positive	[M+H]+	C11H18N2O2	1.080228	1.676946	1.641438	1.214592	1.743462	1.768956	1.848966	2.003736	1.92168	1.945536	1.017852	1.639446	1.859184	1.129512	1.003104	0.902574	3.390678	1.442304	1.488054	1.529628	-	HMDB0034276	2873-36-1	-
Cyclo(Pro-Phe)	Cyclo(Pro-Phe)	Small Peptide	245.12845	120.0815	244.121178	Positive	[M+H]+	C14H16N2O2	13.59954	15.79836	22.18566	14.32206	17.10576	16.27404	25.1139	21.50124	22.85196	36.3753	20.20308	29.79972	12.6039	20.05584	6.042	9.78078	20.01096	16.14564	17.69328	16.29936	-	-	3705-26-8	-
3-N-Methyl-L-Histidine	3-N-Methyl-L-Histidine	Amino acid derivatives	170	96	169.085127	Positive	[M+H]+	C7H11N3O2	123.7452	126.675	97.5312	122.1972	124.557	209.0862	180.618	159.879	143.8902	103.9932	226.6788	153.6306	377.2134	148.8276	344.2788	205.3044	206.4024	112.962	125.199	178.5402	C01152	HMDB0000479	368-16-1	ko00340,ko01100
N-Ethylglycine	N-Ethylglycine	Amino acid derivatives	104.07061	58.0659	103.063329	Positive	[M+H]+	C4H9NO2	293.1402	305.2212	349.0464	331.0344	310.4364	244.2732	244.3692	212.724	232.0962	217.323	263.2326	247.0386	242.1558	215.8338	204.7254	284.7306	269.4042	246.0342	247.5912	230.3004	-	HMDB0041945	627-01-0	-
Kynurenic-Acid	Kynurenic Acid	Quinolines and derivatives	190.043	144	189.042594	Positive	[M+H]+	C10H7NO3	14.34708	9.74778	16.49016	8.29764	6.24294	8.61588	9.65268	15.22518	14.46714	8.52468	19.19238	12.45924	24.63264	14.79186	7.65546	11.6787	8.8311	9.9858	10.60308	10.59618	C01717	HMDB0000715	492-27-3	ko00380,ko01100
Xanthurenic-Acid	Xanthurenic Acid	Quinolines and derivatives	204.029684	160	205.037509	Negative	[M-H]-	C10H7NO4	9.22488	5.69133	9.16746	5.069484	3.682776	5.00325	5.481042	7.08612	7.55028	4.867452	7.11312	7.16508	12.05832	9.0048	4.597392	6.0756	4.715286	5.684466	5.86905	5.33961	C02470	HMDB0000881	59-00-7	ko00380
N-Acetyl-L-Tyrosine	N-Acetyl-L-Tyrosine	Amino acid derivatives	224	136	223.084459	Positive	[M+H]+	C11H13NO4	45.51012	50.349	30.0672	62.7906	72.9336	62.931	55.6047	39.61218	39.07344	39.74772	24.19524	37.55628	54.78384	29.15664	16.11444	16.5981	83.9388	40.67706	45.83844	47.47518	C01657	HMDB0000866	537-55-3	-
L-Valine	L-Valine	Amino acids	118.1	72.1	117.078979	Positive	[M+H]+	C5H11NO2	29909.64	26549.64	26200.68	26693.4	28432.38	28885.02	28658.76	25618.62	28856.82	26247.6	44542.44	32889.96	29039.94	21243.84	22310.4	25194.18	36721.14	27851.64	26681.22	26429.76	C00183	HMDB0000883	72-18-4	ko00280,ko00290,ko00770,ko00970,ko01100,ko01210,ko01230,ko01240,ko02010,ko04974,ko04978,ko05230
N-A-Acetyl-L-Arginine	N-A-Acetyl-L-Arginine	Amino acid derivatives	217.1	158	216.122241	Positive	[M+H]+	C8H16N4O3	23.38344	28.81764	12.4917	29.9001	28.55568	19.26324	32.77134	36.17808	36.2583	27.64932	14.8983	20.3946	15.93216	12.42468	18.55992	9.61956	26.7276	9.61632	17.1006	16.5876	-	HMDB0004620	155-84-0	-
BPG	BPG	Phosphoric acids	265	167	266.04	Negative	[M-H]-	C3H8O10P2	37899.72	21081.48	18279.42	16064.22	11797.26	19838.76	13908.66	30715.98	15772.14	24847.26	28437.48	36633.48	66529.8	34054.2	22776.66	26471.88	15453.66	24146.34	27429.48	19534.86	C00364	-	138-81-8	ko00240,ko01100,ko01232,ko01523
2-Phospho-D-glyceric-acid	2-Phospho-D-glyceric acid	Phosphoric acids	184.9	78.8	186.0572	Negative	[M-H]-	C3H7O7P	421.5444	567.8544	268.6326	421.1622	389.3682	372.9714	661.47	690.774	632.448	591.8148	494.106	477.3162	442.3254	420.8016	318.6468	291.1092	450.8022	657.714	543.9252	463.737	C00631	HMDB0003391	3443-57-0	ko00010,ko00030,ko00260,ko00561,ko00630,ko01100,ko01200,ko01230,ko04922,ko05230
Glycerol-3-phosphate	Glycerol 3-phosphate	Phosphoric acids	171	79	172.013677	Negative	[M-H]-	C3H9O6P	6098.94	5909.82	12114.84	5868.882	7503.84	7295.46	6416.28	6810.9	6437.88	10256.22	18306.18	10358.82	13649.64	12484.44	9137.46	9437.52	9660.9	8053.98	7073.04	8235.42	C00093	HMDB0000126	57-03-4	ko00561,ko00564,ko01100,ko02010,ko05231
H-Glu(Leu-OH)-OH	H-Glu(Leu-OH)-OH	Small Peptide	261.14	86.09	260.137223	Negative	[M+H]+	C11H20N2O5	310.3566	299.2422	315.57	277.968	250.3968	309.741	230.1462	196.413	241.962	248.9688	150.0876	287.8134	263.1396	183.3756	155.7078	197.7792	399.5232	234.8214	259.8732	261.357	-	HMDB0011171	2566-39-4	-
Dihydroxyacetone-phosphate	Dihydroxyacetone phosphate	Phosphoric acids	169	96.8	169.998027	Negative	[M-H]-	C3H7O6P	1058.904	1314.168	2371.956	1902.882	1434.612	1874.52	2347.35	2266.356	2398.83	2619.606	7261.86	2184.18	3775.452	2835.372	3720.72	3337.248	2162.16	2071.644	1883.49	1948.626	C00111	HMDB0001473	57-04-5	ko00010,ko00040,ko00051,ko00052,ko00561,ko00562,ko00564,ko00630,ko00640,ko00760,ko01100,ko01200,ko01230
Citicoline	Citicoline	Pyridines and derivatives	489.11461	184.073	488.107335	Positive	[M+H]+	C14H26N4O11P2	105.0378	81.6264	124.4952	113.1924	85.3164	120.6996	80.3514	255.5232	118.9092	142.3914	234.4596	125.0418	121.9134	158.7282	178.8474	115.9224	100.2528	114.7392	123.525	116.112	-	HMDB0001413	987-78-0	-
2-Picolinic-Acid	2-Picolinic Acid	Pyridines and derivatives	124.039854	78.1	123.032029	Positive	[M+H]+	C6H5NO2	17.142	16.46124	23.60016	12.3108	17.60946	17.68668	13.41858	15.28296	13.6605	19.87398	21.6471	20.16204	20.76606	17.18898	11.91744	11.5797	22.85958	14.208	12.33108	12.0048	C10164	HMDB0002243	98-98-6	ko00380,ko01100
1-Methylhistidine	1-Methylhistidine	Amino acid derivatives	170.0924	109.0759	169.085127	Positive	[M+H]+	C7H11N3O2	775.548	640.44	273.1914	667.902	471.111	623.838	505.9908	556.0296	507.8058	301.4226	310.5216	342.8898	425.2248	235.7304	671.226	355.011	489.0678	502.6332	384.2466	659.166	-	HMDB0000001	332-80-9	-
4-Pyridoxic-acid	4-Pyridoxic acid	Pyridines and derivatives	184.06	148.04	183.053159	Positive	[M+H]+	C8H9NO4	10.80186	19.05606	19.08504	14.21862	20.23662	18.77856	31.47906	24.56148	23.64588	23.86278	39.24018	25.60446	29.2617	20.86236	17.73654	19.73064	18.58434	17.53974	20.42208	18.94668	-	HMDB0000017	82-82-6	-
2-octanamidoacetic-acid	2-octanamidoacetic acid	Amino acid derivatives	200.12922	74.0256	201.136494	Negative	[M-H]-	C10H19NO3	46.37274	8.42808	88.899	40.48866	41.45292	33.0075	6.99894	5.81412	7.12854	11.08752	4.268484	19.9893	6.51534	27.53682	1.121844	18.13326	5.901324	20.8062	16.03668	18.60174	-	HMDB0000832	14246-53-8	-
N-(3-Indoleacetyl)glycine	N-(3-Indoleacetyl)glycine	Amino acid derivatives	231.07752	74.0258	232.084793	Negative	[M-H]-	C12H12N2O3	47.65614	23.85666	103.221	63.3096	61.4262	52.79418	85.0686	69.9054	48.72882	69.6102	54.9129	127.5714	271.782	37.04046	58.19844	24.6585	81.4686	83.949	72.2478	77.0004	-	HMDB0240661	13113-08-1	-
Biopterin	Biopterin	Pyridines and derivatives	238.09	178	237.08619	Positive	[M+H]+	C9H11N5O3	7.3071	12.58674	12.64488	15.39204	9.048	13.10958	13.14132	10.40094	7.57608	14.94726	21.28476	14.34738	26.42412	12.18846	8.1033	9.8778	11.36892	7.1895	10.07478	8.32902	C06313	HMDB0000468	22150-76-1	ko00790,ko01100,ko01240
gamma-Glu-Met	gamma-Glu-Met	Small Peptide	279.2	150	278.093643	Positive	[M+H]+	C10H18N2O5S	148.0134	149.6616	152.2908	144.252	184.938	157.401	110.8938	88.0674	101.301	124.806	57.25464	160.4772	92.0712	75.8244	56.94858	75.6708	164.0478	103.8366	114.7326	116.8242	-	HMDB0034367	17663-87-5	-
Leu-Val	Leu Val	Small Peptide	231	86	230.163043	Positive	[M+H]+	C11H22N2O3	0.880614	0.732822	0.5912166	0.644256	0.777942	1.22043	0.884778	1.350774	1.004826	1.581102	1.442514	1.380594	0.894408	1.301874	1.458282	0.847284	1.423548	1.004472	1.220484	0.899238	-	HMDB0028942	13588-95-9	-
Glutathione-Oxidized	Glutathione Oxidized	Small Peptide	613.152	484	612.151964	Positive	[M+H]+	C20H32N6O12S2	16483.2	25418.1	33133.02	23184.78	18233.1	22612.92	22414.44	22336.44	26692.08	28167.48	50601.24	27105	33529.38	29626.38	18139.32	22308.84	24370.08	24303.72	22824	17110.74	-	HMDB0003337	121-24-4	-
Mannitol	Mannitol	Sugar Alcoholss	181.07176	101.024	182.07904	Negative	[M-H]-	C6H14O6	538.9554	955.848	891.786	684.084	746.22	723.732	1175.55	1235.586	1198.902	1430.898	1454.43	1338.906	1462.302	1208.502	1015.728	823.026	1173.102	924.582	995.79	977.61	-	HMDB0000765	69-65-8	-
D-Glucoronic-Acid	D-Glucoronic Acid	Sugar Alcoholss	193.04	59.01	194.042655	Negative	[M-H]-	C6H10O7	95.445	200.901	181.6218	179.7378	186.864	154.821	126.7524	158.3208	123.486	111.0816	135.429	174.684	176.7654	146.7642	95.496	139.194	138.3336	169.416	148.5696	134.6622	-	HMDB0000127	6556-12-3	-
Sphinganine	Sphinganine	Amines	302.31	284.3	301.298079	Positive	[M+H]+	C18H39NO2	82.4568	57.38676	17.70402	56.92734	58.61844	51.1434	52.5618	37.70562	84.471	52.34718	14.25612	16.065	12.35616	13.90512	72.5916	28.84908	60.1524	67.8966	70.1838	72.6972	-	HMDB0000269	764-22-7	-
Ribonic-acid	Ribonic acid	Sugar acids	165.04	75.01	166.04774	Negative	[M-H]-	C5H10O6	34.4955	43.76928	38.01396	37.9179	41.65764	33.0966	41.83386	50.21718	38.44932	36.55356	44.77284	39.20736	46.23918	35.92002	41.81088	28.80174	35.27406	34.2705	39.58506	36.3108	-	HMDB0000867	642-98-8	-
Trimethylamine-N-Oxide	Trimethylamine N-Oxide	Amines	76	58.1	75.068414	Positive	[M+H]+	C3H9NO	214.2282	266.1588	281.6256	296.1438	243.6564	245.8926	308.7222	302.3418	246.1548	283.5012	503.4492	269.514	308.8224	405.4032	458.0946	100.2606	220.9938	461.2326	428.4708	451.7898	C01104	HMDB0000925	1184-78-7	ko01100
Threonic-acid	Threonic acid	Sugar acids	135.03	75.01	136.037175	Negative	[M-H]-	C4H8O5	321.0048	383.6394	359.7348	348.1818	380.598	230.442	270.63	274.0668	280.0434	195.4356	252.9678	244.9848	229.6542	216.732	209.7816	294.24	287.8554	277.8066	271.9308	277.9158	-	HMDB0000943	70753-61-6	-
Sorbitol	Sorbitol	Sugar Alcoholss	181.07176	59.0139	182.07904	Negative	[M-H]-	C6H14O6	931.902	1530.522	1537.662	1177.344	1218.894	1288.89	1706.532	1806.846	1815.024	2223.894	2244.42	2078.364	2269.404	1891.884	1541.718	1401.96	1901.046	1555.992	1555.488	1604.508	-	HMDB0000247	50-70-4	-
Ethanolamine	Ethanolamine	Amines	62	44	61.052764	Positive	[M+H]+	C2H7NO	355.9602	398.199	305.7258	365.1078	382.0566	432.6036	380.0754	467.0322	382.5312	421.089	404.952	432.2364	427.2612	320.9574	405.1704	410.6988	417.8208	379.1016	365.613	327.1746	C00189	HMDB0000149	141-43-5	ko00564,ko01100,ko04723
Xylonate	Xylonate	Sugar acids	165.04	75	166.04774	Negative	[M-H]-	C5H10O6	1697.988	1514.802	3548.91	1180.368	1469.448	2004.06	1284.972	1679.34	1369.038	3245.358	6037.74	2841.348	7915.56	3763.278	1536.678	3444.306	1398.534	2148.906	1611.63	1532.502	C00502	HMDB0059750	526-91-0	ko00040,ko01100
Histamine	Histamine	Amines	112.087472	68.2	111.079647	Positive	[M+H]+	C5H9N3	95.949	95.5266	98.5722	92.3454	91.86	94.0218	92.6514	92.4984	93.483	100.9068	109.0002	100.5174	124.1436	100.8132	95.6376	101.9094	93.6096	98.8482	94.17	93.1794	C00388	HMDB0000870	51-45-6	ko00340,ko01100,ko04080,ko04664,ko04721,ko04750,ko04971,ko04974,ko05310
Indoxyl-sulfate	Indoxyl sulfate	Sulfonic acids	212	132.05	213.009579	Negative	[M-H]-	C8H7NO4S	1653.978	1624.938	1634.568	1735.17	1197.678	3093.27	892.686	1405.8	776.328	1746.876	2766.3	2558.442	3341.112	4518.438	2145.174	2304.906	2968.89	1954.08	1798.974	1761.996	-	HMDB0000682	487-94-5	-
Taurine	Taurine	Sulfonic acids	124	80	125.014664	Negative	[M-H]-	C2H7NO3S	77643.6	79906.2	83971.8	81794.4	93597	100456.8	79672.2	84732.6	94435.8	100446.6	95160.6	88497	95391.6	131845.2	89991.6	91780.2	119835	91832.4	94108.8	85727.4	C00245	HMDB0000251	107-35-7	ko00120,ko00430,ko00920,ko01100,ko02010,ko04080
Myo-Inositol	Myo-Inositol	Alcohols and polyols	179	161	180.06339	Negative	[M-H]-	C6H12O6	1354.29	984.516	1761.054	1289.52	980.892	874.446	1205.88	1343.508	1449.132	612.96	1161.504	1129.458	998.262	1032.786	845.544	852.468	665.976	912.708	930.426	1019.718	C00137	HMDB0000211	87-89-8	ko00052,ko00053,ko00562,ko01100,ko01250,ko02010,ko04070
Pantothenic-acid	Pantothenic acid	Alcohols and polyols	218.1	88	219.110674	Negative	[M-H]-	C9H17NO5	1081.71	932.97	926.946	930.882	1111.11	1147.902	1219.14	1659.006	1418.238	1102.248	1770.096	1234.806	1770.912	1810.86	922.368	928.602	1029.498	1116.966	1031.988	975.144	C00864	HMDB0000210	79-83-4	ko00410,ko00770,ko01100,ko01240,ko04977
Erythronic-acid	Erythronic acid	Sugar acids	135.03	75.01	136.037175	Negative	[M-H]-	C4H8O5	127.2954	156.5046	146.265	134.7162	159.1554	107.4522	112.9368	118.4658	113.4294	76.6788	107.7828	100.5444	88.6968	89.358	80.2194	128.673	115.7664	111.4956	113.2848	116.373	-	HMDB0000613	488-16-4	-
L-2-Aminoadipate	L-2-Aminoadipate	Amino acid derivatives	162.07608	98.0604	161.068809	Positive	[M+H]+	C6H11NO4	528.0414	414.5514	547.017	350.7552	367.3452	378.849	365.4054	391.0176	380.5656	405.7266	571.272	420.3594	403.857	651.522	375.6294	461.7876	450.1896	599.9322	533.0094	406.3722	-	HMDB0000510	1118-90-7	-
Benzamide	Benzamide	Amines	122.0597	105.03	121.052764	Positive	[M+H]+	C7H7NO	7.18398	7.1964	9.59016	7.07502	6.06498	9.4488	7.36242	7.32252	5.423928	8.12214	16.37754	9.75486	16.20234	11.01594	7.29012	9.93438	7.27914	6.19038	5.475	5.91927	C09815	HMDB0004461	55-21-0	-
Gly-Thr	Gly-Thr	Small Peptide	175.07243	131.0491	176.079708	Negative	[M-H]-	C6H12N2O4	388.1712	412.9602	411.63	404.823	397.446	413.9448	420.4878	401.4606	404.6946	415.4646	425.3874	458.43	455.4774	424.5102	406.521	418.0914	436.7592	375.8586	383.1066	406.0422	-	HMDB0028851	7093-70-1	-
Anserine	Anserine	Small Peptide	241	170	240.122241	Positive	[M+H]+	C10H16N4O3	52.64604	54.09828	56.89542	49.52112	58.24266	140.748	92.0988	101.3502	117.9294	104.2548	317.1414	120.4254	121.965	146.7978	156.7728	95.5896	132.297	171.4464	107.7108	105.4236	C01262	HMDB0000194	584-85-0	ko00340,ko00410,ko01100
gamma-Glutamyl-valine	gamma-Glutamyl-valine	Amino acid derivatives	247.13	72.08	246.121573	Positive	[M+H]+	C10H18N2O5	115.0374	136.5438	180.546	131.3094	107.7006	135.6348	86.1402	79.9284	104.6082	167.1294	112.1016	119.6898	111.2934	112.5744	62.508	92.04	137.6256	95.1474	94.926	95.2512	-	HMDB0011172	2746-34-1	-
Thr-Leu	Thr-Leu	Small Peptide	233.14958	74.0604	232.142308	Positive	[M+H]+	C10H20N2O4	2.337348	1.999416	2.17356	1.979058	2.02014	2.403768	2.190588	3.156198	2.380698	2.979654	3.02103	2.431548	2.3121	2.5299	2.96694	2.481186	2.02164	2.275092	2.431146	3.23166	-	HMDB0029065	50299-12-2	-
Phenaceturic-acid	Phenaceturic acid	Amino acid derivatives	194.1	91.1	193.073894	Positive	[M+H]+	C10H11NO3	1403.754	2202.306	2190.822	3183.684	1633.71	2795.76	1003.128	2336.346	1084.98	1887.69	2925.048	1753.302	3497.292	3367.356	3243.768	1503.474	4354.128	2191.464	2549.208	2391.03	C05598	HMDB0000821	500-98-1	ko00360
gamma-Glu-Phe	gamma-Glu-Phe	Small Peptide	295.13	120.08	294.121573	Positive	[M+H]+	C14H18N2O5	347.022	290.5368	326.5566	300.8202	294.9366	301.6638	259.6638	283.383	270.2286	269.6052	177.1746	340.11	243.7482	207.9714	170.9382	192.609	390.4956	255.546	274.2726	267.7656	-	HMDB0000594	7432-24-8	-
Pro-Gly	Pro-Gly	Small Peptide	173.09207	70.0653	172.084793	Positive	[M+H]+	C7H12N2O3	66.615	66.4068	63.5358	30.78402	56.20332	58.74672	70.3182	73.1022	57.82896	64.4292	80.3496	67.0986	76.2288	43.78986	64.4724	50.76558	72.4182	82.974	87.5238	70.2414	-	HMDB0011178	2578-57-6	-
Spermidine	Spermidine	Amines	146.4	112	145.157897	Positive	[M+H]+	C7H19N3	1358.562	1067.046	952.392	931.164	1194.612	1799.568	1183.488	1450.296	1644.084	2427.228	2488.476	1845.984	1731.852	1911.222	1819.662	1364.952	1628.766	1839.042	1528.476	1516.038	C00315	HMDB0001257	124-20-9	ko00330,ko00410,ko00480,ko01100,ko02010,ko04976
L-Cysteinesulfinic-acid	L-Cysteinesulfinic acid	Amino acid derivatives	152.0023	88.0409	153.009579	Negative	[M-H]-	C3H7NO4S	1894.302	1869.048	1876.794	1855.716	1866.666	1879.782	1866.042	1858.218	1873.242	1915.854	1880.754	1887.984	1889.634	1867.308	1866.942	1872	1865.67	1871.706	1867.56	1872.09	-	HMDB0000996	1115-65-7	-
Urea	Urea	Amines	61	44	60.032363	Positive	[M+H]+	CH4N2O	98386.2	96692.4	112103.4	100492.2	101217.6	113016	101923.8	106635	101649	117687.6	141709.2	128227.8	139745.4	138457.2	108897.6	132672.6	118920.6	115699.8	114555	95384.4	C00086	HMDB0000294	57-13-6	ko00220,ko00230,ko00240,ko00330,ko00780,ko01100,ko02010
Gly-Gly	Gly-Gly	Small Peptide	133.06077	76.0399	132.053493	Positive	[M+H]+	C4H8N2O3	51.17856	46.98666	64.4748	50.5296	52.5018	43.9626	54.45144	48.97788	47.05584	52.00176	66.261	54.79128	55.04784	56.2596	50.91984	46.95138	52.90716	49.60608	49.09098	49.2408	-	HMDB0011733	556-50-3	-
Pro-Ala	Pro-Ala	Small Peptide	187.10772	70.0655	186.100443	Positive	[M+H]+	C8H14N2O3	7.58616	4.423086	3.936588	2.921484	3.749478	6.87966	3.98961	4.970364	4.616388	9.06744	8.03532	4.840266	12.79338	6.15018	5.732466	6.4131	6.3675	6.45576	5.846832	5.258628	-	HMDB0029010	6422-36-2	-
His-Leu	His-Leu	Small Peptide	269.16082	110.0709	268.153541	Positive	[M+H]+	C12H20N4O3	6.05124	5.023836	8.9166	3.81312	3.231888	7.6623	13.34778	12.89622	20.0733	17.98506	23.00754	11.47752	13.79364	12.36276	7.24344	7.93392	9.43026	7.59468	9.65868	9.12336	-	HMDB0028889	7763-65-7	-
His-Ala	His-Ala	Small Peptide	227.11387	110.0712	226.106591	Positive	[M+H]+	C9H14N4O3	2.603832	2.019432	3.61938	1.923618	2.291682	4.87041	3.544356	3.174402	4.111884	4.958478	5.081124	4.034328	3.773706	4.199508	2.62926	2.428584	3.846618	2.831562	2.797446	2.912832	-	HMDB0028878	16874-75-2	-
1-methylhistamine	1-methylhistamine	Amines	126.1012315	68.0495	125.09475	Positive	[M+H]+	C6H13Cl2N3	61.1556	56.43702	56.68872	60.4764	57.23316	53.6331	72.2742	68.9016	80.5086	63.4608	85.9596	67.7934	74.5998	57.61932	110.7654	80.109	61.791	64.0998	56.73774	65.298	C05127	-	6481-48-7	ko00340,ko01100
Choline	Choline	Amines	104.107539	60.1	104.107539	Positive	[M]+	C5H14NO+	21768	29092.26	35231.94	26556.54	28692.9	27624.6	29124.42	29760.54	29607.3	31321.08	47140.56	34877.04	44440.38	39710.28	29822.1	38693.16	30039.54	28074.24	26448.06	26115.72	C00114	HMDB0000097	62-49-7	ko00260,ko00564,ko01100,ko02010,ko04725,ko04976,ko05231
beta-Homoproline	beta-Homoproline	Amino acid derivatives	130.08626	70.0659	129.078979	Positive	[M+H]+	C6H11NO2	9.63336	20.16516	12.73584	15.76494	15.83514	22.96986	18.80814	22.39722	17.82498	21.93306	14.21058	17.65182	14.43156	11.32302	24.3747	13.25616	25.19568	21.29208	18.8841	19.64466	-	HMDB0029444	56879-46-0	-
D-Glucose-6-phosphate	D-Glucose 6-phosphate	Phosphate sugars	258.74	96.9	260.029722	Negative	[M-H]-	C6H13O9P	59.29176	57.88926	59.8194	57.58614	57.6708	59.18088	58.0017	58.30656	59.31252	62.9142	65.652	60.9222	62.7324	61.7064	59.02374	58.26744	58.16208	81.0462	66.4758	59.03094	C00092	HMDB0001401	56-73-5	ko00500,ko00524,ko00562,ko01100,ko04911,ko04917,ko04918,ko04931,ko04973,ko05230,ko05415
Sedoheptulose-7-phosphate	Sedoheptulose 7-phosphate	Phosphate sugars	289.03301	96.97	290.040287	Negative	[M-H]-	C7H15O10P	230.1492	425.2248	292.7286	362.2296	435.3612	255.3702	243.1686	286.0374	589.8762	207.0648	157.4262	413.9814	335.058	273.0954	221.0904	196.7706	330.6816	416.5044	414.2808	235.7454	-	HMDB0001068	2646-35-7	-
N-acetyltryptophan	N-acetyltryptophan	Amino acid derivatives	247.11	188.07	246.100443	Positive	[M+H]+	C13H14N2O3	113.5458	62.8182	59.7288	66.8214	70.7436	104.6178	133.7898	115.095	137.6028	61.2696	171.7848	86.0238	167.445	123.6684	119.736	105.6504	72.1302	109.8966	96.0144	96.3948	-	HMDB0013713	1218-34-4	-
Succinic-Acid	Succinic Acid	Organic acid And Its derivatives	117.02	73.03	118.02661	Negative	[M-H]-	C4H6O4	2403.126	3097.566	2597.214	2858.784	2618.25	3141.708	3706.98	5792.538	4691.622	3437.004	3254.376	3787.338	2989.038	3167.478	2617.386	3201.402	4618.11	3358.572	3072.582	3369.618	-	HMDB0000254	110-15-6	-
L-Lactic-acid	L-Lactic acid	Organic acid And Its derivatives	89.02	43.02	90.031695	Negative	[M-H]-	C3H6O3	273217.8	339719.4	308574.6	352027.2	367744.2	360757.8	403927.2	424163.4	512841.6	466673.4	446658.6	446480.4	403254.6	451725.6	306150	283383.6	392655	373462.8	329086.2	343953	-	HMDB0000190	79-33-4	-
Hexanoyl-Glycine	Hexanoyl Glycine	Amino acid derivatives	174.1	99	173.105194	Positive	[M+H]+	C8H15NO3	491.808	119.6178	651.336	436.5096	372.579	372.0312	147.4494	76.542	131.1192	133.8012	41.69088	248.0424	76.5228	214.4022	22.1229	157.6974	77.6532	224.5938	222.732	224.6898	-	HMDB0000701	24003-67-6	-
Aconitate	Aconitate	Organic acid And Its derivatives	173.01	85.03	174.01644	Negative	[M-H]-	C6H6O6	12281.28	11110.38	19308.84	14598.78	12117.54	12310.68	11140.2	10752.18	11821.98	12598.56	16894.86	16604.1	16867.56	16734.96	8814.06	11625.24	12020.94	11836.02	11328.78	11135.82	-	HMDB0000072	585-84-2	-
2-Aminoisobutyric-Acid	2-Aminoisobutyric Acid	Amino acid derivatives	104.3	58	103.063329	Positive	[M+H]+	C4H9NO2	295.4748	194.3076	400.0482	204.633	151.2312	268.7898	143.2218	142.5432	145.1322	183.4362	181.029	173.2662	202.9086	186.7878	136.4628	299.6544	232.9356	225.5274	216.4104	163.1946	C03665	HMDB0001906	62-57-7	-
Beta-Alanine	Beta-Alanine	Amino acid derivatives	90.2	30	89.047679	Positive	[M+H]+	C3H7NO2	193.8522	275.0604	196.8306	196.419	192.579	209.814	228.8418	241.9536	271.7988	347.9016	161.7294	285.7794	113.6496	145.887	139.803	126.7266	256.0122	446.943	448.8726	263.5848	C00099	HMDB0000056	107-95-9	ko00240,ko00410,ko00640,ko00770,ko01100,ko01240,ko04080,ko04974
Guanidinoacetic-acid	Guanidinoacetic acid	Organic acid And Its derivatives	118.06	76	117.053827	Positive	[M+H]+	C3H7N3O2	93.3258	80.4804	140.4582	104.4288	116.7426	85.722	132.933	126.7422	140.4306	134.8722	269.0184	140.718	248.5398	118.1778	149.46	147.0024	134.6478	154.44	133.1442	118.977	C00581	HMDB0000128	352-97-6	ko00260,ko00330,ko01100
3-Hydroxybutyric-Acid	3-Hydroxybutyric Acid	Organic acid And Its derivatives	103.1	59	104.047345	Negative	[M-H]-	C4H8O3	39794.1	4071.228	55118.04	37710	32649.6	19142.34	6676.92	2916.93	4359.798	7726.26	4106.028	9799.8	6100.32	24953.58	1025.04	26060.58	3077.928	15699.96	15454.5	15428.4	-	HMDB0000011	625-71-8	-
N-Acetyl-L-glutamic-acid	N-Acetyl-L-glutamic acid	Amino acid derivatives	188	102	189.063724	Negative	[M-H]-	C7H11NO5	2799.318	2604.09	3624.786	2329.35	1871.016	2366.808	2098.08	3442.206	2550.384	2122.992	2345.892	3085.746	3150.636	4789.206	1338.114	2344.302	2917.08	3349.578	2978.682	2261.016	C00624	HMDB0001138	1188-37-0	ko00220,ko00470,ko01100,ko01210,ko01230
2-Aminooctanoic-acid	2-Aminooctanoic acid	Organic acid And Its derivatives	160.1	114.1	159.125929	Positive	[M+H]+	C8H17NO2	48.92268	64.473	39.77154	42.95004	48.29358	38.06664	60.3846	37.16058	47.11068	65.3058	63.1368	45.08538	41.5323	48.5376	37.81968	63.2424	34.10298	50.49744	47.07798	43.56558	-	HMDB0000991	644-90-6	-
N-Formylglycine	N-Formylglycine	Amino acid derivatives	104.03	58.03	103.026944	Positive	[M+H]+	C3H5NO3	517.2252	654.882	884.796	731.592	723.366	556.629	659.868	623.562	689.106	513.7008	715.2	677.31	583.4754	586.1814	536.2164	691.218	675.648	618.486	524.6136	648.606	-	-	2491-15-8	-
N-acetylalanine	N-acetylalanine	Amino acid derivatives	130.05	88.04	131.058244	Negative	[M-H]-	C5H9NO3	76.9242	74.6148	70.6686	83.9256	82.4202	71.2188	84.2214	78.78	80.85	67.7484	75.2256	73.7034	67.1688	59.14134	75.291	67.8036	69.6078	76.0116	88.3998	74.922	-	HMDB0000766	97-69-8	-
L-Cystathionine	L-Cystathionine	Amino acid derivatives	223.07	134	222.067428	Positive	[M+H]+	C7H14N2O4S	3875.232	3835.74	4090.404	3832.782	3826.11	3914.046	3852.528	3815.604	3823.95	4000.938	4011.354	4093.794	4011.588	3943.428	3814.272	3881.172	3855.672	4030.38	3879.06	3831.096	C02291	HMDB0000099	56-88-2	ko00260,ko00270,ko01100,ko01230,ko01240
4-Guanidinobutanoic-acid	4-Guanidinobutanoic acid	Organic acid And Its derivatives	146.0924	86.0603	145.085127	Positive	[M+H]+	C5H11N3O2	2.604198	6.1761	5.517852	8.18802	5.39643	7.3269	5.807736	9.28956	7.81068	9.39042	19.635	4.831866	20.16738	3.058452	10.82418	16.03494	4.402944	10.66836	11.38896	6.44754	-	HMDB0003464	463-00-3	-
Hydroxyphenyllactic-acid	Hydroxyphenyllactic acid	Organic acid And Its derivatives	181.1	135.1	182.05791	Negative	[M-H]-	C9H10O4	108.9738	95.6598	160.7472	123.8814	112.2672	147.3828	106.1082	122.019	124.4238	122.7966	195.609	150.621	197.8716	149.9688	87.9528	98.6094	131.1192	130.3152	118.8486	110.1402	C03672	HMDB0000755	306-23-0	-
Cysteine-glutathione-disulfide	Cysteine-glutathione disulfide	Amino acid derivatives	427.09518	298.0512	426.087906	Positive	[M+H]+	C13H22N4O8S2	2226.186	2284.218	2910.768	1525.224	861.756	2988.39	3414.828	1561.926	3645.408	8128.74	6835.44	4750.434	2324.814	2494.53	2043.36	1968.792	2957.868	4053.366	3494.616	2366.412	-	HMDB0000656	13081-14-6	-
Ferulic-Acid	Ferulic Acid	Organic acid And Its derivatives	193.05	134.04	194.05791	Negative	[M-H]-	C10H10O4	8.64834	11.69154	3.568164	4.67481	3.049092	10.39944	4.602474	10.14084	13.19262	8.6337	1.420986	16.61832	17.835	1.839588	3.381084	1.269114	27.51846	7.5918	8.06886	7.5936	-	HMDB0000954	1135-24-6	-
GMP	GMP	Nucleotide and Its metabolomics	361.9	210.9	363.058002	Negative	[M-H]-	C10H14N5O8P	3832.224	4132.764	4038.384	4236.75	4275.258	3921.798	4284.558	4384.128	4678.32	3886.536	4372.284	3990.342	4243.488	3948.804	4131.426	4049.91	4453.14	4068.072	4583.544	4103.784	C00144	HMDB0001397	85-32-5	ko00230,ko01100,ko01232,ko01523,ko04022,ko04740,ko04742,ko04744
H-Lys(Me)-OH-chloride	H-Lys(Me)-OH chloride	Amino acid derivatives	189.1617	84.082	224.73	Positive	[M-Cl]+	C9H20N2O2	232.5594	225.8178	422.0022	243.9318	229.272	294.8514	240.7302	246.711	204.0942	303.939	608.19	366.8496	580.3002	479.67	306.7236	406.4106	245.8806	262.077	203.5074	224.049	-	-	55528-53-5	-
AMP	AMP	Nucleotide and Its metabolomics	345.9	79	347.063087	Negative	[M-H]-	C10H14N5O7P	4365.942	4075.866	4675.8	4620.09	5108.658	6321.18	7747.86	7152.3	8605.56	8339.58	16845.06	9932.46	15491.58	10342.86	13653.78	10230.12	9304.32	8653.2	6781.74	5156.214	C00020	HMDB0000045	61-19-8	ko00230,ko01100,ko01232,ko01240,ko01523,ko04022,ko04024,ko04068,ko04150,ko04151,ko04152,ko04211,ko04740,ko04742,ko04923,ko04924,ko04925,ko04927,ko04928,ko04934,ko05012,ko05022,ko05032
5-Methylcytosine	5-Methylcytosine	Nucleotide and Its metabolomics	126.1	109	125.058912	Positive	[M+H]+	C5H7N3O	86.6892	81.8676	81.3912	85.683	82.6362	79.209	95.0772	93.4566	105.1794	88.2516	108.366	91.7664	98.5794	82.0884	137.8638	107.4984	86.7852	89.1294	81.9186	90.1488	C02376	HMDB0002894	554-01-8	ko00240,ko01100
3-methylcytidine	3-methylcytidine	Nucleotide and Its metabolomics	258.11	126.07	257.101172	Positive	[M+H]+	C10H15N3O5	41.29638	43.78602	111.4512	42.66036	38.5158	49.275	44.89044	55.39884	38.77866	42.10032	120.7128	86.481	90.4692	66.0654	34.60746	60.7362	41.72358	42.53106	40.76058	44.19504	-	HMDB0240577	2140-64-9	-
Cyclic-AMP	Cyclic-AMP	Nucleotide and Its metabolomics	328.1	134.2	329.052522	Negative	[M-H]-	C10H12N5O6P	51.74556	28.2228	73.593	34.13826	40.48146	45.52968	42.1905	47.81478	49.96932	54.2985	79.0014	67.2618	86.2494	78.2682	36.6255	54.55074	30.27024	37.81146	39.79236	37.1355	C00575	HMDB0000058	60-92-4	ko00230,ko01100,ko01522,ko04010,ko04014,ko04015,ko04020,ko04022,ko04024,ko04062,ko04072,ko04114,ko04211,ko04213,ko04261,ko04270,ko04340,ko04371,ko04540,ko04611,ko04670,ko04710,ko04713,ko04714,ko04720,ko04723,ko04724,ko04725,ko04726,ko04727,ko04728,ko04740,ko04742,ko04750,ko04910,ko04911,ko04912,ko04913,ko04914,ko04915,ko04916,ko04918,ko04919,ko04921,ko04922,ko04923,ko04924,ko04925,ko04926,ko04927…
N-Acetylleucine	N-Acetylleucine	Amino acid derivatives	174.11	86.1	173.105194	Positive	[M+H]+	C8H15NO3	35.48928	33.14196	24.03258	30.21108	25.9458	39.78276	35.3547	28.49604	33.69888	25.69098	23.49084	40.0425	35.13534	24.1155	20.95374	21.4104	59.22336	29.83062	30.75804	29.59242	-	HMDB0011756	1188-21-2	-
Uracil	Uracil	Nucleotide and Its metabolomics	111.2	42	112.027278	Negative	[M-H]-	C4H4N2O2	864.276	775.488	1603.338	889.716	901.728	828.408	1203.612	1139.286	1227.882	1114.674	3130.374	1554.396	1869.918	1265.508	898.572	1332.096	1037.754	1177.77	1002.87	942.96	C00106	HMDB0000300	66-22-8	ko00240,ko00410,ko00770,ko01100,ko01232
Glycolic-acid	Glycolic acid	Organic acid And Its derivatives	75.01	75.01	76.016045	Negative	[M-H]-	C2H4O3	646.35	865.704	1148.982	829.29	822.594	669.666	983.316	976.188	662.832	857.352	1419.6	1258.914	1375.758	1209.708	1035.168	997.158	809.25	1022.082	831.876	863.748	-	HMDB0000115	79-14-1	-
N-Palmitoylglycine	N-Palmitoylglycine	Amino acid derivatives	312.25442	74.0259	313.261694	Negative	[M-H]-	C18H35NO3	3.898242	3.042048	6.75912	4.898346	5.174046	4.141428	2.373702	2.822286	3.712056	5.122788	2.126016	2.582922	2.593944	3.635586	2.554746	4.693236	4.221528	3.341046	2.858064	3.185628	-	HMDB0013034	2441-41-0	-
Kynurenine	Kynurenine	Amino acid derivatives	207.1	189.9	208.084793	Negative	[M-H]-	C10H12N2O3	1337.592	1156.608	1416.09	1166.682	685.014	685.2	835.812	823.074	1130.37	554.9676	1078.05	996.444	1045.614	1343.964	626.364	536.925	807.186	938.352	803.604	806.01	C00328	HMDB0000684	2922-83-0(343-65-7)	ko00380,ko01100,ko01240,ko05143
2-Hydroxyglutaric-acid	2-Hydroxyglutaric acid	Organic acid And Its derivatives	147.0299	129.0192	148.037175	Negative	[M-H]-	C5H8O5	4563.774	6607.38	6999.42	5118.708	4359.9	4171.998	3509.736	4539.408	4381.5	3743.31	7268.76	7589.7	8236.08	11198.22	2367.684	6981.12	5488.962	5028.702	4118.832	4133.574	-	HMDB0000606	63512-50-5	-
4-Aminobutyric-Acid	4-Aminobutyric Acid	Amino acid derivatives	104.071154	87.2	103.063329	Positive	[M+H]+	C4H9NO2	15.30444	17.37666	10.5543	16.84008	15.74064	13.42692	14.78478	18.1617	23.0283	17.42874	10.32558	11.89338	14.63082	9.0498	13.61244	23.36454	21.9702	9.35256	14.12748	16.20054	C00334	HMDB0000112	56-12-2	ko00250,ko00330,ko00410,ko00650,ko00760,ko01100,ko04024,ko04080,ko04721,ko04723,ko04727,ko04742,ko04915,ko04929,ko05032,ko05033
Dimethylglycine	Dimethylglycine	Amino acid derivatives	104.071154	58.07	103.063329	Positive	[M+H]+	C4H9NO2	1109.832	995.154	1270.002	1046.772	954.408	833.898	1018.638	800.118	879.246	955.344	1415.826	802.536	1086.048	797.832	911.676	995.802	666.48	1012.68	891.48	875.88	C01026	HMDB0000092	1118-68-9	ko00260,ko01100
5-Aminovaleric-Acid	5-Aminovaleric Acid	Organic acid And Its derivatives	118.09	55.06	117.078979	Positive	[M+H]+	C5H11NO2	14186.58	12060.84	16304.76	11641.2	12474.12	15076.86	13483.32	11796.3	13008.06	15683.94	20605.8	24042.9	20705.64	16315.08	14007.3	17021.94	21776.04	13240.32	13144.2	13290.96	-	HMDB0003355	660-88-8	-
N-Acetylthreonine	N-Acetylthreonine	Amino acid derivatives	160.06153	74.0251	161.068809	Negative	[M-H]-	C6H11NO4	102.6906	61.4286	118.4394	74.862	56.9544	57.65748	52.54842	52.17666	62.5374	41.28948	58.37502	49.6371	51.3906	64.6068	35.00718	50.31468	41.86488	64.0572	54.49428	50.22576	-	HMDB0062557	17093-74-2	-
Trans-4-Hydroxy-L-Proline	Trans-4-Hydroxy-L-Proline	Amino acid derivatives	132.058	86	131.058244	Positive	[M+H]+	C5H9NO3	2931.294	3904.146	3130.134	2868.186	3929.562	2764.11	2784.996	2336.082	2565.822	2063.4	3528.78	2929.416	1339.776	1496.4	1691.55	1402.002	3578.796	3388.584	3353.244	3212.004	C01157	HMDB0000725	51-35-4	ko00330,ko00470,ko01100,ko02010
Stachydrine-hydrochloride	Stachydrine hydrochloride	Organic acid And Its derivatives	144.1	58	144.102454	Positive	[M]+	C7H14NO2	304.0068	257.5878	326.97	216.7596	314.4366	371.199	321.4164	283.2222	298.7154	302.118	565.1994	242.241	322.2516	255.0582	318.4902	338.211	277.2624	311.6118	279.7686	280.0704	-	HMDB0004827	4136-37-2	-
alpha-Aminoadipic-acid	alpha-Aminoadipic acid	Organic acid And Its derivatives	162.07	98.06	161.068809	Positive	[M+H]+	C6H11NO4	2707.218	1961.64	2574.132	1706.13	1950.3	1904.916	1830.282	1848.924	1892.73	2119.974	2942.31	2186.694	1930.158	3074.424	1895.7	2142.528	2174.658	2710.506	2538.144	1933.284	C00956	HMDB0000510	1118-90-7(542-32-5)	ko00310,ko01100,ko01210,ko01230
Ureidopropionic-acid	Ureidopropionic acid	Organic acid And Its derivatives	131.04622	88.0408	132.053493	Negative	[M-H]-	C4H8N2O3	4116.942	3515.97	7475.7	3924.48	3550.926	3427.608	3366.024	3863.46	3771.798	3714.918	3768.342	6260.88	4584.264	6080.94	1508.262	2023.626	5358.132	3758.742	3585.096	3217.236	-	HMDB0000026	462-88-4	-
N-Acetylputrescine	N-Acetylputrescine	Organic acid And Its derivatives	131	114	166.087	Positive	[M-Cl]+	C6H14N2O	2.226702	1.986708	3.041502	2.251044	2.288568	2.761086	2.18115	2.39922	2.030868	2.55924	3.042858	2.879706	2.763822	2.896404	3.642504	3.045498	2.73411	2.542266	2.021268	1.98225	C02714	HMDB0002064	18233-70-0	ko00330,ko01100
Creatine	Creatine	Organic acid And Its derivatives	132.1	90	131.069477	Positive	[M+H]+	C4H9N3O2	3299.496	3060.768	3299.322	2888.538	3404.982	3591.486	3229.338	2988.444	2901.78	3215.856	4573.44	3566.694	4304.76	3600.258	3354.828	3225.852	3717.204	3856.254	3885.936	3681.378	C00300	HMDB0000064	57-00-1	ko00260,ko00330,ko01100
Orotic-acid	Orotic acid	Organic acid And Its derivatives	155.00983	111.0206	156.017108	Negative	[M-H]-	C5H4N2O4	101.3814	103.0956	148.9836	109.0866	109.77	116.931	154.2768	150.8796	129.1662	121.692	208.1766	147.1134	150.141	127.0272	86.3022	119.2728	121.083	104.3496	114.7236	124.2612	-	HMDB0000226	65-86-1	-
N-(3-Phenylpropionyl)glycine	N-(3-Phenylpropionyl)glycine	Amino acid derivatives	208.09682	105.07	207.089544	Positive	[M+H]+	C11H13NO3	40.08462	16.93704	61.7784	67.3728	63.576	75.9756	33.9459	22.18464	18.34632	135.2562	14.5353	152.976	54.31212	27.85038	13.45434	23.26722	54.02568	42.2463	43.49976	46.61544	-	HMDB0002042	56613-60-6	-
N-Acetyl-L-phenylalanine	N-Acetyl-L-phenylalanine	Amino acid derivatives	208.09682	120.0813	207.089544	Positive	[M+H]+	C11H13NO3	47.43258	37.82994	31.59138	43.26612	52.35744	42.24204	57.22782	44.77284	40.78452	27.87372	44.94894	38.68176	58.5084	34.17726	32.24454	29.4018	46.3077	41.48178	39.3036	38.98962	-	HMDB0000512	2018-61-3	-
3-phenyllactic-acid	3-phenyllactic acid	Organic acid And Its derivatives	165.1	72.7	166.062995	Negative	[M-H]-	C9H10O3	23.0601	22.65888	38.78262	23.07888	35.81826	33.54108	19.42428	29.56692	22.78566	22.69842	51.6942	28.4364	161.1762	22.6542	63.1452	21.52818	21.80496	34.845	37.88868	32.37738	C01479	HMDB0000779	828-01-3	-
3-hydroxyisovaleric-acid	3-hydroxyisovaleric acid	Organicacid and Its derivatives	117.1	59.01	118.062995	Negative	[M-H]-	C5H10O3	74.4648	70.5342	56.2362	61.569	44.26914	44.00394	30.61794	36.99084	34.10346	36.1026	85.9482	44.52372	53.65536	66.7128	48.55272	60.0834	61.6068	52.2522	51.8292	47.03646	-	HMDB0000754	625-08-1	-
2-Methyllactic-acid	2-Methyllactic acid	Organicacid and Its derivatives	103.04	57.1	104.047345	Negative	[M-H]-	C4H8O3	1753.662	1053.426	2012.208	1617.126	1196.49	1352.454	1513.506	1155.876	1349.808	1280.31	1694.706	1794.264	1827.84	1460.844	949.674	2064.048	1225.62	1248.264	1159.302	1156.314	-	HMDB0000729	594-61-6	-
N-Acetyl-DL-valine	N-Acetyl-DL-valine	Amino acid derivatives	160.09682	72.0812	159.089544	Positive	[M+H]+	C7H13NO3	23.56284	21.73194	30.40158	23.39076	21.51144	24.67722	22.64214	18.11496	21.90324	21.89802	34.11288	28.15158	31.1682	28.28496	16.7337	22.54842	23.8572	21.69918	18.40104	19.812	-	HMDB0011757	3067-19-4	-
Diethyl-Glutarate	Diethyl Glutarate	Others	187.1	125.1	188.10486	Negative	[M-H]-	C9H16O4	23.61972	115.3308	63.9162	68.3364	43.74396	59.59038	38.6763	67.3116	76.0536	63.8778	88.539	128.2818	102.2112	60.2526	72.1746	74.4018	82.929	39.83808	39.87258	38.02596	-	HMDB0059879	818-38-2	-
Betaine	Betaine	Others	118.086804	58	117.078979	Positive	[M]+	C5H11NO2	5537.562	9784.8	6153.12	6918.9	6694.26	8264.4	6164.64	8099.64	5929.368	6878.76	7454.22	7565.34	7864.8	3942.36	8751.24	7593	8398.2	7405.5	7298.58	7561.08	C00719	HMDB0000043	107-43-7(6915-17-9)	ko00260,ko01100,ko02010
Galactose-1-phosphate	Galactose 1-phosphate	Phosphate sugars	259.02244	96.9695	260.029722	Negative	[M-H]-	C6H13O9P	4.613118	4.511022	4.654866	4.348242	4.340778	4.609512	4.41222	4.47348	4.625406	5.246838	5.770668	4.748808	5.18277	4.958178	4.554816	4.502886	4.457904	8.5452	6.43932	4.660932	-	HMDB0000645	2255-14-3	-
6-Phosphogluconic-acid	6-Phosphogluconic acid	Phosphate sugars	274.8	78.9	276.024637	Negative	[M-H]-	C6H13O10P	81.918	97.3182	118.0524	92.0136	98.2608	85.3812	110.0082	104.835	116.5332	88.374	89.0334	97.6428	85.719	84.8892	80.2872	90.0198	99.7548	97.9446	96.495	91.998	C00345	HMDB0001316	921-62-0	ko00030,ko01100,ko01200
2-hydroxyisovaleric-Acid	2-hydroxyisovaleric Acid	Organicacid and Its derivatives	117.1	71	118.062995	Negative	[M-H]-	C5H10O3	647.958	644.154	652.662	662.484	545.193	756.636	1185.306	916.248	849.108	480.4998	838.086	577.1418	1170.096	611.658	714.72	641.94	572.8662	753.336	751.044	712.098	-	HMDB0000407	4026-18-0	-
N-Butyrylglycine	N-Butyrylglycine	Amino acid derivatives	144.06662	74.0253	145.073894	Negative	[M-H]-	C6H11NO3	184.1706	55.74606	142.095	120.7986	101.9724	130.3626	50.7489	42.50412	46.35204	63.8982	47.61714	101.8362	50.47692	112.4538	31.40568	74.4696	37.14786	78.8484	74.4726	85.1616	-	HMDB0000808	20208-73-5	-
Creatinine	Creatinine	Organic acid And Its derivatives	114.066	86.071	113.058912	Positive	[M+H]+	C4H7N3O	1178.988	1163.706	1638.42	1169.712	1211.544	1464.39	1413.342	1400.886	1335.996	1575.384	2562.402	1594.116	2080.47	1851.324	1473.888	1494.51	1229.058	1484.136	1354.812	1341.966	C00791	HMDB0000562	60-27-5	ko00330,ko01100
L-Leucic-acid	L-Leucic acid	Organic acid And Its derivatives	131.1	69	132.078645	Negative	[M-H]-	C6H12O3	96.969	72.702	131.8848	81.7374	66.8076	120.963	105.843	95.964	90.7806	81.7098	199.044	108.093	463.6428	131.9772	147.4008	108.243	95.4858	109.9164	101.9082	99.0792	-	HMDB0000746	13748-90-8	-
Methionine-Sulfoxide	Methionine Sulfoxide	Amino acid derivatives	166	74	165.045964	Positive	[M+H]+	C5H11NO3S	270.258	320.6748	257.2344	247.4148	278.9076	385.242	370.455	347.46	347.0634	406.2966	402.2592	461.5788	696.834	221.325	324.3372	250.4334	483.7728	590.7978	685.686	580.7136	-	HMDB0002005	62697-73-8	-
N-Acetylasparagine	N-Acetylasparagine	Amino acid derivatives	173.05678	58.0298	174.064058	Negative	[M-H]-	C6H10N2O4	629.988	646.668	605.37	656.814	627.192	653.904	642.648	616.944	628.086	661.236	595.0116	604.716	611.652	607.914	628.026	607.938	637.65	592.0026	617.58	632.226	-	HMDB0006028	4033-40-3	-
N-Propionylglycine	N-Propionylglycine	Amino acid derivatives	130.05097	74.03	131.058244	Negative	[M-H]-	C5H9NO3	61.9602	24.87768	39.97938	42.81234	39.96576	50.7678	27.0792	27.29328	28.52064	25.19736	17.56038	45.8511	27.8961	26.99844	18.01002	30.95352	27.9405	30.37548	31.78362	25.43712	-	HMDB0000783	21709-90-0	-
GcNeu	GcNeu	Organic acid And Its derivatives	324.09362	116.0355	325.100899	Negative	[M-H]-	C11H19NO10	5200.908	5965.602	8060.64	5076.306	6019.5	5474.58	11476.56	10609.08	12466.92	17713.38	16141.2	7466.76	8902.14	13702.26	6802.38	4758.396	5752.956	8898.06	8481.72	8637.72	-	HMDB0000833	1113-83-3	-
N-Acetylneuraminic-Acid	N-Acetylneuraminic Acid	Organic acid And Its derivatives	310.11	274.09	309.105984	Positive	[M+H]+	C11H19NO9	6129.6	5472.546	7223.16	4968.108	5283.978	4693.464	4305.054	4814.754	5426.01	6933.3	8447.58	5575.014	6818.52	6738.24	5229.714	5277.918	4835.574	7556.94	5055.336	5304.288	C19910	HMDB0000230	131-48-6	-
N6-Acetyl-L-Lysine	N6-Acetyl-L-Lysine	Amino acid derivatives	189.1	126	188.116093	Positive	[M+H]+	C8H16N2O3	375.678	311.8644	423.3138	309.0732	301.4046	348.5676	279.4338	278.8908	230.7162	264.5928	399.3462	345.864	418.3392	348.5886	307.9776	358.3524	358.6776	479.6358	396.9504	397.4322	C02727	HMDB0000206	692-04-6	ko00310,ko01100
1-Amino-1-cyclobutane-carboxylic-acid	1-Amino-1-cyclobutane-carboxylic-acid	Organic acid And Its derivatives	116.07061	70.0655	115.063329	Positive	[M+H]+	C5H9NO2	4944.108	7579.86	5799.978	5075.01	5855.472	6726.66	7110.84	7642.08	7138.74	7692.66	8038.02	7542.06	8231.52	4759.86	6301.62	6747.66	11060.64	6556.38	6449.7	6551.22	-	-	22264-50-2	-
2-Isopropylmalic-acid	2-Isopropyl-malic acid	Organic acid And Its derivatives	175.0612	115.04	176.068475	Negative	[M-H]-	C7H12O5	1.292424	0.738336	0.76956	0.912972	0.846648	0.595353	1.065156	0.882042	1.162158	0.4658478	0.686226	0.5826708	0.71718	0.504324	0.4906812	0.4266006	0.891228	0.697254	0.5926032	0.8211	-	HMDB0000402	3237-44-3	-
S-(5-Adenosy)-L-Homocysteine	S-(5-Adenosy)-L-Homocysteine	Amino acid derivatives	385	136.06	384.121589	Positive	[M+H]+	C14H20N6O5S	21.34758	19.65348	28.05546	20.1927	16.56672	23.00322	18.29202	28.53336	19.54002	50.57664	58.22148	35.40876	51.54024	41.80182	27.73584	30.05694	37.92552	14.44128	23.81634	16.27902	C00021	HMDB0000939	979-92-0	ko00270,ko01100,ko01230,ko01240,ko05208
Argininosuccinic-acid	Argininosuccinic acid	Organic acid And Its derivatives	291.5	176.1	290.122636	Positive	[M+H]+	C10H18N4O6	411.1812	458.385	640.956	472.767	534.5898	614.796	465.6528	552.0078	781.458	705.51	791.676	815.382	824.682	748.236	499.5456	632.01	580.4766	588.6336	710.262	433.8606	C03406	HMDB0000052	2387-71-5	ko00220,ko00250,ko01100,ko01230
B3	Vitamin B3	CoEnzyme and vitamins	124.0393	78.0338	123.032029	Positive	[M+H]+	C6H5NO2	53.85114	52.20816	65.3148	44.30718	57.05298	68.3442	46.44792	56.814	45.99252	61.1616	78.7374	61.4232	84.144	54.00366	33.79896	48.29094	77.4828	43.08546	45.06486	43.23648	-	HMDB0001488	59-67-6	-
5-Hydroxyindoleacetic-Acid	5-Hydroxyindoleacetic Acid	Indole and Its derivatives	192.066069	146	191.058244	Positive	[M+H]+	C10H9NO3	58.55466	37.61772	55.86942	41.0925	51.73638	46.78884	61.7172	53.36454	67.929	39.32148	92.5884	38.48436	N/A	68.4768	78.7254	64.998	45.54162	57.2691	55.96698	54.99192	C05635	HMDB0000763	54-16-0	ko00380,ko01100,ko04726
Asp-Leu	Asp-Leu	Small Peptide	247.12885	201	246.121573	Positive	[M+H]+	C10H18N2O5	3.501132	1.37844	0.911124	N/A	4.681638	4.124976	4.21974	6.1245	10.01652	4.053798	5.435688	5.52993	4.960092	0.3808314	3.38403	2.058978	2.746128	4.361988	3.19248	3.584736	-	-	3062-14-4	-
5-methoxycarbonylmethyl-2-thiouridine	5-methoxycarbonylmethyl-2-thiouridine	Nucleotide and Its metabolomics	333.1	201	332.067823	Positive	[M+H]+	C12H16N2O7S	3.3588	2.836872	3.152898	4.248432	N/A	2.788434	4.25229	4.198626	2.913756	3.832728	3.417282	2.978076	3.621504	2.524146	3.03315	3.433806	2.895774	2.98548	3.32025	2.407284	-	-	20299-15-4	-
Indole-3-carboxylic-acid	Indole-3-carboxylic acid	Indole and Its derivatives	162.06	144.04	161.047679	Positive	[M+H]+	C9H7NO2	15.31512	17.14356	18.57312	14.21196	14.00376	13.65282	17.70846	19.8753	19.50486	N/A	22.50786	21.5958	25.22268	20.3475	14.72358	13.63194	15.85572	15.56862	14.9103	16.00314	C19837	HMDB0003320	771-50-6	-
1-methyladenosine	1-methyladenosine	Nucleotide and Its metabolomics	282.1	150.1	281.112405	Positive	[M+H]+	C11H15N5O4	N/A	0.04282872	2.340954	0.852708	1.056462	1.507374	0.212637	0.2279682	0.224721	1.459386	1.674618	0.858066	2.019006	1.041162	0.3597348	0.884142	0.671826	N/A	N/A	N/A	C02494	HMDB0003331	15763-06-1	-
His-Ser	His-Ser	Small Peptide	243.10878	110	242.101506	Positive	[M+H]+	C9H14N4O4	1.50501	1.690794	1.710888	N/A	1.095516	2.46513	1.302168	1.734258	2.949432	5.118804	3.38793	3.466812	4.145622	2.406576	3.587598	2.41125	2.090292	1.944702	2.81046	2.291418	-	HMDB0028894	21438-60-8	-
Stachyose	Stachyose	Sugars	665.21458	179.0565	666.221865	Negative	[M-H]-	C24H42O21	N/A	349.665	272.826	243.5892	229.2468	556.3422	563.3466	808.74	1097.352	657.132	453.0246	840.408	281.964	159.5478	511.7562	128.088	708.876	486.6066	509.175	470.9322	-	HMDB0003553	470-55-3	-
5,2'-O-dimethyluridine	5,2'-O-dimethyluridine	Nucleotide and Its metabolomics	273.1	127.1	272.100838	Positive	[M+H]+	C11H16N2O6	2.306448	2.806746	13.06992	7.8915	N/A	2.906688	7.67004	5.525958	3.98079	5.000088	7.7559	7.18044	17.31222	7.01916	4.60428	10.3005	3.38697	8.43894	5.97081	5.956044	-	-	55486-09-4	-
Azelaic-acid	Azelaic acid	Fatty Acyls	187.1	187.1	188.10486	Negative	[M-H]-	C9H16O4	33.58344	131.7696	90.2838	79.1658	57.6186	N/A	46.1847	86.478	94.2684	90	105.1464	119.427	111.5178	74.1804	83.8446	93.927	88.3566	56.06142	53.76912	55.32774	-	HMDB0000784	123-99-9	-
4-Methoxy-Estrone	4-Methoxy Estrone	Hormones and hormone related compunds	301.39	283.39	300.172545	Positive	[M+H]+	C19H24O3	173.4012	115.731	N/A	128.7834	150.5778	176.1066	146.7438	134.1486	203.124	179.3922	48.0324	98.4966	61.0734	75.0132	197.5758	89.6124	167.4492	157.4532	164.8122	166.8966	-	-	58562-33-7	-
3-Oxocholic-acid	3-Oxocholic acid	Bile acids	405.3	405.3	406.271925	Negative	[M-H]-	C24H38O5	3.738654	1.724052	42.76146	78.8706	59.99412	50.23992	1.766676	3.799692	N/A	47.84286	6.31818	116.55	79.8216	11.63124	13.11396	31.2858	84.3576	36.34524	34.29138	46.5573	-	HMDB0000502	2304-89-4	-
2-Phenylacetamide	2-Phenylacetamide	Benzene and substituted derivatives	136	91.2	135.068414	Positive	[M+H]+	C8H9NO	6.45348	8.59746	5.936082	4.56306	5.497386	N/A	6.68976	9.64644	6.18714	10.755	14.32146	10.21482	7.50618	7.02024	7.6239	6.84036	8.7045	6.00108	5.54004	7.29492	C02505	HMDB0010715	103-81-1	ko00360,ko01100
Glycochenodeoxycholic-acid	Glycochenodeoxycholic acid	Bile acids	448.3	74	449.314124	Negative	[M-H]-	C26H43NO5	0.0648384	N/A	2.224794	1.636494	0.712314	0.4439478	1.486986	2.024454	0.680802	1.3698	2.201034	2.901444	4.157046	2.689776	0.842514	1.922658	1.913646	N/A	N/A	N/A	C05466	HMDB0000637	640-79-9	ko00120,ko04976,ko04979
N-Acetylaspartate	N-Acetylaspartate	Amino acid derivatives	176.05535	134.0452	175.048074	Positive	[M+H]+	C6H9NO5	234.6588	332.1222	363.4326	334.5426	240.4962	262.1136	288.297	328.0488	380.7414	273.9588	521.1174	294.8214	431.2446	464.304	N/A	231.6408	266.5386	180.9072	266.9016	335.7048	-	HMDB0000812	997-55-7	-
4-hydroxybenzoic-acid	4-hydroxybenzoic acid	Benzene and substituted derivatives	137	93	138.031695	Negative	[M-H]-	C7H6O3	11.18448	7.27074	3.785706	7.83636	4.742028	4.542588	8.79384	7.21476	7.35156	5.628036	4.286658	3.685026	1.939266	3.804468	N/A	4.564062	6.84612	6.2502	8.26158	5.606934	C00156	HMDB0000500	99-96-7	ko00130,ko00790,ko01100,ko01240
1,5-Anhydro-D-Glucitol	1,5-Anhydro-D-Glucitol	Sugar Alcoholss	163.0606735	59	164.068475	Negative	[M-H]-	C6H12O5	6379.68	3902.436	4607.562	4104.72	4513.482	3758.064	N/A	N/A	2920.554	2894.82	3607.944	5471.496	6454.32	5971.65	5055.582	6052.56	3175.146	4146.288	5118.648	4768.248	C07326	HMDB0002712	154-58-5	-
trans-10-Heptadecenoic-acid	trans-10-Heptadecenoic acid	FFA	267.23	267.23	268.24023	Negative	[M-H]-	C17H32O2	163.9986	136.827	414.8496	278.1234	168.3468	254.532	69.7548	N/A	205.431	247.608	167.6166	90.7494	118.0482	205.791	N/A	164.6874	149.0082	280.3938	212.8014	217.7064	-	-	126761-43-1	-
Osbond-acid	Osbond acid	FFA	329.25	329.25	330.25588	Negative	[M-H]-	C22H34O2	N/A	N/A	1353.084	1285.758	1139.928	663.132	662.454	658.458	685.56	518.7366	998.796	707.022	963.318	640.986	658.488	787.764	706.662	682.362	597.1086	907.122	-	-	25182-74-5	-
L-2-PHENYLGLYCINE	L-2-PHENYLGLYCINE	Amino acid derivatives	152.07	79	151.063329	Positive	[M+H]+	C8H9NO2	N/A	19.27968	13.37862	18.94686	12.88068	15.21366	19.23546	23.41044	13.57578	14.20908	16.58538	N/A	23.88474	19.515	21.50652	14.10882	13.99878	18.11544	15.30084	15.33852	-	HMDB0002210	2935-35-5	-
Taurodeoxycholic-acid	Taurodeoxycholic acid	Bile acids	498.3	79.8	499.296759	Negative	[M-H]-	C26H45NO6S	200.7384	442.8744	448.5516	830.064	2862.168	683.124	N/A	33.91572	N/A	471.4644	172.8618	429.2046	596.025	298.2342	185.9898	631.116	226.26	541.4076	477.1734	472.1598	C05463	HMDB0000896	516-50-7	-
Deoxycholic-acid	Deoxycholic acid	Bile acids	391.29	391.28	392.29266	Negative	[M-H]-	C24H40O4	17.17704	16.6806	70.3992	114.4302	160.767	60.6894	N/A	8.47338	N/A	46.9902	7.41672	55.17438	94.602	59.97192	14.78268	62.4966	56.2548	52.46856	42.29652	48.79158	-	HMDB0000626	83-44-3	-
Ile-Ile	Ile-Ile	Small Peptide	245.1	86.1	244.178693	Positive	[M+H]+	C12H24N2O3	0.826578	0.815904	N/A	0.2143794	0.2855532	0.753738	0.3836892	0.778638	N/A	0.2069772	1.857618	0.96663	2.962512	0.620826	1.331574	0.965526	0.774042	0.4318416	0.586494	0.5893164	-	-	42537-99-5	-
Isoursodeoxycholic-acid	Isoursodeoxycholic acid	Bile acids	375.29	357.27	392.29266	Positive	[M+H-H2O]+	C24H40O4	8.3961	10.04136	158.949	72.7314	50.0688	87.0198	N/A	13.09458	6.91554	45.27018	18.56196	N/A	45.71766	29.55816	14.56722	39.39402	72.3942	31.64676	30.84186	36.5676	-	HMDB0000686	78919-26-3	-
Protoporphyrin-IX	Protoporphyrin IX	Heterocyclic compounds	563.27	563.26	562.258006	Positive	[M+H]+	C34H34N4O4	4.781742	N/A	6.44976	N/A	3.736572	5.977644	4.618434	14.59152	11.6523	16.11018	16.71546	14.43858	3.864672	6.20088	10.09344	21.56454	31.61646	19.15158	19.23924	17.14734	-	HMDB0000241	553-12-8	-
L-alpha-Aspartyl-L-phenylalanine	L-alpha-Aspartyl-L-phenylalanine	Small Peptide	281.1	235	280.105923	Positive	[M+H]+	C13H16N2O5	9.56466	N/A	N/A	5.314602	8.50164	9.27642	17.49324	8.55144	11.27562	14.20842	9.47256	6.8517	6.70794	3.75072	6.17508	4.156062	2.895708	7.10988	7.7823	7.5303	-	HMDB0000706	13433-09-5	-
11-Dehydrocorticosterone	11-Dehydrocorticosterone	Hormones and hormone related compunds	345.3	121.1	344.19876	Positive	[M+H]+	C21H28O4	4.568058	4.11708	3.235212	5.88882	3.996294	2.033058	1.087734	1.323636	1.163088	N/A	1.717056	N/A	5.923914	4.584816	1.48845	3.851448	1.914672	2.711298	2.861616	2.570196	C05490	HMDB0004029	72-23-1	ko00140
Phe-Leu	Phe Leu	Small Peptide	279	120.1	278.163043	Positive	[M+H]+	C15H22N2O3	0.846444	0.91695	N/A	0.792792	0.7026	N/A	1.269768	1.948698	1.850808	1.560276	1.927062	1.234716	1.61055	1.440642	1.542816	1.23951	1.048566	1.26	1.61919	1.266006	-	-	3303-55-7	-
3-Hydroxyl-L-kynurenine	3-Hydroxyl-L-kynurenine	Amino acid derivatives	225.09	162.06	224.079708	Positive	[M+H]+	C10H12N2O4	12.10956	4.709514	11.84874	3.054342	5.519664	6.59682	4.964166	6.29676	7.67358	3.317334	1.90422	6.3753	N/A	6.07566	2.885868	N/A	5.274822	7.3305	6.1626	7.36452	-	HMDB0000732	484-78-6	-
Val-Val	Val-Val	Small Peptide	217.15467	72.081	216.147393	Positive	[M+H]+	C10H20N2O3	1.69542	0.8397	0.721866	0.746904	N/A	1.05813	0.95352	1.482828	N/A	1.50462	2.184354	1.667028	2.292216	1.41126	2.080974	1.560378	1.57668	1.460496	1.419162	1.287828	-	HMDB0029140	3918-94-3	-
(S)-beta-Aminoisobutyric-Acid	(S)-beta-Aminoisobutyric Acid	Amino acid derivatives	104.07	85.8	103.063329	Positive	[M+H]+	C4H9NO2	78.141	65.49	66.2952	70.7796	66.0786	62.652	67.0152	61.8714	66.7116	68.9784	48.65814	N/A	44.87682	41.60646	48.03456	N/A	66.0672	97.1058	73.9872	80.412	C03284	HMDB0002166	4249-19-8	ko00280,ko01100
Aceglutamide	Aceglutamide	Amino acid derivatives	189.1	130.1	188.079708	Positive	[M+H]+	C7H12N2O4	263.208	459.993	513.0714	442.7148	289.4298	226.9086	319.4868	404.2752	247.8126	408.366	170.2488	299.7636	222.2166	305.8026	N/A	N/A	504.2538	N/A	N/A	N/A	-	HMDB0006029	2490-97-3	-
Salicylic-acid	Salicylic acid	Benzene and substituted derivatives	137	93	138.031695	Negative	[M-H]-	C7H6O3	9.33168	12.2862	7.11774	N/A	8.4792	9.67428	12.51762	11.74566	9.72804	9.93096	6.62616	11.89326	7.56048	6.10038	N/A	7.76778	9.49878	9.20964	10.88592	9.48648	C00805	HMDB0001895	69-72-7	ko01100,ko04976
Isolithocholic-acid	Isolithocholic acid	Bile acids	375.3	375.3	376.297745	Negative	[M-H]-	C24H40O3	168.4758	171.9462	118.1202	173.5218	226.9944	144.5988	167.0844	224.2026	165.4008	152.5506	60.8364	130.9086	N/A	N/A	227.9958	117.4488	174.7014	116.0742	110.1552	101.2152	C17658	HMDB0000717	1534-35-6	-
L-NIO-hydrochloride	L-NIO-hydrochloride	Amino acid derivatives	174.1237	70.0656	173.116427	Positive	[M+H]+	C7H15N3O2	3.088554	6.04248	5.109924	4.801866	6.2925	1.506378	4.984728	4.394904	3.844032	2.75121	N/A	2.167902	N/A	N/A	1.25052	1.608522	4.707924	5.093172	3.901926	3.073824	-	-	36889-13-1	-
Suberic-acid	Suberic acid	Fatty Acyls	173.1	173.1	174.08921	Negative	[M-H]-	C8H14O4	N/A	201.1854	109.8606	70.6488	86.3394	65.0646	59.65392	85.3374	92.1234	75.8724	N/A	80.268	140.3562	N/A	70.2426	100.161	57.16128	62.3052	62.7744	55.22442	C08278	HMDB0000893	505-48-6	-
Phe-Val	Phe Val	Small Peptide	265.1	120	264.147393	Positive	[M+H]+	C14H20N2O3	0.376941	0.4293162	0.3957612	N/A	0.3832254	N/A	0.470139	0.549282	0.4917228	0.500307	0.791964	0.3953256	0.64218	N/A	0.5805474	0.490611	0.4733814	0.4932798	0.4959888	0.4896834	-	HMDB0029008	3918-90-9	-
Pro-Gln	Pro-Gln	Small Peptide	244.12918	70.0664	243.121907	Positive	[M+H]+	C10H17N3O4	2.628054	4.135962	N/A	N/A	1.866834	4.001832	2.242746	2.457612	3.294222	2.478144	1.800126	3.323682	7.05846	N/A	4.385004	2.170932	8.76252	10.5879	9.57738	8.06124	-	HMDB0029015	18668-08-1	-
gama-Glutamate-Cysteine	gama-Glutamate-Cysteine	Small Peptide	251.07	84.04	250.062343	Positive	[M+H]+	C8H14N2O5S	60.9408	33.37206	19.42926	28.974	27.83466	57.33	22.60734	20.22414	33.43488	46.0998	N/A	19.37994	N/A	13.33026	15.5298	N/A	39.66654	43.21254	44.01288	45.1632	-	HMDB0001049	636-58-8	-
Cysteic-acid	Cysteic acid	Amino acid derivatives	167.99722	80.9657	169.004494	Negative	[M-H]-	C3H7NO5S	65.0346	N/A	33.91026	N/A	36.26172	44.68302	35.89668	35.4786	N/A	69.5598	49.87014	34.5942	49.18848	32.42112	36.20502	33.4866	40.27398	48.67194	43.01556	43.76928	-	HMDB0002757	498-40-8	-
2-hydroxyphenylacetic-acid	2-hydroxyphenylacetic acid	Benzene and substituted derivatives	151.1	107.1	152.047345	Negative	[M-H]-	C8H8O3	7.13928	6.43128	2.942214	N/A	N/A	7.14318	5.626272	3.800628	4.470978	N/A	5.158512	6.11496	4.061466	7.27242	12.33576	5.279892	4.363188	3.523464	3.955794	3.626334	C05852	HMDB0000669	614-75-5	ko00360,ko01100
Deoxycorticosterone	Deoxycorticosterone	Hormones and hormone related compunds	331.3	97	330.219495	Positive	[M+H]+	C21H30O3	1.985886	0.764274	1.604544	1.877184	0.889386	0.4591872	0.57318	0.188292	1.30737	N/A	N/A	0.3384054	4.090836	8.83506	N/A	0.3423636	0.5187348	1.369878	1.272468	1.246434	C03205	HMDB0000016	64-85-7	ko00140,ko01100,ko04925
Hypoxanthine	Hypoxanthine	Nucleotide and Its metabolomics	137.04	110.2	136.038511	Positive	[M+H]+	C5H4N4O	N/A	45.88446	122.253	45.94944	N/A	40.9938	N/A	50.05086	N/A	57.57924	149.52	94.329	164.5818	128.6676	34.17474	76.1556	69.2016	N/A	N/A	N/A	C00262	HMDB0000157	68-94-0	ko00230,ko01100,ko01232
Phenylacetylglutamine	Phenylacetylglutamine	Amino acid derivatives	263.1	127.05	264.111008	Negative	[M-H]-	C13H16N2O4	N/A	2.110434	2.308656	2.770272	1.475454	N/A	N/A	1.498434	N/A	2.266266	2.987418	1.259298	2.19798	3.143892	2.101188	1.334826	4.321686	1.846506	1.617618	1.965768	C04148	HMDB0006344	28047-15-6	ko00360
1,3-diaminopropane	1,3-diaminopropane	Amines	75.0909	58.0649	74.08439833	Positive	[M+H]+	C3H10N2	N/A	64.965	N/A	N/A	63.2142	76.3722	65.7792	N/A	75.3786	87.8736	78.498	78.4476	76.5594	73.302	70.7544	68.4942	80.955	68.8518	66.5274	71.0592	C00986	HMDB0000002	109-76-2	ko00260,ko00330,ko00410,ko01100
17a-Estradiol	17a-Estradiol	Hormones and hormone related compunds	255.3	255.3	272.17763	Positive	[M+H-H2O]+	C18H24O2	4.35549	N/A	3.452694	10.59414	3.208512	2.52795	18.48498	1.892886	3.737976	4.890522	N/A	34.5648	N/A	17.38326	N/A	11.3421	10.3515	6.08676	8.44452	6.9162	C02537	HMDB0000429	57-91-0	ko00140
N-Heptanoylglycine	N-Heptanoylglycine	Amino acid derivatives	188.12812	76.0394	187.120844	Positive	[M+H]+	C9H17NO3	6.21732	N/A	12.1203	6.32298	6.60576	5.049066	1.94799	1.987164	2.243562	2.96652	N/A	5.360778	1.763244	4.982436	N/A	2.94276	N/A	3.944826	3.8331	3.786132	-	HMDB0013010	23783-23-5	-
Indole-3-glyoxylic-acid	Indole-3-glyoxylic acid	Indole and Its derivatives	190	144.1	189.042594	Positive	[M+H]+	C10H7NO3	N/A	6.93714	9.89184	3.910464	4.25934	6.79704	N/A	4.832436	6.11184	6.43032	11.71512	5.644152	8.4681	7.63176	N/A	N/A	8.61348	N/A	N/A	N/A	-	-	1477-49-2	-
L-Phenylalaninol	L-Phenylalaninol	Benzene and substituted derivatives	152.10699	117.0699	151.099714	Positive	[M+H]+	C9H13NO	3.316998	N/A	3.877788	3.203202	N/A	2.99529	4.147014	N/A	3.853602	2.722542	6.7734	4.597746	4.54158	5.079672	N/A	3.799956	3.462366	N/A	N/A	N/A	-	-	3182-95-4	-
omega-muricholic-acid	omega-muricholic acid	Bile acids	407.4	407.4	408.287575	Negative	[M-H]-	C24H40O5	56.03292	113.1906	N/A	577.0908	278.3922	346.005	N/A	N/A	N/A	400.1112	109.5498	416.3238	359.5368	148.3806	138.5694	592.3506	696.378	318.189	230.6886	308.325	C17727	HMDB0000364	6830-03-1	-
Val-Tyr	Val-Tyr	Small Peptide	281.14958	72.0811	280.142308	Positive	[M+H]+	C14H20N2O4	N/A	N/A	0.72231	N/A	N/A	0.486399	1.160352	1.520016	1.620102	4.057782	1.706622	1.441488	2.071266	1.666524	1.41777	1.07328	0.678372	1.0536	1.061544	1.505004	-	HMDB0029139	3061-91-4	-
1-methylpseudouridine	1-methylpseudouridine	Nucleotide and Its metabolomics	259.1	139	258.085188	Positive	[M+H]+	C10H14N2O6	13.49076	12.69726	15.31194	12.07698	9.9639	7.77162	6.41772	6.957	N/A	N/A	11.55666	N/A	11.11356	N/A	6.85596	9.26586	7.9545	11.43612	9.29202	9.47502	-	-	13860-38-3	-
Lauric-acid	Lauric acid	FFA	199.17	199.17	200.17763	Negative	[M-H]-	C12H24O2	49.82898	54.46764	184.3248	168.9348	81.4068	28.3302	N/A	61.4112	96.6504	159.279	124.815	N/A	107.1174	90.0648	N/A	168.3456	N/A	62.9736	60.21	76.9842	-	HMDB0000638	143-07-7	-
3-methyluridine	3-methyluridine	Nucleotide and Its metabolomics	259.1	127.1	258.085188	Positive	[M+H]+	C10H14N2O6	N/A	N/A	9.06138	N/A	6.46458	4.5822	4.99248	7.39074	4.29111	7.4496	11.14944	7.14168	N/A	8.58432	6.04026	7.14792	5.10069	N/A	N/A	N/A	-	HMDB0004813	2140-69-4	-
Val-Ala	Val-Ala	Small Peptide	189.12337	72.0807	188.116093	Positive	[M+H]+	C8H16N2O3	3.45225	N/A	3.429756	N/A	3.195864	4.36422	3.283362	N/A	N/A	N/A	4.329042	4.202136	5.43	2.937456	5.315742	5.904282	3.644604	3.798342	3.159624	3.253812	-	HMDB0029120	27493-61-4	-
N6,2'-O-dimethyladenosine	N6,2'-O-dimethyladenosine	Nucleotide and Its metabolomics	296.1	150.1	295.128055	Positive	[M+H]+	C12H17N5O4	0.261216	N/A	0.243735	N/A	0.2259498	0.2369952	0.2012064	0.186792	0.1781208	0.1873332	0.213408	0.1840608	0.1614186	0.1829838	N/A	N/A	N/A	N/A	N/A	N/A	-	-	57817-83-1	-
Phenoxyacetic-acid	Phenoxyacetic acid	Benzene and substituted derivatives	151.0395441	93.1	152.047345	Negative	[M-H]-	C8H8O3	0.836022	0.4949268	0.736212	0.4956678	N/A	0.3999774	0.5640264	N/A	N/A	0.5454702	0.433935	N/A	0.392085	0.5095104	0.467907	0.3825726	N/A	0.625452	0.5730636	0.4640964	C02181	HMDB0031609	122-59-8	-
Indoleacrylic-acid	Indoleacrylic acid	Indole and Its derivatives	186.06	142.07	187.063329	Negative	[M-H]-	C11H9NO2	1.1127	N/A	N/A	1.575624	1.758174	N/A	N/A	3.804066	2.020074	2.725986	5.188152	N/A	4.261422	6.42654	6.28026	4.962174	4.948026	2.162148	2.101368	2.437842	-	HMDB0000734	29953-71-7	-
Betaine-aldehyde-chloride	Betaine aldehyde chloride	Others	102	58.2	137.060742	Positive	[M]+	C5H12ClNO	5.0415	N/A	N/A	6.14484	8.10954	5.404326	5.348052	6.0018	6.67734	4.868532	4.705506	5.277594	N/A	N/A	7.11552	6.0615	N/A	N/A	N/A	N/A	-	-	7758-31-8	-
L-Tryptophyl-L-glutamic-acid	L-Tryptophyl-L-glutamic acid	Small Peptide	334.14	317.11	333.132472	Positive	[M+H]+	C16H19N3O5	N/A	0.2588784	0.99036	N/A	N/A	N/A	2.032104	2.103462	2.508144	1.941774	1.503186	N/A	1.619406	0.718848	1.686546	0.5128662	0.994476	1.369152	1.063848	1.344768	-	HMDB0029082	36099-95-3	-
Cyclohexylamine	Cyclohexylamine	Amines	99.9	83.1	99.104799	Positive	[M+H]+	C6H13N	0.88257	N/A	5.028942	2.392392	N/A	N/A	2.19879	N/A	N/A	0.1941072	6.03906	2.678526	6.05256	3.11484	2.923068	3.228996	N/A	N/A	N/A	N/A	C00571	HMDB0031404	108-91-8	-
DA	Decanoic Acid	FFA	308.19687	172.1703	307.393	Positive	[M+H]+	C16H25N3O3	61.8972	27.2742	64.7028	56.5722	83.3706	44.4174	21.9468	35.0646	40.482	N/A	N/A	N/A	N/A	44.1882	N/A	54.1386	N/A	43.37508	54.50682	50.9895	C01571	HMDB0000511	334-48-5	ko00061,ko01100
alpha-hexylcinnamaldehyde	alpha-hexylcinnamaldehyde	Benzene and substituted derivatives	217.1586301	129.0697	216.151415	Positive	[M+H]+	C15H20O	1890.168	N/A	N/A	2853.222	2565.336	2019.684	1679.004	N/A	N/A	1610.982	1412.526	2956.02	2125.176	N/A	N/A	1943.652	2781.798	3228.066	3511.992	2921.238	-	HMDB0031736	101-86-0	-
Ala-His	Ala-His	Small Peptide	227.11387	156.0774	226.106591	Positive	[M+H]+	C9H14N4O3	N/A	27.92406	26.7735	27.77376	N/A	27.76242	29.2395	31.2879	31.74636	27.52452	N/A	27.82266	N/A	N/A	30.61302	N/A	29.90052	N/A	N/A	N/A	-	HMDB0028689	3253-17-6	-
Indoleacetyl-glutamic-acid	Indoleacetyl glutamic acid	Amino acid derivatives	305.1132	130.0648	304.105923	Positive	[M+H]+	C15H16N2O5	N/A	N/A	0.5836842	0.5165646	0.4496418	0.1599126	0.3458736	0.3930978	0.3629136	N/A	N/A	0.3407856	0.944574	0.1864824	0.2099808	N/A	N/A	0.36198	0.3429432	0.4187862	-	HMDB0038665	57105-48-3	-
Ile-Trp	Ile-Trp	Small Peptide	318.18122	188.0715	317.173942	Positive	[M+H]+	C17H23N3O3	0.05867754	N/A	N/A	N/A	N/A	0.074781	0.328836	0.113568	0.2203506	0.3148428	0.05172414	N/A	0.0846816	0.021933	0.2062116	N/A	0.1360392	N/A	N/A	N/A	-	HMDB0028918	13589-06-5	-
2-methylsuccinic-acid	2-methylsuccinic acid	Organic acid And Its derivatives	131.03	87.05	132.04226	Negative	[M-H]-	C5H8O4	N/A	N/A	N/A	11.93898	6.56226	N/A	6.23568	8.5662	7.09278	4.761192	6.6597	4.476024	6.89964	8.48028	6.76194	N/A	N/A	N/A	N/A	N/A	-	HMDB0001844	498-21-5	-
Taurochenodeoxycholic-acid	Taurochenodeoxycholic acid	Bile acids	498.3	79.8	499.296759	Negative	[M-H]-	C26H45NO6S	22.88676	N/A	25.18656	N/A	N/A	67.0488	6.82362	4.741374	7.22712	N/A	13.0068	25.48308	N/A	13.74306	27.09174	25.27692	N/A	23.19156	21.01626	20.39436	C05465	HMDB0000951	516-35-8	ko00120,ko04976,ko04979
Hyodeoxycholic-acid	Hyodeoxycholic acid	Bile acids	391.3	391.3	392.29266	Negative	[M-H]-	C24H40O4	N/A	N/A	88.656	N/A	138.2028	92.1948	N/A	N/A	N/A	104.613	14.20692	323.6676	143.481	49.61424	N/A	73.1214	193.4748	83.541	86.5452	78.6192	C15517	HMDB0000733	83-49-8	-
dCMP	dCMP	Nucleotide and Its metabolomics	306	78.9	307.056939	Negative	[M-H]-	C9H14N3O7P	N/A	N/A	56.40366	50.29476	N/A	49.07826	49.67376	49.35192	N/A	53.90238	49.36254	53.48142	N/A	N/A	51.45858	N/A	51.63558	N/A	N/A	N/A	C00239	HMDB0001202	1032-65-1	ko00240,ko01100,ko01232
Indole-3-pyruvic-acid	Indole-3-pyruvic acid	Indole and Its derivatives	202	143.2	203.058244	Negative	[M-H]-	C11H9NO3	11.69664	8.20728	N/A	N/A	16.98708	N/A	18.18426	16.14126	11.15484	N/A	13.23594	11.4126	12.0342	10.08708	N/A	N/A	N/A	11.1393	11.30166	10.24284	C00331	HMDB0060484	392-12-1	ko00380,ko01100
N-Acetylproline	N-Acetylproline	Amino acid derivatives	158.08	70.07	157.073894	Positive	[M+H]+	C7H11NO3	N/A	3.187602	1.405056	N/A	N/A	1.973124	2.935584	6.03618	N/A	1.958562	N/A	N/A	2.195532	0.83202	N/A	1.878414	3.645936	N/A	N/A	N/A	-	HMDB0094701	68-95-1	-
Enterodiol	Enterodiol	Benzene and substituted derivatives	301.1440092	253	302.15181	Negative	[M-H]-	C18H22O4	0.361422	0.236751	0.31347	0.2118528	0.1258494	N/A	N/A	N/A	N/A	N/A	N/A	0.1108224	0.1094556	0.069324	N/A	0.3622206	0.01422012	N/A	N/A	N/A	C18166	HMDB0005056	80226-00-2	-
N-formylkynurenine	N-formylkynurenine	Organic acid And Its derivatives	237.1	192.1	236.079708	Positive	[M+H]+	C11H12N2O4	N/A	2.111244	N/A	6.22536	0.2669682	0.999654	3.331182	N/A	N/A	N/A	11.05656	N/A	89.4276	N/A	0.5929098	5.20902	5.438592	N/A	N/A	N/A	-	HMDB0001200	1022-31-7	-
Val-Ile	Val-Ile	Small Peptide	231.17032	72.0813	230.163043	Positive	[M+H]+	C11H22N2O3	N/A	N/A	N/A	0.4011888	N/A	0.786024	N/A	N/A	N/A	0.77979	1.008864	0.709176	1.136142	0.714432	1.214892	0.891294	0.826476	0.650118	0.736614	0.642936	-	HMDB0029130	20556-14-3	-
Cis-13,16,19-docosatrienoic-acid	Cis-13,16,19-docosatrienoic acid	FFA	333.28	333.28	334.28718	Negative	[M-H]-	C22H38O2	N/A	N/A	N/A	N/A	N/A	N/A	112.2762	120.99	100.2012	N/A	95.1276	79.5408	92.0718	83.4576	103.0956	127.1352	N/A	N/A	N/A	N/A	-	HMDB0002823	28845-86-5	-
7-Ketodeoxycholic-acid	7-Ketodeoxycholic acid	Bile acids	405.3	405.3	406.271925	Negative	[M-H]-	C24H38O5	1.77153	1.301178	58.51356	47.7492	14.05248	50.63004	N/A	N/A	N/A	10.82058	N/A	9.18552	N/A	N/A	N/A	N/A	30.63378	14.21508	13.79922	12.6132	-	HMDB0000391	911-40-0	-
Ala-Ala	Ala-Ala	Small Peptide	161.09207	44.0498	160.084793	Positive	[M+H]+	C6H12N2O3	N/A	N/A	22.41396	23.31066	17.17236	19.3197	17.79762	25.52868	18.81828	N/A	N/A	N/A	23.46996	N/A	N/A	N/A	32.72958	23.25972	19.01916	19.53582	-	HMDB0003459	1948-31-8	-
3-oxodeoxycholic-acid	3-oxodeoxycholic acid	Bile acids	389.3	345.3	390.27701	Negative	[M-H]-	C24H38O4	N/A	N/A	N/A	2.839536	1.73778	1.863966	N/A	N/A	N/A	1.015224	N/A	2.112918	5.395182	1.774614	N/A	1.745226	1.35204	N/A	N/A	N/A	-	HMDB0062742	4185-01-7	-
Benzenepropanoic-acid	Benzenepropanoic acid	Organic acid And Its derivatives	149.06	149.06	150.06808	Negative	[M-H]-	C9H10O2	N/A	N/A	N/A	N/A	N/A	286.0614	199.4622	220.8348	N/A	417.8874	N/A	250.1628	267.8346	N/A	200.322	188.607	N/A	250.8204	247.2474	197.9088	-	HMDB0000764	501-52-0	-
2'-O-methyluridine	2'-O-methyluridine	Nucleotide and Its metabolomics	257.07	214	258.085188	Negative	[M-H]-	C10H14N2O6	N/A	N/A	13.94136	N/A	N/A	14.93004	N/A	N/A	N/A	N/A	22.22268	18.87726	16.59774	N/A	11.0427	13.54188	18.55788	N/A	N/A	N/A	-	HMDB0240328	2140-76-3	-
L-Tyrosine-ethyl-ester	L-Tyrosine ethyl ester	Amino acid derivatives	210.11247	136.0761	209.105194	Positive	[M+H]+	C11H15NO3	N/A	17.66346	24.84588	N/A	N/A	N/A	N/A	N/A	N/A	21.40986	26.26176	19.88244	25.81218	24.54948	N/A	20.59272	N/A	N/A	N/A	N/A	-	-	949-67-7	-
2-Hydroxypyridine	2-Hydroxypyridine	Pyridines and derivatives	96.04	78.03	95.037114	Positive	[M+H]+	C5H5NO	8.64132	N/A	9.61626	N/A	N/A	12.62208	N/A	N/A	3.96321	N/A	11.06418	N/A	15.82212	5.62365	7.32726	N/A	N/A	9.79518	8.63562	8.69316	-	HMDB0013751	142-08-5	-
Androstanedione	Androstanedione	Hormones and hormone related compunds	289.20893	253.5	288.20893	Positive	[M+H]+	C19H28O2	7.58058	5.085444	N/A	6.819	N/A	N/A	N/A	8.37954	4.928598	N/A	40.54158	5.36211	N/A	N/A	N/A	8.41728	N/A	8.24112	6.50082	5.708574	C00674	HMDB0000899	846-46-8	ko00140,ko01100
Val-Gly	Val-Gly	Small Peptide	175.10772	72.0805	174.100443	Positive	[M+H]+	C7H14N2O3	36.8331	30.76404	46.01172	20.23158	N/A	17.23146	N/A	16.5801	N/A	N/A	N/A	25.30866	N/A	N/A	N/A	21.50484	N/A	21.80016	20.60406	23.44596	-	HMDB0029127	686-43-1	-
Xanthosine	Xanthosine	Nucleotide and Its metabolomics	283	150.9	284.075686	Positive	[M-H]-	C10H12N4O6	14.7048	N/A	17.53422	54.69198	14.26632	17.23386	N/A	N/A	N/A	N/A	14.85444	N/A	16.7847	11.20956	N/A	N/A	N/A	N/A	N/A	N/A	C01762	HMDB0000299	146-80-5	ko00230,ko00232,ko01100,ko01232,ko02010
N-Isovaleroylglycine	N-Isovaleroylglycine	Amino acid derivatives	158.1	74	159.089544	Negative	[M-H]-	C7H13NO3	26.81556	N/A	11.72352	16.61406	N/A	15.32898	N/A	N/A	N/A	N/A	N/A	16.62636	2.083434	14.11728	N/A	N/A	5.456958	8.08296	5.706528	7.30584	-	HMDB0000678	16284-60-9	-
Glycocholic-acid	Glycocholic acid	Bile acids	464.3	74.02	465.309039	Negative	[M-H]-	C26H43NO6	N/A	N/A	1.521942	4.188942	2.804826	5.925552	N/A	N/A	N/A	N/A	N/A	1.310502	0.3123264	1.215762	N/A	N/A	0.760452	N/A	N/A	N/A	C01921	HMDB0000138	475-31-0	ko00120,ko01100,ko04976,ko04979
Vitamin-B9	Vitamin B9	CoEnzyme and vitamins	442.2	295.1	441.139683	Positive	[M+H]+	C19H19N7O6	N/A	N/A	8.4912	N/A	N/A	N/A	8.48172	N/A	N/A	7.59492	7.57176	9.21468	7.54326	7.5501	N/A	N/A	8.2131	N/A	N/A	N/A	C00504	HMDB0000121	59-30-3	ko00670,ko00790,ko01100,ko01240,ko01523,ko04976,ko04977
Bradykinin	Bradykinin	Small Peptide	904.5	904.5	903.460289	Positive	[M+H]+	C44H61N11O10	N/A	334.9182	339.9426	330.2748	335.0796	343.584	N/A	N/A	N/A	N/A	N/A	N/A	N/A	346.4232	N/A	319.7238	341.7336	N/A	N/A	N/A	-	-	15958-92-6	-
Phenylethylamine	Phenylethylamine	Benzene and substituted derivatives	122.096974	105.1	121.089149	Positive	[M+H]+	C8H11N	N/A	0.3115128	0.5679762	N/A	N/A	N/A	0.4777356	1.122738	N/A	0.65202	0.787542	0.4141692	0.507936	N/A	N/A	N/A	N/A	N/A	N/A	N/A	C05332	HMDB0012275	64-04-0	ko00360,ko01100
Progesterone	Progesterone	Hormones and hormone related compunds	315.2245802	97.1	314.22458	Positive	[M+H]+	C21H30O2	0.2980884	N/A	0.2916006	0.2443998	N/A	0.1395792	0.1673262	N/A	0.2663622	N/A	N/A	N/A	0.4460034	0.957336	N/A	N/A	N/A	0.1894086	0.2048526	0.2100282	C00410	HMDB0001830	57-83-0	ko00140,ko01100,ko04080,ko04114,ko04913,ko04914,ko04917,ko04925,ko04927,ko04934,ko05200,ko05207,ko05215,ko05224
Cyclamic-acid	Cyclamic acid	Organic acid And Its derivatives	178.0538143	80	179.061614	Negative	[M-H]-	C6H13NO3S	N/A	0.3061578	0.05279622	0.1686936	N/A	0.955476	N/A	0.1798128	N/A	0.324444	N/A	N/A	N/A	N/A	1.182006	N/A	0.3975822	N/A	N/A	N/A	C02824	HMDB0031340	100-88-9	-
Cinnabarinic-acid	Cinnabarinic acid	Benzene and substituted derivatives	298.9	211.2	300.038238	Negative	[M-H]-	C14H8N2O6	5.053548	4.794006	N/A	5.889372	N/A	N/A	N/A	4.32954	N/A	7.06644	7.39512	N/A	N/A	N/A	N/A	7.43826	N/A	N/A	N/A	N/A	-	HMDB0004078	606-59-7	-
cyclo(leu-phe)	cyclo(leu-phe)	Small Peptide	261.15975	120.081	260.152478	Positive	[M+H]+	C15H20N2O2	N/A	N/A	N/A	N/A	N/A	0.05372526	N/A	N/A	N/A	2.088864	N/A	0.950742	0.2161362	1.118808	N/A	0.255282	2.49426	0.2186364	0.2448144	0.3199398	-	HMDB0094673	7280-77-5	-
L-Gulonolactone	L-Gulonolactone	Sugar acids	177.039938	59	178.04774	Negative	[M-H]-	C6H10O6	129.072	80.526	136.8474	99.1512	127.0596	64.2084	N/A	N/A	N/A	N/A	N/A	75.324	N/A	N/A	N/A	N/A	N/A	66.0618	63.15	88.3986	C01040	HMDB0003466	1128-23-0	ko00053,ko01100,ko01240
2-Hydroxyhippuric-acid	2-Hydroxyhippuric acid	Benzene and substituted derivatives	194.05	93.04	195.053159	Negative	[M-H]-	C9H9NO4	N/A	0.2995812	0.2253006	N/A	N/A	N/A	0.3159468	0.256323	0.1824828	N/A	N/A	N/A	0.775182	0.797964	N/A	N/A	N/A	N/A	N/A	N/A	-	HMDB0000840	487-54-7	-
3-hydroxymethylglutaric-acid	3-hydroxymethylglutaric acid	Amino acid derivatives	161.2	99	162.052825	Negative	[M-H]-	C6H10O5	N/A	100.356	228.1848	156.9912	N/A	92.9022	101.232	83.2548	N/A	N/A	N/A	136.8834	N/A	N/A	N/A	N/A	N/A	N/A	N/A	N/A	C03761	HMDB0000355	503-49-1	-
4-Acetamidobutyric-Acid	4-Acetamidobutyric Acid	Amino acid derivatives	146.074	86	145.073894	Positive	[M+H]+	C6H11NO3	41.38842	48.08346	59.4525	44.21364	N/A	N/A	34.96422	N/A	N/A	N/A	N/A	N/A	N/A	40.158	N/A	N/A	41.27652	N/A	N/A	N/A	C02946	HMDB0003681	3025-96-5	ko00330,ko01100
5beta-Androsterone	5beta-Androsterone	Hormones and hormone related compunds	273.22458	273.22458	290.22458	Positive	[M+H-H2O]+	C19H30O2	N/A	29.73654	24.28698	31.4676	32.95704	N/A	N/A	33.06888	N/A	N/A	N/A	N/A	N/A	N/A	N/A	26.24526	N/A	27.01332	28.2258	31.704	C04373	HMDB0000490	53-42-9	ko00140
Gly-Trp	Gly-Trp	Small Peptide	262.1094522	188.0706	261.111342	Positive	[M+H]+	C13H15N3O3	0.220521	N/A	N/A	0.1105122	N/A	0.1587366	N/A	N/A	N/A	0.2162844	N/A	N/A	N/A	N/A	N/A	0.3084054	0.1316202	0.3288744	0.4206654	0.4212126	-	-	2390-74-1	-
D-Erythrose-4-phosphate	D-Erythrose 4-phosphate	Phosphate sugars	199.1	96.8	200.008592	Negative	[M-H]-	C4H9O7P	N/A	N/A	N/A	N/A	N/A	43.55814	N/A	N/A	N/A	48.62784	51.24648	47.35944	48.10224	47.83338	N/A	N/A	N/A	57.52266	46.71594	45.42492	C00279	HMDB0001321	585-18-2	ko00030,ko00400,ko00750,ko01100,ko01200,ko01230,ko01240
Suberylglycine	Suberylglycine	Amino acid derivatives	232.11795	157.0864	231.110674	Positive	[M+H]+	C10H17NO5	7.91088	N/A	8.99934	6.61308	5.46777	3.978054	N/A	N/A	N/A	N/A	N/A	N/A	N/A	4.068276	N/A	N/A	N/A	4.031862	4.80102	4.943484	-	HMDB0000953	60317-54-6	-
isoCDCA	Isochenodeoxycholic Acid	Bile acids	391.28538	391.28	392.29266	Negative	[M-H]-	C24H40O4	N/A	N/A	N/A	14.40606	11.73498	6.23268	N/A	N/A	N/A	N/A	N/A	N/A	5.237592	14.6346	N/A	N/A	N/A	N/A	N/A	N/A	-	HMDB0000361	566-24-5	-
Cytosine	Cytosine	Nucleotide and Its metabolomics	110.036	67.1	111.043262	Negative	[M-H]-	C4H5N3O	N/A	N/A	129.42	N/A	N/A	62.3586	N/A	N/A	N/A	N/A	N/A	N/A	214.3536	N/A	48.85008	44.49312	N/A	N/A	N/A	N/A	C00380	HMDB0000630	71-30-7	ko00240,ko01100,ko01232
Guanosine	Guanosine	Nucleotide and Its metabolomics	282	150	283.09167	Negative	[M-H]-	C10H13N5O5	N/A	N/A	N/A	N/A	N/A	N/A	N/A	2.872956	N/A	3.875154	3.843798	N/A	N/A	N/A	1.91259	3.290514	N/A	N/A	N/A	N/A	C00387	HMDB0000133	118-00-3	ko00230,ko01100,ko01232,ko02010
Indolyl-3-aspartic-acid	Indolyl-3-aspartic acid	Amino acid derivatives	291.09755	130.0653	290.090273	Positive	[M+H]+	C14H14N2O5	N/A	0.5090856	N/A	N/A	N/A	N/A	0.01865388	2.387448	2.357334	N/A	N/A	N/A	2.437056	N/A	N/A	N/A	N/A	N/A	N/A	N/A	-	HMDB0038666	2456-73-7	-
16alpha-Hydroxy-Estrone	16alpha-Hydroxy Estrone	Hormones and hormone related compunds	287.37	133	286.156895	Positive	[M+H]+	C18H22O3	5.780784	N/A	N/A	N/A	N/A	6.99102	N/A	N/A	N/A	6.68346	N/A	6.10266	7.53684	N/A	N/A	N/A	N/A	N/A	N/A	N/A	C05300	HMDB0000335	566-76-7	ko00140,ko01100
Dephosphocoenzyme-A-(Dephospho-CoA)	Dephosphocoenzyme A (Dephospho-CoA)	CoEnzyme and vitamins	688.16	261.13	687.148882	Positive	[M+H]+	C21H35N7O13P2S	N/A	1296.504	N/A	N/A	N/A	1300.56	N/A	N/A	N/A	N/A	N/A	N/A	1296.558	N/A	1300.92	1303.416	N/A	N/A	N/A	N/A	-	HMDB0001373	3633-59-8	-
L-Homophenylalanine	L-Homophenylalanine	Amino acid derivatives	180.1	91.05	179.094629	Positive	[M+H]+	C10H13NO2	N/A	N/A	N/A	N/A	N/A	0.68334	N/A	N/A	N/A	N/A	0.918786	N/A	N/A	0.5856336	N/A	0.4160154	0.4602558	N/A	N/A	N/A	C17235	-	943-73-7	ko00400,ko01100,ko01210
Androstenedione	Androstenedione	Hormones and hormone related compunds	287.19328	97	286.19328	Positive	[M+H]+	C19H26O2	N/A	N/A	N/A	N/A	0.4298208	N/A	0.472224	N/A	0.5584872	0.4276728	N/A	N/A	N/A	N/A	0.3767166	N/A	N/A	N/A	N/A	N/A	C00280	HMDB0000053	63-05-8	ko00140,ko01100,ko01522,ko04913,ko04917,ko05200,ko05215
O-Acetyl-L-homoserine	O-Acetyl-L-homoserine	Amino acid derivatives	162.07608	102.055	161.068809	Positive	[M+H]+	C6H11NO4	93.864	N/A	86.7462	N/A	66.3138	74.3166	N/A	N/A	72.3078	N/A	N/A	N/A	N/A	N/A	N/A	N/A	N/A	62.1798	64.7412	60.1326	-	HMDB0029423	250736-84-6	-
Serotonin	Serotonin	Indole and Its derivatives	177.1	105.2	176.094963	Positive	[M+H]+	C10H12N2O	N/A	N/A	271.4712	N/A	N/A	N/A	N/A	N/A	470.3802	N/A	361.8486	N/A	N/A	196.7148	N/A	255.84	N/A	N/A	N/A	N/A	C00780	HMDB0000259	153-98-0(50-67-9)	ko00380,ko01100,ko04024,ko04080,ko04540,ko04721,ko04726,ko04742,ko04750,ko04976,ko05207
3-beta-deoxycholic-acid	3-beta-deoxycholic acid	Bile acids	391.3	391.3	392.29266	Negative	[M-H]-	C24H40O4	N/A	N/A	N/A	37.21536	26.81748	18.918	N/A	N/A	N/A	N/A	N/A	N/A	N/A	27.68022	N/A	N/A	N/A	N/A	N/A	N/A	-	HMDB0000438	570-63-8	-
L-Homocystine	L-Homocystine	Amino acids	269	136	268.055148	Positive	[M+H]+	C8H16N2O4S2	N/A	N/A	N/A	316.9638	N/A	N/A	N/A	N/A	N/A	320.1852	320.1156	318.3972	N/A	N/A	N/A	N/A	N/A	N/A	N/A	N/A	C01817	HMDB0000676	626-72-2	ko00270
5-Hydroxylysine	5-Hydroxylysine	Amino acid derivatives	163.1	128.07	162.100443	Positive	[M+H]+	C6H14N2O3	13.87578	N/A	18.0525	N/A	13.74288	N/A	N/A	N/A	N/A	N/A	N/A	16.05906	N/A	N/A	N/A	N/A	N/A	N/A	N/A	N/A	C16741	HMDB0000450	13204-98-3(1190-94-9)	ko00310,ko01100
Ser-Glu	Ser-Glu	Small Peptide	235.09246	148.0605	234.085188	Positive	[M+H]+	C8H14N2O6	N/A	N/A	N/A	N/A	N/A	N/A	30.60042	N/A	N/A	N/A	31.34724	26.20974	N/A	N/A	28.60062	N/A	N/A	28.54386	26.9874	29.48058	-	HMDB0029038	6403-16-3	-
Nor-Deoxycholic-Acid	Nor-Deoxycholic Acid	Bile acids	377.3	377.3	378.27701	Negative	[M-H]-	C23H38O4	N/A	N/A	6.46818	8.67504	7.00404	N/A	N/A	N/A	N/A	N/A	N/A	N/A	7.38852	N/A	N/A	N/A	N/A	N/A	N/A	N/A	-	-	53608-86-9	-
Myristoleic-acid	Myristoleic acid	FFA	227.2	69	226.19328	Positive	[M+H]+	C14H26O2	N/A	N/A	1844.466	N/A	N/A	N/A	N/A	N/A	N/A	N/A	N/A	N/A	664.614	1416.33	N/A	696.918	N/A	412.8804	344.7888	388.0884	-	HMDB0002000	544-64-9	-
7a,27-Dihydroxycholesterol	7a,27-Dihydroxycholesterol	Hormones and hormone related compunds	401.3	383.3	418.344695	Positive	[M+H-H2O]+	C27H46O3	12.37752	N/A	N/A	20.66442	18.95238	N/A	N/A	N/A	N/A	N/A	N/A	N/A	N/A	13.30374	N/A	N/A	N/A	N/A	N/A	N/A	C06341	HMDB0006281	4725-24-0	ko00120
Ile-Leu	Ile-Leu	Small Peptide	245.18597	69.0702	244.178693	Positive	[M+H]+	C12H24N2O3	N/A	N/A	N/A	N/A	N/A	5.953404	N/A	N/A	5.368026	N/A	4.892694	N/A	N/A	N/A	6.32448	N/A	N/A	N/A	N/A	N/A	-	HMDB0028911	26462-22-6	-
Inosine	Inosine	Nucleotide and Its metabolomics	267	135	268.080771	Negative	[M-H]-	C10H12N4O5	N/A	N/A	N/A	1.224036	N/A	N/A	N/A	0.835356	N/A	1.886412	N/A	N/A	1.722072	N/A	N/A	N/A	N/A	N/A	N/A	N/A	C00294	HMDB0000195	58-63-9	ko00230,ko01100,ko01232,ko02010
2-Piperidone	2-Piperidone	Heterocyclic compounds	100.1	56	99.068414	Positive	[M+H]+	C5H9NO	11.09442	N/A	23.40726	1.661448	4.772982	N/A	N/A	N/A	N/A	N/A	N/A	N/A	N/A	N/A	N/A	N/A	N/A	N/A	N/A	N/A	-	HMDB0011749	675-20-7	-
Sucrose	Sucrose	Sugars	341.10894	59.014	342.116215	Negative	[M-H]-	C12H22O11	N/A	1355.856	N/A	N/A	N/A	N/A	N/A	N/A	N/A	N/A	931.452	N/A	N/A	N/A	1053.216	N/A	N/A	N/A	N/A	N/A	-	HMDB0000258	57-50-1	-
Homovanillic-Acid	Homovanillic Acid	Phenols	181.050085	122.1	182.05791	Negative	[M-H]-	C9H10O4	N/A	N/A	N/A	6.47148	N/A	N/A	N/A	N/A	15.31752	N/A	8.42424	N/A	N/A	N/A	N/A	N/A	N/A	N/A	N/A	N/A	C05582	HMDB0000118	306-08-1	ko00350,ko01100,ko04728
dAMP	dAMP	Nucleotide and Its metabolomics	332.08	136.06	331.068172	Positive	[M+H]+	C10H14N5O6P	N/A	N/A	7.61604	N/A	N/A	N/A	N/A	N/A	N/A	N/A	3.161424	N/A	0.1152672	N/A	N/A	N/A	N/A	N/A	N/A	N/A	-	HMDB0000905	653-63-4	-
Glutaconic-acid	Glutaconic acid	Organic acid And Its derivatives	129	85.1	130.02661	Negative	[M-H]-	C5H6O4	N/A	N/A	N/A	N/A	N/A	N/A	12.62124	N/A	N/A	N/A	34.41672	N/A	23.17926	N/A	N/A	N/A	N/A	N/A	N/A	N/A	C02214	HMDB0000620	1724-02-3	-
Trp-Gly	Trp-Gly	Small Peptide	262.11862	159.0908	261.111342	Positive	[M+H]+	C13H15N3O3	N/A	N/A	N/A	N/A	N/A	2.884206	N/A	2.772672	N/A	N/A	2.928144	N/A	N/A	N/A	N/A	N/A	N/A	N/A	N/A	N/A	-	HMDB0029083	7360-09-0	-
Tyr-Glu	Tyr-Glu	Small Peptide	311.12376	136.0752	310.116488	Positive	[M+H]+	C14H18N2O6	N/A	N/A	N/A	N/A	N/A	N/A	N/A	N/A	82.9512	401.1126	456.5286	N/A	N/A	N/A	N/A	N/A	N/A	N/A	N/A	N/A	-	HMDB0029104	2545-89-3	-
Caffeine	Caffeine	Imidazopyrimidines	195.09	138.07	194.080376	Positive	[M+H]+	C8H10N4O2	N/A	N/A	N/A	0.04128744	N/A	N/A	N/A	0.2925078	N/A	N/A	N/A	N/A	0.03511902	N/A	N/A	N/A	N/A	N/A	N/A	N/A	C07481	HMDB0001847	58-08-2	ko00232,ko01100
AA	Acetic Acid	SCFA	196.07167	137.04	195.06439	Positive	[M+H]+	C8H9N3O3	N/A	N/A	12989.58	7131.54	7807.5	N/A	N/A	N/A	N/A	N/A	N/A	N/A	N/A	N/A	N/A	N/A	N/A	N/A	N/A	N/A	C00033	HMDB0000042	64-19-7	ko00010,ko00430,ko00440,ko00534,ko00620,ko00630,ko00920,ko01100,ko01200,ko04725,ko04936,ko04973,ko04974
Glycodeoxycholic-acid	Glycodeoxycholic acid	Bile acids	448.3	73.8	449.314124	Negative	[M-H]-	C26H43NO5	N/A	N/A	N/A	0.0732858	0.02125842	0.02153016	N/A	N/A	N/A	N/A	N/A	N/A	N/A	N/A	N/A	N/A	N/A	N/A	N/A	N/A	C05464	HMDB0000631	360-65-6(16409-34-0)	-
Norcholic-acid	Norcholic acid	Bile acids	393.3	393.3	394.271925	Negative	[M-H]-	C23H38O5	N/A	N/A	N/A	2.628438	N/A	N/A	N/A	N/A	N/A	N/A	N/A	N/A	N/A	7.96914	N/A	N/A	N/A	N/A	N/A	N/A	-	-	60696-62-0	-
Ala-Glu	Ala-Glu	Small Peptide	219.09755	148.0607	218.090273	Positive	[M+H]+	C8H14N2O5	N/A	N/A	N/A	N/A	N/A	N/A	5.19663	N/A	N/A	N/A	N/A	N/A	N/A	N/A	3.544104	N/A	N/A	N/A	N/A	N/A	-	HMDB0028686	13187-90-1	-
Glycylphenylalanine	Glycylphenylalanine	Small Peptide	223.2	120.2	222.100443	Positive	[M+H]+	C11H14N2O3	1.0353	N/A	N/A	N/A	N/A	1.016508	N/A	N/A	N/A	N/A	N/A	N/A	N/A	N/A	N/A	N/A	N/A	0.721428	0.968832	1.135212	-	HMDB0028848	3321-03-7	-
3,3',5-Triiodo-L-Thyronine	3,3',5-Triiodo-L-Thyronine	Hormones and hormone related compunds	649.7822729	632.7	650.790074	Negative	[M-H]-	C15H12I3NO4	N/A	N/A	N/A	N/A	N/A	N/A	N/A	1.377402	N/A	N/A	N/A	1.367814	N/A	N/A	N/A	N/A	N/A	N/A	N/A	N/A	C02465	HMDB0000265	6893-02-3	ko00350,ko01100,ko04080,ko04714,ko04918,ko04919,ko04976,ko05320
Fumaric-acid	Fumaric acid	Organic acid And Its derivatives	114.9	70.9	116.01096	Negative	[M-H]-	C4H4O4	N/A	N/A	N/A	463.089	N/A	N/A	N/A	N/A	396.1068	N/A	N/A	N/A	N/A	N/A	N/A	N/A	N/A	N/A	N/A	N/A	C00122	HMDB0000134	110-17-8	ko00020,ko00190,ko00220,ko00250,ko00350,ko00360,ko00620,ko00650,ko00760,ko01100,ko01200,ko04922,ko05200,ko05211,ko05230
Tyr-Phe	Tyr-Phe	Small Peptide	329.14958	119.049	328.142308	Positive	[M+H]+	C18H20N2O4	N/A	N/A	N/A	N/A	N/A	N/A	N/A	N/A	N/A	N/A	N/A	N/A	0.3413634	N/A	0.5061	N/A	N/A	N/A	N/A	N/A	-	HMDB0029112	17355-11-2	-
Cortisone	Cortisone	Hormones and hormone related compunds	361.2	163	360.193675	Positive	[M+H]+	C21H28O5	N/A	N/A	N/A	N/A	N/A	0.3790134	N/A	N/A	N/A	N/A	N/A	N/A	N/A	N/A	N/A	0.862398	N/A	N/A	N/A	N/A	C00762	HMDB0002802	53-06-5	ko00140,ko01100,ko04960,ko05200,ko05215
4-Methyl-2-oxovaleric-acid	4-Methyl-2-oxovaleric acid	Organic acid And Its derivatives	129.06	129.05	130.062995	Negative	[M-H]-	C6H10O3	N/A	N/A	4634.118	N/A	N/A	3267.51	N/A	N/A	N/A	N/A	N/A	N/A	N/A	N/A	N/A	N/A	N/A	N/A	N/A	N/A	-	HMDB0000695	816-66-0	-
1-Methyladenine	1-Methyladenine	Nucleotide and Its metabolomics	148.0623452	107	149.070145	Negative	[M-H]-	C6H7N5	N/A	N/A	N/A	N/A	N/A	N/A	N/A	0.541005	N/A	N/A	N/A	N/A	0.85335	N/A	N/A	N/A	N/A	N/A	N/A	N/A	C02216	HMDB0011599	5142-22-3	-
2-thiocytidine	2-thiocytidine	Nucleotide and Its metabolomics	260.1	128	259.062677	Positive	[M+H]+	C9H13N3O4S	N/A	N/A	N/A	N/A	N/A	N/A	N/A	N/A	N/A	N/A	N/A	N/A	N/A	N/A	N/A	N/A	2.675172	N/A	N/A	N/A	-	-	13239-97-9	-
Quinoline	Quinoline	Quinolines and derivatives	130.07	77	129.057849	Positive	[M+H]+	C9H7N	N/A	N/A	N/A	N/A	N/A	N/A	N/A	N/A	N/A	29.6451	N/A	N/A	N/A	N/A	N/A	N/A	N/A	N/A	N/A	N/A	-	HMDB0033731	91-22-5	-
CA	Caproic Acid	SCFA	252.13427	116.1065	251.12699	Positive	[M+H]+	C12H17N3O3	N/A	N/A	N/A	N/A	132.012	N/A	N/A	N/A	N/A	N/A	N/A	N/A	N/A	N/A	N/A	N/A	N/A	N/A	N/A	N/A	C01585	HMDB0000535	142-62-1	-
Benzoic-acid	Benzoic acid	Benzene and substituted derivatives	121.03	77.04	122.03678	Negative	[M-H]-	C7H6O2	N/A	N/A	N/A	N/A	2454.084	N/A	N/A	N/A	N/A	N/A	N/A	N/A	N/A	N/A	N/A	N/A	N/A	N/A	N/A	N/A	C00180	HMDB0001870	65-85-0	ko01100
3-Hydroxytyramine	3-Hydroxytyramine	Amines	154.086804	137.2	153.078979	Positive	[M+H]+	C8H11NO2	N/A	N/A	N/A	N/A	N/A	N/A	N/A	N/A	N/A	N/A	365.7186	N/A	N/A	N/A	N/A	N/A	N/A	N/A	N/A	N/A	C03758	HMDB0000073	51-61-6	ko00350,ko01100,ko04024,ko04080,ko04540,ko04721,ko04728,ko04917,ko04976,ko05012,ko05030,ko05031,ko05032,ko05034
Quinolinic-Acid	Quinolinic Acid	Pyridines and derivatives	166.014034	78	167.021859	Negative	[M-H]-	C7H5NO4	N/A	N/A	N/A	N/A	N/A	N/A	27.4302	N/A	N/A	N/A	N/A	N/A	N/A	N/A	N/A	N/A	N/A	N/A	N/A	N/A	C03722	HMDB0000232	89-00-9	ko00380,ko00410,ko00760,ko01100,ko01240
Tiglylcarnitine-Hydrochloride	Tiglylcarnitine Hydrochloride	CAR	244.15433	185.08	243.147059	Positive	[M+H]+	C12H21NO4	N/A	N/A	N/A	N/A	N/A	N/A	N/A	N/A	N/A	N/A	N/A	N/A	N/A	N/A	N/A	N/A	0.577311	N/A	N/A	N/A	-	HMDB0002366	64681-36-3	-
Gly-Tyr	Gly-Tyr	Small Peptide	239.10263	136.0763	238.095358	Positive	[M+H]+	C11H14N2O4	N/A	N/A	N/A	N/A	N/A	N/A	N/A	N/A	N/A	1.34958	N/A	N/A	N/A	N/A	N/A	N/A	N/A	N/A	N/A	N/A	-	HMDB0028853	658-79-7	-
Met-Met	Met-Met	Small Peptide	281.09881	104.0532	280.091533	Positive	[M+H]+	C10H20N2O3S2	N/A	N/A	N/A	N/A	0.1883304	N/A	N/A	N/A	N/A	N/A	N/A	N/A	N/A	N/A	N/A	N/A	N/A	N/A	N/A	N/A	-	HMDB0028979	7349-78-2	-
Equol	Equol	Isoflavonoids	243.1019	133.0643	242.0942943	Positive	[M+H]+	C15H14O3	N/A	N/A	N/A	N/A	N/A	N/A	N/A	N/A	N/A	N/A	N/A	4.12596	N/A	N/A	N/A	N/A	N/A	N/A	N/A	N/A	C14131	HMDB0002209	531-95-3	ko01100
Vanillin	Vanillin	Phenols	153.05	93.03	152.047345	Positive	[M+H]+	C8H8O3	N/A	N/A	N/A	N/A	N/A	N/A	N/A	N/A	N/A	N/A	36.45726	N/A	N/A	N/A	N/A	N/A	N/A	N/A	N/A	N/A	-	HMDB0012308	121-33-5	-
Val-Met	Val-Met	Small Peptide	249.12674	150.0594	248.119463	Positive	[M+H]+	C10H20N2O3S	N/A	N/A	N/A	N/A	N/A	N/A	N/A	N/A	N/A	N/A	N/A	N/A	0.1028748	N/A	N/A	N/A	N/A	N/A	N/A	N/A	-	HMDB0029133	14486-09-0	-
S-hexyl-L-glutathione	S-hexyl-L-glutathione	Amino acid derivatives	392.18498	246.1161	391.177707	Positive	[M+H]+	C16H29N3O6S	N/A	N/A	N/A	N/A	N/A	N/A	N/A	N/A	N/A	N/A	N/A	N/A	N/A	N/A	N/A	0.1067754	N/A	N/A	N/A	N/A	-	-	24425-56-7	-
6-ketoLCA	6-ketoLCA	Bile acids	391.28	355.26	390.27701	Positive	[M+H]+	C24H38O4	N/A	N/A	N/A	N/A	N/A	N/A	N/A	4.346172	N/A	N/A	N/A	N/A	N/A	N/A	N/A	N/A	N/A	N/A	N/A	N/A	-	HMDB0000467	2393-61-5	-
L-Carnosine	L-Carnosine	Amino acid derivatives	227.2	156	226.106591	Positive	[M+H]+	C9H14N4O3	N/A	N/A	N/A	N/A	N/A	N/A	N/A	N/A	N/A	N/A	N/A	11.56146	N/A	N/A	N/A	N/A	N/A	N/A	N/A	N/A	C00386	HMDB0000033	305-84-0	ko00340,ko00410,ko01100
Dopa	Dopa	Amino acid derivatives	198	152	197.068809	Positive	[M+H]+	C9H11NO4	N/A	N/A	N/A	N/A	N/A	N/A	N/A	1.775922	N/A	N/A	N/A	N/A	N/A	N/A	N/A	N/A	N/A	N/A	N/A	N/A	C00355	HMDB0000181	59-92-7	ko00350,ko01100,ko04728,ko04917,ko05012,ko05030,ko05031,ko05034
Glutaric-acid	Glutaric acid	Fatty Acyls	131.03	86.8	132.04226	Negative	[M-H]-	C5H8O4	N/A	75.4914	N/A	N/A	N/A	N/A	N/A	N/A	N/A	N/A	N/A	N/A	N/A	N/A	N/A	N/A	N/A	N/A	N/A	N/A	C00489	HMDB0000661	110-94-1	ko00071,ko00310,ko01100
Ethylmalonic-acid	Ethylmalonic acid	Organic acid And Its derivatives	131	87.1	132.04226	Negative	[M-H]-	C5H8O4	N/A	N/A	N/A	N/A	N/A	N/A	N/A	N/A	N/A	N/A	71.9868	N/A	N/A	N/A	N/A	N/A	N/A	N/A	N/A	N/A	-	HMDB0000622	601-75-2	-
3-(2-Hydroxyphenyl)propanoic-acid	3-(2-Hydroxyphenyl)propanoic acid	Benzene and substituted derivatives	165.3	121.2	166.062995	Negative	[M-H]-	C9H10O3	N/A	N/A	N/A	N/A	N/A	N/A	N/A	N/A	N/A	3.14721	N/A	N/A	N/A	N/A	N/A	N/A	N/A	N/A	N/A	N/A	C01198	HMDB0033752	495-78-3	ko00360,ko01100
4-Methoxyphenylacetic-acid	4-Methoxyphenylacetic acid	Organic acid And Its derivatives	165	106	166.062995	Negative	[M-H]-	C9H10O3	N/A	N/A	N/A	N/A	N/A	N/A	N/A	N/A	N/A	0.2629746	N/A	N/A	N/A	N/A	N/A	N/A	N/A	N/A	N/A	N/A	-	HMDB0002072	104-01-8	-
Methylglutaric-acid	Methylglutaric acid	Organic acid And Its derivatives	145.05	101.06	146.05791	Negative	[M-H]-	C6H10O4	N/A	10.04058	N/A	N/A	N/A	N/A	N/A	N/A	N/A	N/A	N/A	N/A	N/A	N/A	N/A	N/A	N/A	N/A	N/A	N/A	-	HMDB0000752	626-51-7	-
Pro-Tyr	Pro-Tyr	Small Peptide	279.13393	70.0653	278.126658	Positive	[M+H]+	C14H18N2O4	N/A	N/A	N/A	N/A	0.1043202	N/A	N/A	N/A	N/A	N/A	N/A	N/A	N/A	N/A	N/A	N/A	N/A	N/A	N/A	N/A	-	HMDB0029029	19786-36-8	-
3-Phenylbutyric-acid	3-Phenylbutyric acid	Organic acid And Its derivatives	163.08	163.08	164.08373	Negative	[M-H]-	C10H12O2	N/A	N/A	N/A	N/A	N/A	N/A	N/A	N/A	N/A	N/A	N/A	N/A	N/A	N/A	N/A	N/A	N/A	N/A	N/A	N/A	-	HMDB0001955	4593-90-2	-
N-(3-Indolylacetyl)-L-isoleucine	N-(3-Indolylacetyl)-L-isoleucine	Amino acid derivatives	289.15467	130.0649	288.147393	Positive	[M+H]+	C16H20N2O3	N/A	N/A	N/A	N/A	N/A	N/A	N/A	N/A	N/A	N/A	N/A	N/A	N/A	N/A	N/A	N/A	N/A	N/A	N/A	N/A	-	-	57105-45-0	-
L-Propargylglycine	L-Propargylglycine	Amino acid derivatives	114.05496	68.0498	113.047679	Positive	[M+H]+	C5H7NO2	N/A	N/A	N/A	N/A	N/A	N/A	N/A	N/A	N/A	N/A	N/A	N/A	N/A	N/A	N/A	N/A	N/A	N/A	N/A	N/A	-	-	23235-01-0	-
Indole-3-acetyl-L-tryptophan	Indole-3-acetyl-L-tryptophan	Amino acid derivatives	362.14992	130.0652	361.142642	Positive	[M+H]+	C21H19N3O3	N/A	N/A	N/A	N/A	N/A	N/A	N/A	N/A	N/A	N/A	N/A	N/A	N/A	N/A	N/A	N/A	N/A	N/A	N/A	N/A	-	-	57105-53-0	-
3,5-Diiodo-tyrosine	3,5-Diiodo-tyrosine	Amino acid derivatives	433.87	387.87	432.867204	Positive	[M+H]+	C9H9I2NO3	N/A	N/A	N/A	N/A	N/A	N/A	N/A	N/A	N/A	N/A	N/A	N/A	N/A	N/A	N/A	N/A	N/A	N/A	N/A	N/A	-	HMDB0003474	300-39-0	-
Vanillylmandelic-acid	Vanillylmandelic acid	Phenols	197.05	137.02	198.052825	Negative	[M-H]-	C9H10O5	N/A	N/A	N/A	N/A	N/A	N/A	N/A	N/A	N/A	N/A	N/A	N/A	N/A	N/A	N/A	N/A	N/A	N/A	N/A	N/A	-	HMDB0000291	55-10-7	-
Cis-L-3-hydroxyproline	Cis-L-3-hydroxyproline	Amino acid derivatives	130.05097	74.0257	131.058244	Negative	[M-H]-	C5H9NO3	N/A	N/A	N/A	N/A	N/A	N/A	N/A	N/A	N/A	N/A	N/A	N/A	N/A	N/A	N/A	N/A	N/A	N/A	N/A	N/A	-	-	567-35-1	-
N-Acetyl-beta-alanine	N-Acetyl-beta-alanine	Amino acid derivatives	130.05097	88.04	131.058244	Negative	[M-H]-	C5H9NO3	N/A	N/A	N/A	N/A	N/A	N/A	N/A	N/A	N/A	N/A	N/A	N/A	N/A	N/A	N/A	N/A	N/A	N/A	N/A	N/A	-	HMDB0061880	3025-95-4	-
3-Chloro-L-Tyrosine	3-Chloro-L-Tyrosine	Amino acid derivatives	216.1	170.1	215.04	Positive	[M+H]+	C9H10ClNO3	N/A	N/A	N/A	N/A	N/A	N/A	N/A	N/A	N/A	N/A	N/A	N/A	N/A	N/A	N/A	N/A	N/A	N/A	N/A	N/A	-	HMDB0001885	7423-93-0	-
2,4-Dihydroxypteridine	2,4-Dihydroxypteridine	Pyridines and derivatives	165.04	120.02	164.033426	Positive	[M+H]+	C6H4N4O2	N/A	N/A	N/A	N/A	N/A	N/A	N/A	N/A	N/A	N/A	N/A	N/A	N/A	N/A	N/A	N/A	N/A	N/A	N/A	N/A	-	-	487-21-8	-
D-Glucuronolactone	D-Glucuronolactone	Alcohols and polyols	175.024288	112.9	176.03209	Negative	[M-H]-	C6H8O6	N/A	N/A	N/A	N/A	N/A	N/A	N/A	N/A	N/A	N/A	N/A	N/A	N/A	N/A	N/A	N/A	N/A	N/A	N/A	N/A	C02670	HMDB0006355	32449-92-6	ko00053,ko01100
2,3-Dimethylsuccinic-acid	2,3-Dimethylsuccinic acid	Organic acid And Its derivatives	145.05063	127.0415	146.05791	Negative	[M-H]-	C6H10O4	N/A	N/A	N/A	N/A	N/A	N/A	N/A	N/A	N/A	N/A	N/A	N/A	N/A	N/A	N/A	N/A	N/A	N/A	N/A	N/A	-	-	13545-04-5	-
DL-O-tyrosine	DL-O-tyrosine	Amino acid derivatives	182.08117	119.0492	181.073894	Positive	[M+H]+	C9H11NO3	N/A	N/A	N/A	N/A	N/A	N/A	N/A	N/A	N/A	N/A	N/A	N/A	N/A	N/A	N/A	N/A	N/A	N/A	N/A	N/A	-	HMDB0006050	2370-61-8	-
N-Carbobenzyloxyglycine	N-Carbobenzyloxyglycine	Amino acid derivatives	208.06153	100.0048	209.068809	Negative	[M-H]-	C10H11NO4	N/A	N/A	N/A	N/A	N/A	N/A	N/A	N/A	N/A	N/A	N/A	N/A	N/A	N/A	N/A	N/A	N/A	N/A	N/A	N/A	-	-	1138-80-3	-
N-(3-Indolylacetyl)-L-valine	N-(3-Indolylacetyl)-L-valine	Amino acid derivatives	275.13902	130.06	274.131743	Positive	[M+H]+	C15H18N2O3	N/A	N/A	N/A	N/A	N/A	N/A	N/A	N/A	N/A	N/A	N/A	N/A	N/A	N/A	N/A	N/A	N/A	N/A	N/A	N/A	-	-	57105-42-7	-
4-Methylhippuric-Acid	4-Methylhippuric Acid	Amino acid derivatives	194.08117	119.0492	193.073894	Positive	[M+H]+	C10H11NO3	N/A	N/A	N/A	N/A	N/A	N/A	N/A	N/A	N/A	N/A	N/A	N/A	N/A	N/A	N/A	N/A	N/A	N/A	N/A	N/A	-	HMDB0013292	27115-50-0	-
Acetaminophen	Acetaminophen	Phenols	152.0706	110	151.063329	Positive	[M+H]+	C8H9NO2	N/A	N/A	N/A	N/A	N/A	N/A	N/A	N/A	N/A	N/A	N/A	N/A	N/A	N/A	N/A	N/A	N/A	N/A	N/A	N/A	C06804	HMDB0001859	103-90-2	ko04976
3-Methoxytyramine	3-Methoxytyramine	Phenols	167.9	151	167.094629	Positive	[M+H]+	C9H13NO2	N/A	N/A	N/A	N/A	N/A	N/A	N/A	N/A	N/A	N/A	N/A	N/A	N/A	N/A	N/A	N/A	N/A	N/A	N/A	N/A	C05587	HMDB0000022	554-52-9	ko00350,ko01100,ko04728
alpha-Methyl-DL-phenylalanine	alpha-Methyl-DL-phenylalanine	Amino acid derivatives	180.10191	134.0966	179.094629	Positive	[M+H]+	C10H13NO2	N/A	N/A	N/A	N/A	N/A	N/A	N/A	N/A	N/A	N/A	N/A	N/A	N/A	N/A	N/A	N/A	N/A	N/A	N/A	N/A	-	HMDB0029223	1132-26-9	-
Trehalose	Trehalose	Sugars	341.1	59.01	342.116215	Negative	[M-H]-	C12H22O11	N/A	N/A	N/A	N/A	N/A	N/A	N/A	N/A	N/A	N/A	N/A	N/A	N/A	N/A	N/A	N/A	N/A	N/A	N/A	N/A	C01083	HMDB0000975	99-20-7	ko00500,ko01100,ko02010
3,4-Dihydroxyphenylacetic-Acid	3,4-Dihydroxyphenylacetic Acid	Phenols	167.034435	123	168.04226	Negative	[M-H]-	C8H8O4	N/A	N/A	N/A	N/A	N/A	N/A	N/A	N/A	N/A	N/A	N/A	N/A	N/A	N/A	N/A	N/A	N/A	N/A	N/A	N/A	C01161	HMDB0001336	102-32-9	ko00350,ko01100,ko04728,ko05030,ko05031,ko05034
4-Hydroxytoluene	4-Hydroxytoluene	Phenols	109	80	108.1378	Positive	[M+H]+	C7H8O	N/A	N/A	N/A	N/A	N/A	N/A	N/A	N/A	N/A	N/A	N/A	N/A	N/A	N/A	N/A	N/A	N/A	N/A	N/A	N/A	C01468	HMDB0001858	106-44-5	ko01100,ko04974
Ribose-5-phosphate-Barium-Salt-Hydrate	Ribose-5-phosphate Barium Salt Hydrate	Phosphate sugars	229.0123	96.9698	365.42	Negative	[M-H]-	C5H9BaO8P	N/A	N/A	N/A	N/A	N/A	N/A	N/A	N/A	N/A	N/A	N/A	N/A	N/A	N/A	N/A	N/A	N/A	N/A	N/A	N/A	-	-	15673-79-7	-
Methylmalonate	Methylmalonate	Organic acid And Its derivatives	117	73	118.02661	Negative	[M-H]-	C4H6O4	N/A	N/A	N/A	N/A	N/A	N/A	N/A	N/A	N/A	N/A	N/A	N/A	N/A	N/A	N/A	N/A	N/A	N/A	N/A	N/A	C02170	HMDB0000202	516-05-2	ko00240,ko00280,ko00640,ko01100
Salicylamide	Salicylamide	Phenols	136.04	93.04	137.047679	Negative	[M-H]-	C7H7NO2	N/A	N/A	N/A	N/A	N/A	N/A	N/A	N/A	N/A	N/A	N/A	N/A	N/A	N/A	N/A	N/A	N/A	N/A	N/A	N/A	-	HMDB0015687	65-45-2	-
L-Tyrosinamide	L-Tyrosinamide	Amino acid derivatives	181.09715	136.0754	180.089878	Positive	[M+H]+	C9H12N2O2	N/A	N/A	N/A	N/A	N/A	N/A	N/A	N/A	N/A	N/A	N/A	N/A	N/A	N/A	N/A	N/A	N/A	N/A	N/A	N/A	-	HMDB0013319	4985-46-0	-
Hexylamine	Hexylamine	Amines	102.3	85.2	101.120449	Positive	[M+H]+	C6H15N	N/A	N/A	N/A	N/A	N/A	N/A	N/A	N/A	N/A	N/A	N/A	N/A	N/A	N/A	N/A	N/A	N/A	N/A	N/A	N/A	C08306	HMDB0032323	111-26-2	-
L-threo-phenylserine	L-threo-phenylserine	Amino acid derivatives	182.08117	118.0659	181.073894	Positive	[M+H]+	C9H11NO3	N/A	N/A	N/A	N/A	N/A	N/A	N/A	N/A	N/A	N/A	N/A	N/A	N/A	N/A	N/A	N/A	N/A	N/A	N/A	N/A	-	HMDB0002184	6254-48-4	-
Oxaceprol	Oxaceprol	Amino acid derivatives	174.07608	86.0604	173.068809	Positive	[M+H]+	C7H11NO4	N/A	N/A	N/A	N/A	N/A	N/A	N/A	N/A	N/A	N/A	N/A	N/A	N/A	N/A	N/A	N/A	N/A	N/A	N/A	N/A	-	-	33996-33-7	-
3-Hydroxy-L-phenylalanine	3-Hydroxy-L-phenylalanine	Amino acid derivatives	182.08117	136.0756	181.073894	Positive	[M+H]+	C9H11NO3	N/A	N/A	N/A	N/A	N/A	N/A	N/A	N/A	N/A	N/A	N/A	N/A	N/A	N/A	N/A	N/A	N/A	N/A	N/A	N/A	-	HMDB0059720	587-33-7	-
Xyluose-5-phosphate	Xyluose-5-phosphate	Phosphate sugars	229.2	97	230.019157	Negative	[M-H]-	C5H11O8P	N/A	N/A	N/A	N/A	N/A	N/A	N/A	N/A	N/A	N/A	N/A	N/A	N/A	N/A	N/A	N/A	N/A	N/A	N/A	N/A	C00231	HMDB0000868	4212-65-1	ko00030,ko00040,ko00053,ko01100,ko01200,ko01230,ko04918
Glyceraldehyde-3-phosphate	Glyceraldehyde 3-phosphate	Phosphoric acids	243.06391	78.96	244.071192	Negative	[M-H]-	C7H17O7P	N/A	N/A	N/A	N/A	N/A	N/A	N/A	N/A	N/A	N/A	N/A	N/A	N/A	N/A	N/A	N/A	N/A	N/A	N/A	N/A	-	-	93965-35-6	-
Shikimic-acid	Shikimic acid	Alcohols and polyols	172.8	93	174.052825	Negative	[M-H]-	C7H10O5	N/A	N/A	N/A	N/A	N/A	N/A	N/A	N/A	N/A	N/A	N/A	N/A	N/A	N/A	N/A	N/A	N/A	N/A	N/A	N/A	C00493	HMDB0003070	138-59-0	ko00400,ko01100,ko01230,ko01240
Acetylcysteine	Acetylcysteine	Amino acid derivatives	164.04	76.02	163.030314	Positive	[M+H]+	C5H9NO3S	N/A	N/A	N/A	N/A	N/A	N/A	N/A	N/A	N/A	N/A	N/A	N/A	N/A	N/A	N/A	N/A	N/A	N/A	N/A	N/A	-	HMDB0001890	616-91-1	-
Lys-Leu	Lys-Leu	Small Peptide	260.19687	84.0807	259.189592	Positive	[M+H]+	C12H25N3O3	N/A	N/A	N/A	N/A	N/A	N/A	N/A	N/A	N/A	N/A	N/A	N/A	N/A	N/A	N/A	N/A	N/A	N/A	N/A	N/A	-	HMDB0028955	7369-79-1	-
6-Hydroxynicotinic-acid	6-Hydroxynicotinic acid	Pyridines and derivatives	140.03	122.02	139.026944	Positive	[M+H]+	C6H5NO3	N/A	N/A	N/A	N/A	N/A	N/A	N/A	N/A	N/A	N/A	N/A	N/A	N/A	N/A	N/A	N/A	N/A	N/A	N/A	N/A	-	HMDB0002658	5006-66-6	-
Leu-Leu-Leu	Leu-Leu-Leu	Small Peptide	358.27003	227.1749	357.262757	Positive	[M+H]+	C18H35N3O4	N/A	N/A	N/A	N/A	N/A	N/A	N/A	N/A	N/A	N/A	N/A	N/A	N/A	N/A	N/A	N/A	N/A	N/A	N/A	N/A	-	HMDB0094648	10329-75-6	-
Ile-Pro-Ile	Ile-Pro-Ile	Small Peptide	342.23873	229.1556	341.231457	Positive	[M+H]+	C17H31N3O4	N/A	N/A	N/A	N/A	N/A	N/A	N/A	N/A	N/A	N/A	N/A	N/A	N/A	N/A	N/A	N/A	N/A	N/A	N/A	N/A	-	-	90614-48-5	-
Phe-Ala	Phe-Ala	Small Peptide	237.12337	120.0815	236.116093	Positive	[M+H]+	C12H16N2O3	N/A	N/A	N/A	N/A	N/A	N/A	N/A	N/A	N/A	N/A	N/A	N/A	N/A	N/A	N/A	N/A	N/A	N/A	N/A	N/A	-	HMDB0028988	3918-87-4	-
(S)-4-Fluorophenylglycine	(S)-4-Fluorophenylglycine	Amino acid derivatives	170.06118	97.0454	169.053904	Positive	[M+H]+	C8H8FNO2	N/A	N/A	N/A	N/A	N/A	N/A	N/A	N/A	N/A	N/A	N/A	N/A	N/A	N/A	N/A	N/A	N/A	N/A	N/A	N/A	-	-	19883-57-9	-
5-Methoxytryptophol	5-Methoxytryptophol	Amino acid derivatives	192.10191	159.07	191.094629	Positive	[M+H]+	C11H13NO2	N/A	N/A	N/A	N/A	N/A	N/A	N/A	N/A	N/A	N/A	N/A	N/A	N/A	N/A	N/A	N/A	N/A	N/A	N/A	N/A	-	HMDB0001896	712-09-4	-
h-d-tyr-otbu	tert-butyl d-tyrosinate	Amino acid derivatives	238.14377	165.0551	237.136494	Positive	[M+H]+	C13H19NO3	N/A	N/A	N/A	N/A	N/A	N/A	N/A	N/A	N/A	N/A	N/A	N/A	N/A	N/A	N/A	N/A	N/A	N/A	N/A	N/A	-	-	87553-74-0	-
N8-Acetylspermidine	N8-Acetylspermidine	Amines	188.17574	171.15	187.168462	Positive	[M+H]+	C9H21N3O	N/A	N/A	N/A	N/A	N/A	N/A	N/A	N/A	N/A	N/A	N/A	N/A	N/A	N/A	N/A	N/A	N/A	N/A	N/A	N/A	-	HMDB0002189	34450-15-2	-
Lipoamide	Lipoamide	Amines	206.07	161.05	205.059504	Positive	[M+H]+	C8H15NOS2	N/A	N/A	N/A	N/A	N/A	N/A	N/A	N/A	N/A	N/A	N/A	N/A	N/A	N/A	N/A	N/A	N/A	N/A	N/A	N/A	-	HMDB0000962	940-69-2	-
Gly-Gly-Phe	Gly-Gly-Phe	Small Peptide	280.12918	166.0857	279.121907	Positive	[M+H]+	C13H17N3O4	N/A	N/A	N/A	N/A	N/A	N/A	N/A	N/A	N/A	N/A	N/A	N/A	N/A	N/A	N/A	N/A	N/A	N/A	N/A	N/A	-	-	6234-26-0	-
2-Furoylglycine	2-Furoylglycine	Amino acid derivatives	170.04478	95.0129	169.037509	Positive	[M+H]+	C7H7NO4	N/A	N/A	N/A	N/A	N/A	N/A	N/A	N/A	N/A	N/A	N/A	N/A	N/A	N/A	N/A	N/A	N/A	N/A	N/A	N/A	-	-	5657-19-2	-
Enterostatin	Enterostatin	Small Peptide	497.28306	497.2809	496.275782	Positive	[M+H]+	C21H36N8O6	N/A	N/A	N/A	N/A	N/A	N/A	N/A	N/A	N/A	N/A	N/A	N/A	N/A	N/A	N/A	N/A	N/A	N/A	N/A	N/A	-	HMDB0006117	117830-79-2	-
Tyr-Tyr	Tyr-Tyr	Small Peptide	345.1445	136.0755	344.137223	Positive	[M+H]+	C18H20N2O5	N/A	N/A	N/A	N/A	N/A	N/A	N/A	N/A	N/A	N/A	N/A	N/A	N/A	N/A	N/A	N/A	N/A	N/A	N/A	N/A	-	HMDB0029117	1050-28-8	-
N-(3-Indolylacetyl)-L-phenylalanine	N-(3-Indolylacetyl)-L-phenylalanine	Amino acid derivatives	323.13902	130.0646	322.131743	Positive	[M+H]+	C19H18N2O3	N/A	N/A	N/A	N/A	N/A	N/A	N/A	N/A	N/A	N/A	N/A	N/A	N/A	N/A	N/A	N/A	N/A	N/A	N/A	N/A	-	-	57105-50-7	-
Leu-Tyr	Leu-Tyr	Small Peptide	295.16523	86.0965	294.157958	Positive	[M+H]+	C15H22N2O4	N/A	N/A	N/A	N/A	N/A	N/A	N/A	N/A	N/A	N/A	N/A	N/A	N/A	N/A	N/A	N/A	N/A	N/A	N/A	N/A	-	HMDB0028941	968-21-8	-
AFMK	N-Acetyl-N-formyl-5-methoxykynurenamine	Amino acid derivatives	265.11828	178.0861	264.111008	Positive	[M+H]+	C13H16N2O4	N/A	N/A	N/A	N/A	N/A	N/A	N/A	N/A	N/A	N/A	N/A	N/A	N/A	N/A	N/A	N/A	N/A	N/A	N/A	N/A	-	HMDB0004259	52450-38-1	-
Phe-Tyr	Phe-Tyr	Small Peptide	329.14958	120.081	328.142308	Positive	[M+H]+	C18H20N2O4	N/A	N/A	N/A	N/A	N/A	N/A	N/A	N/A	N/A	N/A	N/A	N/A	N/A	N/A	N/A	N/A	N/A	N/A	N/A	N/A	-	HMDB0029007	17355-18-9	-
Gly-Met	Gly-Met	Small Peptide	207.07979	133.0323	206.072513	Positive	[M+H]+	C7H14N2O3S	N/A	N/A	N/A	N/A	N/A	N/A	N/A	N/A	N/A	N/A	N/A	N/A	N/A	N/A	N/A	N/A	N/A	N/A	N/A	N/A	-	HMDB0028847	554-94-9	-
Lys-Tyr-Lys	Lys-Tyr-Lys	Small Peptide	438.2711	129.1017	437.26382	Positive	[M+H]+	C21H35N5O5	N/A	N/A	N/A	N/A	N/A	N/A	N/A	N/A	N/A	N/A	N/A	N/A	N/A	N/A	N/A	N/A	N/A	N/A	N/A	N/A	-	-	35193-18-1	-
H-Phe-Trp-OH	H-Phe-Trp-OH	Small Peptide	352.16	120.08	351.158292	Positive	[M+H]+	C20H21N3O3	N/A	N/A	N/A	N/A	N/A	N/A	N/A	N/A	N/A	N/A	N/A	N/A	N/A	N/A	N/A	N/A	N/A	N/A	N/A	N/A	-	HMDB0029006	24587-41-5	-
Phe-Asn	Phe Asn	Small Peptide	280.1	120	279.121907	Positive	[M+H]+	C13H17N3O4	N/A	N/A	N/A	N/A	N/A	N/A	N/A	N/A	N/A	N/A	N/A	N/A	N/A	N/A	N/A	N/A	N/A	N/A	N/A	N/A	-	HMDB0028990	39537-20-7	-
N-Cbz-L-leucine	N-Benzyloxycarbonyl-L-leucine	Amino acid derivatives	266.13868	91.0545	265.131409	Positive	[M+H]+	C14H19NO4	N/A	N/A	N/A	N/A	N/A	N/A	N/A	N/A	N/A	N/A	N/A	N/A	N/A	N/A	N/A	N/A	N/A	N/A	N/A	N/A	-	-	2018-66-8	-
H-His-Trp-OH	H-His-Trp-OH	Small Peptide	342.1	342.1	341.14879	Positive	[M+H]+	C17H19N5O3	N/A	N/A	N/A	N/A	N/A	N/A	N/A	N/A	N/A	N/A	N/A	N/A	N/A	N/A	N/A	N/A	N/A	N/A	N/A	N/A	-	HMDB0028896	23403-90-9	-
Acetylcholine	Acetylcholine	Amines	146.2	87.1	146.118104	Positive	[M+H]+	C7H16NO2	N/A	N/A	N/A	N/A	N/A	N/A	N/A	N/A	N/A	N/A	N/A	N/A	N/A	N/A	N/A	N/A	N/A	N/A	N/A	N/A	C01996	HMDB0000895	51-84-3	ko00564,ko04024,ko04080,ko04721,ko04725,ko04742,ko04810,ko04911,ko04970,ko04971,ko04972,ko04976,ko05022,ko05033
N-(3-Indolylacetyl)-L-alanine	N-(3-Indolylacetyl)-L-alanine	Amino acid derivatives	247.10772	90.0552	246.100443	Positive	[M+H]+	C13H14N2O3	N/A	N/A	N/A	N/A	N/A	N/A	N/A	N/A	N/A	N/A	N/A	N/A	N/A	N/A	N/A	N/A	N/A	N/A	N/A	N/A	-	-	57105-39-2	-
gama-glutamylalanine	gama-glutamylalanine	Small Peptide	217.1	88.1	218.090273	Negative	[M-H]-	C8H14N2O5	N/A	N/A	N/A	N/A	N/A	N/A	N/A	N/A	N/A	N/A	N/A	N/A	N/A	N/A	N/A	N/A	N/A	N/A	N/A	N/A	C03740	HMDB0006248	5875-41-2	ko00480,ko01100
N-Acetyl-S-(N-methylcarbamoyl)-L-cysteine	N-Acetyl-S-(N-methylcarbamoyl)-L-cysteine	Amino acid derivatives	221.05906	122.0268	220.051778	Positive	[M+H]+	C7H12N2O4S	N/A	N/A	N/A	N/A	N/A	N/A	N/A	N/A	N/A	N/A	N/A	N/A	N/A	N/A	N/A	N/A	N/A	N/A	N/A	N/A	-	HMDB0041942	103974-29-4	-
Val-Pro-Leu	Val-Pro-Leu	Small Peptide	328.22308	229.1553	327.215807	Positive	[M+H]+	C16H29N3O4	N/A	N/A	N/A	N/A	N/A	N/A	N/A	N/A	N/A	N/A	N/A	N/A	N/A	N/A	N/A	N/A	N/A	N/A	N/A	N/A	-	-	90614-49-6	-
N-Acetyl-S-propyl-L-cysteine	N-Acetyl-S-propyl-L-cysteine	Amino acid derivatives	206.08454	147.0472	205.077264	Positive	[M+H]+	C8H15NO3S	N/A	N/A	N/A	N/A	N/A	N/A	N/A	N/A	N/A	N/A	N/A	N/A	N/A	N/A	N/A	N/A	N/A	N/A	N/A	N/A	-	-	14402-54-1	-
O-benzyl-L-serine	O-benzyl-L-serine	Amino acid derivatives	196.09682	91.0549	195.089544	Positive	[M+H]+	C10H13NO3	N/A	N/A	N/A	N/A	N/A	N/A	N/A	N/A	N/A	N/A	N/A	N/A	N/A	N/A	N/A	N/A	N/A	N/A	N/A	N/A	-	-	4726-96-9	-
3-Bromotyrosine	3-Bromotyrosine	Amino acid derivatives	259.99168	213.9587	258.984409	Positive	[M+H]+	C9H10BrNO3	N/A	N/A	N/A	N/A	N/A	N/A	N/A	N/A	N/A	N/A	N/A	N/A	N/A	N/A	N/A	N/A	N/A	N/A	N/A	N/A	C17079	HMDB0005874	54788-30-6	-
Pyridoxine	Pyridoxine	Pyridines and derivatives	170.08	152.07	169.073894	Positive	[M+H]+	C8H11NO3	N/A	N/A	N/A	N/A	N/A	N/A	N/A	N/A	N/A	N/A	N/A	N/A	N/A	N/A	N/A	N/A	N/A	N/A	N/A	N/A	-	HMDB0000239	65-23-6	-
N-Phenylacetylphenylalanine	N-Phenylacetylphenylalanine	Amino acid derivatives	284.13	120.08	283.120844	Positive	[M+H]+	C17H17NO3	N/A	N/A	N/A	N/A	N/A	N/A	N/A	N/A	N/A	N/A	N/A	N/A	N/A	N/A	N/A	N/A	N/A	N/A	N/A	N/A	-	HMDB0002372	738-75-0	-
Thyrotropin-releasing-hormone	Thyrotropin releasing hormone	Small Peptide	361.16298	167.0461	362.170254	Negative	[M-H]-	C16H22N6O4	N/A	N/A	N/A	N/A	N/A	N/A	N/A	N/A	N/A	N/A	N/A	N/A	N/A	N/A	N/A	N/A	N/A	N/A	N/A	N/A	-	HMDB0060080	24305-27-9	-
O-phosphate-L-tyrosine	O-phosphate-L-tyrosine	Amino acid derivatives	262.0475	216.0405	261.040226	Positive	[M+H]+	C9H12NO6P	N/A	N/A	N/A	N/A	N/A	N/A	N/A	N/A	N/A	N/A	N/A	N/A	N/A	N/A	N/A	N/A	N/A	N/A	N/A	N/A	C06501	HMDB0006049	21820-51-9	-
Quinoline-2-carboxylic-acid	Quinoline-2-carboxylic acid	Quinolines and derivatives	174.0555477	128.0596	173.047679	Positive	[M+H]+	C10H7NO2	N/A	N/A	N/A	N/A	N/A	N/A	N/A	N/A	N/A	N/A	N/A	N/A	N/A	N/A	N/A	N/A	N/A	N/A	N/A	N/A	C06325	HMDB0000842	93-10-7	-
2-Amino-2-deoxymannose	2-Amino-2-deoxymannose	Sugars	180.08759	72.0466	179.079374	Positive	[M+H]+	C6H13NO5	N/A	N/A	N/A	N/A	N/A	N/A	N/A	N/A	N/A	N/A	N/A	N/A	N/A	N/A	N/A	N/A	N/A	N/A	N/A	N/A	-	-	5505-63-5(2636-92-2)	-
Methionylglycine	Methionylglycine	Amino acid derivatives	207.07979	104.0532	206.072513	Positive	[M+H]+	C7H14N2O3S	N/A	N/A	N/A	N/A	N/A	N/A	N/A	N/A	N/A	N/A	N/A	N/A	N/A	N/A	N/A	N/A	N/A	N/A	N/A	N/A	-	HMDB0028973	7403-12-5	-
Quinoline-4-carboxylic-acid	Quinoline-4-carboxylic acid	Quinolines and derivatives	174.05	146.06	173.047679	Positive	[M+H]+	C10H7NO2	N/A	N/A	N/A	N/A	N/A	N/A	N/A	N/A	N/A	N/A	N/A	N/A	N/A	N/A	N/A	N/A	N/A	N/A	N/A	N/A	-	-	486-74-8	-
PA	Propionic Acid	SCFA	210.08732	154.06	209.08004	Positive	[M+H]+	C9H11N3O3	N/A	N/A	N/A	N/A	N/A	N/A	N/A	N/A	N/A	N/A	N/A	N/A	N/A	N/A	N/A	N/A	N/A	N/A	N/A	N/A	C00163	HMDB0000237	79-09-4	ko00640,ko00760,ko01100,ko04973,ko04974
BA	Butyric Acid	SCFA	224.10297	138.0427	223.09569	Positive	[M+H]+	C10H13N3O3	N/A	N/A	N/A	N/A	N/A	N/A	N/A	N/A	N/A	N/A	N/A	N/A	N/A	N/A	N/A	N/A	N/A	N/A	N/A	N/A	C00246	HMDB0000039	107-92-6	ko00650,ko01100,ko04973,ko04974
VA	Valeric Acid	SCFA	238.11862	138.0427	237.11134	Positive	[M+H]+	C11H15N3O3	N/A	N/A	N/A	N/A	N/A	N/A	N/A	N/A	N/A	N/A	N/A	N/A	N/A	N/A	N/A	N/A	N/A	N/A	N/A	N/A	C00803	HMDB0000892	109-52-4	-
N-Glycyl-L-Leucine	N-Glycyl-L-Leucine	Small Peptide	189.1	86	188.116093	Positive	[M+H]+	C8H16N2O3	N/A	N/A	N/A	N/A	N/A	N/A	N/A	N/A	N/A	N/A	N/A	N/A	N/A	N/A	N/A	N/A	N/A	N/A	N/A	N/A	C02155	HMDB0000759	869-19-2	-
Gly-Ile	Gly-Ile	Small Peptide	189.1238198	132.1063	188.116093	Positive	[M+H]+	C8H16N2O3	N/A	N/A	N/A	N/A	N/A	N/A	N/A	N/A	N/A	N/A	N/A	N/A	N/A	N/A	N/A	N/A	N/A	N/A	N/A	N/A	-	-	19461-38-2	-
dl-Alanyl-dl-leucine	dl-Alanyl-dl-leucine	Small Peptide	201.12447	157.1363	202.131743	Negative	[M-H]-	C9H18N2O3	N/A	N/A	N/A	N/A	N/A	N/A	N/A	N/A	N/A	N/A	N/A	N/A	N/A	N/A	N/A	N/A	N/A	N/A	N/A	N/A	-	HMDB0028691	1999-42-4	-
His-Tyr	His-Tyr	Small Peptide	319.14008	110.0713	318.132806	Positive	[M+H]+	C15H18N4O4	N/A	N/A	N/A	N/A	N/A	N/A	N/A	N/A	N/A	N/A	N/A	N/A	N/A	N/A	N/A	N/A	N/A	N/A	N/A	N/A	-	HMDB0028897	35979-00-1	-
Met-Tyr	Met-Tyr	Small Peptide	313.12166	104.0531	312.114378	Positive	[M+H]+	C14H20N2O4S	N/A	N/A	N/A	N/A	N/A	N/A	N/A	N/A	N/A	N/A	N/A	N/A	N/A	N/A	N/A	N/A	N/A	N/A	N/A	N/A	-	HMDB0028985	13589-04-3	-
Tyr-Ala	Tyr-Ala	Small Peptide	253.11828	136.0756	252.111008	Positive	[M+H]+	C12H16N2O4	N/A	N/A	N/A	N/A	N/A	N/A	N/A	N/A	N/A	N/A	N/A	N/A	N/A	N/A	N/A	N/A	N/A	N/A	N/A	N/A	-	HMDB0029098	730-08-5	-
S-Allylcysteine	S-Allylcysteine	Amino acid derivatives	162.05833	73.01	161.051049	Positive	[M+H]+	C6H11NO2S	N/A	N/A	N/A	N/A	N/A	N/A	N/A	N/A	N/A	N/A	N/A	N/A	N/A	N/A	N/A	N/A	N/A	N/A	N/A	N/A	-	HMDB0034323	21593-77-1	-
Ala-Phe	Ala-Phe	Small Peptide	237.1237809	120.0808	236.116093	Positive	[M+H]+	C12H16N2O3	N/A	N/A	N/A	N/A	N/A	N/A	N/A	N/A	N/A	N/A	N/A	N/A	N/A	N/A	N/A	N/A	N/A	N/A	N/A	N/A	C05770	-	3061-90-3	ko00860,ko01100,ko01240
ALA-PRO	L-Alanyl-L-proline	Small Peptide	187.10772	116.07	186.100443	Positive	[M+H]+	C8H14N2O3	N/A	N/A	N/A	N/A	N/A	N/A	N/A	N/A	N/A	N/A	N/A	N/A	N/A	N/A	N/A	N/A	N/A	N/A	N/A	N/A	-	HMDB0028695	13485-59-1	-
Trimethylamine	Trimethylamine	Amines	60.3	44	59.073499	Positive	[M+H]+	C3H9N	N/A	N/A	N/A	N/A	N/A	N/A	N/A	N/A	N/A	N/A	N/A	N/A	N/A	N/A	N/A	N/A	N/A	N/A	N/A	N/A	C00565	HMDB0000906	75-50-3	ko01100,ko01200
N-Acetylcadaverine	N-Acetylcadaverine	Amines	145.13354	86.0968	144.126263	Positive	[M+H]+	C7H16N2O	N/A	N/A	N/A	N/A	N/A	N/A	N/A	N/A	N/A	N/A	N/A	N/A	N/A	N/A	N/A	N/A	N/A	N/A	N/A	N/A	-	HMDB0002284	32343-73-0	-
Putrescine	Putrescine	Amines	89	72	88.100048	Positive	[M+H]+	C4H12N2	N/A	N/A	N/A	N/A	N/A	N/A	N/A	N/A	N/A	N/A	N/A	N/A	N/A	N/A	N/A	N/A	N/A	N/A	N/A	N/A	C00134	HMDB0001414	110-60-1	ko00330,ko00470,ko00480,ko01100,ko02010,ko04148,ko04974
5-METHOXYTRYPTAMINE	5-METHOXYTRYPTAMINE	Amines	191.1	131.2	190.110613	Positive	[M+H]+	C11H14N2O	N/A	N/A	N/A	N/A	N/A	N/A	N/A	N/A	N/A	N/A	N/A	N/A	N/A	N/A	N/A	N/A	N/A	N/A	N/A	N/A	C05659	HMDB0004095	608-07-1	ko00380
Leu-Ala	Leu-Ala	Small Peptide	203.14	86.1013	202.131743	Positive	[M+H]+	C9H18N2O3	N/A	N/A	N/A	N/A	N/A	N/A	N/A	N/A	N/A	N/A	N/A	N/A	N/A	N/A	N/A	N/A	N/A	N/A	N/A	N/A	-	HMDB0028922	7298-84-2	-
3-Methyl-1-butylamine	3-Methyl-1-butylamine	Amines	88.3	71.2	87.104799	Positive	[M+H]+	C5H13N	N/A	N/A	N/A	N/A	N/A	N/A	N/A	N/A	N/A	N/A	N/A	N/A	N/A	N/A	N/A	N/A	N/A	N/A	N/A	N/A	C02640	HMDB0031659	107-85-7	-
Diethanolamine	Diethanolamine	Amines	106.08626	88.0761	105.078979	Positive	[M+H]+	C4H11NO2	N/A	N/A	N/A	N/A	N/A	N/A	N/A	N/A	N/A	N/A	N/A	N/A	N/A	N/A	N/A	N/A	N/A	N/A	N/A	N/A	-	HMDB0004437	111-42-2	-
DL-Leu-DL-Phe	DL-Leucyl-DL-phenylalanine	Small Peptide	279.17032	86.09	278.163043	Positive	[M+H]+	C15H22N2O3	N/A	N/A	N/A	N/A	N/A	N/A	N/A	N/A	N/A	N/A	N/A	N/A	N/A	N/A	N/A	N/A	N/A	N/A	N/A	N/A	-	-	56217-82-4	-
Glu-Val	Glu-Val	Small Peptide	247.12885	183.1	246.121573	Positive	[M+H]+	C10H18N2O5	N/A	N/A	N/A	N/A	N/A	N/A	N/A	N/A	N/A	N/A	N/A	N/A	N/A	N/A	N/A	N/A	N/A	N/A	N/A	N/A	-	HMDB0028832	5879-06-1	-
Gly-Val	Gly-Val	Small Peptide	175.108	118.08	174.100443	Positive	[M+H]+	C7H14N2O3	N/A	N/A	N/A	N/A	N/A	N/A	N/A	N/A	N/A	N/A	N/A	N/A	N/A	N/A	N/A	N/A	N/A	N/A	N/A	N/A	-	HMDB0028854	1963-21-9	-
Leucyl-Glycine	Leucyl-Glycine	Small Peptide	189.12	86.1	188.116093	Positive	[M+H]+	C8H16N2O3	N/A	N/A	N/A	N/A	N/A	N/A	N/A	N/A	N/A	N/A	N/A	N/A	N/A	N/A	N/A	N/A	N/A	N/A	N/A	N/A	-	HMDB0028929	615-82-7	-
cyclo(gly-pro)	cyclo(gly-pro)	Small Peptide	155.0815	70.065	154.074228	Positive	[M+H]+	C7H10N2O2	N/A	N/A	N/A	N/A	N/A	N/A	N/A	N/A	N/A	N/A	N/A	N/A	N/A	N/A	N/A	N/A	N/A	N/A	N/A	N/A	-	-	3705-27-9	-
cyclo(gly-glu)	cyclo(gly-glu)	Small Peptide	187.07133	141.065	186.064058	Positive	[M+H]+	C7H10N2O4	N/A	N/A	N/A	N/A	N/A	N/A	N/A	N/A	N/A	N/A	N/A	N/A	N/A	N/A	N/A	N/A	N/A	N/A	N/A	N/A	-	-	16364-35-5	-
Dethiobiotin	Dethiobiotin	CoEnzyme and vitamins	215.3	197.3	214.131743	Positive	[M+H]+	C10H18N2O3	N/A	N/A	N/A	N/A	N/A	N/A	N/A	N/A	N/A	N/A	N/A	N/A	N/A	N/A	N/A	N/A	N/A	N/A	N/A	N/A	C01909	HMDB0003581	533-48-2	ko00780,ko01100,ko01240
N-3-oxooctanoyl-L-homoserine-lactone	N-3-oxooctanoyl-L-homoserine-lactone	Amino acid derivatives	242.13868	102.0553	241.131409	Positive	[M+H]+	C12H19NO4	N/A	N/A	N/A	N/A	N/A	N/A	N/A	N/A	N/A	N/A	N/A	N/A	N/A	N/A	N/A	N/A	N/A	N/A	N/A	N/A	C11841	-	147795-39-9	-
N-Methyl-aspartic-acid	N-Methyl-aspartic acid	Amino acid derivatives	148.06043	88.0397	147.053159	Positive	[M+H]+	C5H9NO4	N/A	N/A	N/A	N/A	N/A	N/A	N/A	N/A	N/A	N/A	N/A	N/A	N/A	N/A	N/A	N/A	N/A	N/A	N/A	N/A	-	HMDB0002393	6384-92-5	-
Ricinoleic-acid	Ricinoleic acid	Hydroxy fatty acids	297.24	183.14	298.250795	Negative	[M-H]-	C18H34O3	N/A	N/A	N/A	N/A	N/A	N/A	N/A	N/A	N/A	N/A	N/A	N/A	N/A	N/A	N/A	N/A	N/A	N/A	N/A	N/A	-	HMDB0034297	61789-44-4	-
Adrenosterone	Adrenosterone	Hormones and hormone related compunds	301.18	301.18	300.172545	Positive	[M+H]+	C19H24O3	N/A	N/A	N/A	N/A	N/A	N/A	N/A	N/A	N/A	N/A	N/A	N/A	N/A	N/A	N/A	N/A	N/A	N/A	N/A	N/A	-	HMDB0006772	382-45-6	-
Cortisol-21-Acetate	Cortisol 21-Acetate	Hormones and hormone related compunds	405.23	405.23	404.21989	Positive	[M+H]+	C23H32O6	N/A	N/A	N/A	N/A	N/A	N/A	N/A	N/A	N/A	N/A	N/A	N/A	N/A	N/A	N/A	N/A	N/A	N/A	N/A	N/A	-	-	50-03-3	-
11-Hydroxyandrosterone	11-Hydroxyandrosterone	Hormones and hormone related compunds	271.220893	271.2	306.219495	Positive	[M+H-2H2O]+	C19H30O3	N/A	N/A	N/A	N/A	N/A	N/A	N/A	N/A	N/A	N/A	N/A	N/A	N/A	N/A	N/A	N/A	N/A	N/A	N/A	N/A	C14606	HMDB0002984	57-61-4	-
3beta-Hydroxy-5-cholestenoate	3beta-Hydroxy-5-cholestenoate	Hormones and hormone related compunds	415.3	415.3	416.329045	Negative	[M-H]-	C27H44O3	N/A	N/A	N/A	N/A	N/A	N/A	N/A	N/A	N/A	N/A	N/A	N/A	N/A	N/A	N/A	N/A	N/A	N/A	N/A	N/A	-	HMDB0012453	6561-58-6	-
Epinephrine	Epinephrine	Hormones and hormone related compunds	184.097369	166.1	183.089544	Positive	[M+H]+	C9H13NO3	N/A	N/A	N/A	N/A	N/A	N/A	N/A	N/A	N/A	N/A	N/A	N/A	N/A	N/A	N/A	N/A	N/A	N/A	N/A	N/A	C00788	HMDB0000068	51-43-4(1011-74-1)	ko00350,ko01100,ko04024,ko04080,ko04261,ko04923,ko04924,ko05207
Prostaglandin-E2(PGE2)	Prostaglandin E2(PGE2)	Hormones and hormone related compunds	351.22	271.21	352.224975	Negative	[M-H]-	C20H32O5	N/A	N/A	N/A	N/A	N/A	N/A	N/A	N/A	N/A	N/A	N/A	N/A	N/A	N/A	N/A	N/A	N/A	N/A	N/A	N/A	-	HMDB0001220	363-24-6	-
Glycolithocholic-acid-3-sulfate	Glycolithocholic acid-3-sulfate	Bile acids	512.3	512.3	513.276024	Negative	[M-H]-	C26H43NO7S	N/A	N/A	N/A	N/A	N/A	N/A	N/A	N/A	N/A	N/A	N/A	N/A	N/A	N/A	N/A	N/A	N/A	N/A	N/A	N/A	C11301	HMDB0002639	15324-64-8	-
Metanephrine	Metanephrine	Hormones and hormone related compunds	198.1	120.2	197.105194	Positive	[M+H]+	C10H15NO3	N/A	N/A	N/A	N/A	N/A	N/A	N/A	N/A	N/A	N/A	N/A	N/A	N/A	N/A	N/A	N/A	N/A	N/A	N/A	N/A	C05588	HMDB0004063	5001-33-2	ko00350,ko01100
Aldosterone	Aldosterone	Hormones and hormone related compunds	361.4	343.3	360.193675	Positive	[M+H]+	C21H28O5	N/A	N/A	N/A	N/A	N/A	N/A	N/A	N/A	N/A	N/A	N/A	N/A	N/A	N/A	N/A	N/A	N/A	N/A	N/A	N/A	C01780	HMDB0000037	52-39-1	ko00140,ko01100,ko04925,ko04960
Dehydroepiandrosterone	Dehydroepiandrosterone	Hormones and hormone related compunds	271.20893	271.20893	288.20893	Positive	[M+H-H2O]+	C19H28O2	N/A	N/A	N/A	N/A	N/A	N/A	N/A	N/A	N/A	N/A	N/A	N/A	N/A	N/A	N/A	N/A	N/A	N/A	N/A	N/A	C01227	HMDB0000077	53-43-0	ko00140,ko01100,ko04913,ko05200,ko05215
Taurohyocholic-acid	Taurohyocholic acid	Bile acids	514.3	79.8	515.291674	Negative	[M-H]-	C26H45NO7S	N/A	N/A	N/A	N/A	N/A	N/A	N/A	N/A	N/A	N/A	N/A	N/A	N/A	N/A	N/A	N/A	N/A	N/A	N/A	N/A	C15516	HMDB0011637	117997-17-8	-
Estrone	Estrone	Hormones and hormone related compunds	271.3	271.3	270.16198	Positive	[M+H]+	C18H22O2	N/A	N/A	N/A	N/A	N/A	N/A	N/A	N/A	N/A	N/A	N/A	N/A	N/A	N/A	N/A	N/A	N/A	N/A	N/A	N/A	C00468	HMDB0000145	53-16-7	ko00140,ko01100,ko04913,ko04917
17a-Hydroxyprogesterone	17a-Hydroxyprogesterone	Hormones and hormone related compunds	331.2	109	330.219495	Positive	[M+H]+	C21H30O3	N/A	N/A	N/A	N/A	N/A	N/A	N/A	N/A	N/A	N/A	N/A	N/A	N/A	N/A	N/A	N/A	N/A	N/A	N/A	N/A	C01176	HMDB0000374	68-96-2	ko00140,ko01100,ko04913,ko04927,ko04934
5alpha-Pregnane-3,20-dione	5alpha-Pregnane-3,20-dione	Hormones and hormone related compunds	317.3	281.3	316.24023	Positive	[M+H]+	C21H32O2	N/A	N/A	N/A	N/A	N/A	N/A	N/A	N/A	N/A	N/A	N/A	N/A	N/A	N/A	N/A	N/A	N/A	N/A	N/A	N/A	C03681	HMDB0003759	566-65-4	ko00140,ko01100
17alpha-Hydroxypregnenolone	17alpha-Hydroxypregnenolone	Hormones and hormone related compunds	297.3	297.3	332.235145	Positive	[M+H-2H2O]+	C21H32O3	N/A	N/A	N/A	N/A	N/A	N/A	N/A	N/A	N/A	N/A	N/A	N/A	N/A	N/A	N/A	N/A	N/A	N/A	N/A	N/A	C05138	HMDB0000363	387-79-1	ko00140,ko01100,ko04913,ko04927,ko04934
L-Thyronine	L-Thyronine	Hormones and hormone related compunds	274.1085	119.0749	273.100109	Positive	[M+H]+	C15H15NO4	N/A	N/A	N/A	N/A	N/A	N/A	N/A	N/A	N/A	N/A	N/A	N/A	N/A	N/A	N/A	N/A	N/A	N/A	N/A	N/A	-	HMDB0000667	1596-67-4	-
2-Methoxy-Estrone	2-Methoxy Estrone	Hormones and hormone related compunds	301.39	283.39	300.172545	Positive	[M+H]+	C19H24O3	N/A	N/A	N/A	N/A	N/A	N/A	N/A	N/A	N/A	N/A	N/A	N/A	N/A	N/A	N/A	N/A	N/A	N/A	N/A	N/A	C05299	HMDB0000010	362-08-3	ko00140
12-Hydroxyoleic-acid	12-Hydroxyoleic acid	Hydroxy fatty acids	297.2	297.2	298.250795	Negative	[M-H]-	C18H34O3	N/A	N/A	N/A	N/A	N/A	N/A	N/A	N/A	N/A	N/A	N/A	N/A	N/A	N/A	N/A	N/A	N/A	N/A	N/A	N/A	C08365	HMDB0034297	141-22-0	-
Hyocholic-acid	Hyocholic acid	Bile acids	407.4	407.4	408.287575	Negative	[M-H]-	C24H40O5	N/A	N/A	N/A	N/A	N/A	N/A	N/A	N/A	N/A	N/A	N/A	N/A	N/A	N/A	N/A	N/A	N/A	N/A	N/A	N/A	C17649	HMDB0000760	547-75-1	-
Indoxyl-β-D-glucoside	Indoxyl-β-D-glucoside	Indole and Its derivatives	294.1	131.04	295.105589	Negative	[M-H]-	C14H17NO6	N/A	N/A	N/A	N/A	N/A	N/A	N/A	N/A	N/A	N/A	N/A	N/A	N/A	N/A	N/A	N/A	N/A	N/A	N/A	N/A	-	HMDB0061755	487-60-5	-
Tryptophol	Tryptophol	Indole and Its derivatives	162.1	144.1	161.084064	Positive	[M+H]+	C10H11NO	N/A	N/A	N/A	N/A	N/A	N/A	N/A	N/A	N/A	N/A	N/A	N/A	N/A	N/A	N/A	N/A	N/A	N/A	N/A	N/A	C00955	HMDB0003447	526-55-6	ko00380
5-Methoxyindole-3-Acetic-Acid	5-Methoxyindole-3-Acetic Acid	Indole and Its derivatives	206.08	145	205.073894	Positive	[M+H]+	C11H11NO3	N/A	N/A	N/A	N/A	N/A	N/A	N/A	N/A	N/A	N/A	N/A	N/A	N/A	N/A	N/A	N/A	N/A	N/A	N/A	N/A	C05660	HMDB0004096	3471-31-6	ko00380
3-Methyloxindole	3-Methyloxindole	Indole and Its derivatives	148.0759	130.0651	147.068414	Positive	[M+H]+	C9H9NO	N/A	N/A	N/A	N/A	N/A	N/A	N/A	N/A	N/A	N/A	N/A	N/A	N/A	N/A	N/A	N/A	N/A	N/A	N/A	N/A	-	-	1504-06-9	-
Taurodehydrocholic-acid	Taurodehydrocholic acid	Bile acids	508.3	508.3	509.244724	Negative	[M-H]-	C26H39NO7S	N/A	N/A	N/A	N/A	N/A	N/A	N/A	N/A	N/A	N/A	N/A	N/A	N/A	N/A	N/A	N/A	N/A	N/A	N/A	N/A	-	-	517-37-3	-
5-Hydroxytryptophol	5-Hydroxytryptophol	Indole and Its derivatives	178.09	160.08	177.078979	Positive	[M+H]+	C10H11NO2	N/A	N/A	N/A	N/A	N/A	N/A	N/A	N/A	N/A	N/A	N/A	N/A	N/A	N/A	N/A	N/A	N/A	N/A	N/A	N/A	-	HMDB0001855	154-02-9	-
Glycohyodeoxycholic-acid	Glycohyodeoxycholic acid	Bile acids	448.3	73.8	449.314124	Negative	[M-H]-	C26H43NO5	N/A	N/A	N/A	N/A	N/A	N/A	N/A	N/A	N/A	N/A	N/A	N/A	N/A	N/A	N/A	N/A	N/A	N/A	N/A	N/A	-	-	13042-33-6	-
3,7-Dimethyluric-Acid	3,7-Dimethyluric Acid	Imidazopyrimidines	197.07	182.05	196.059641	Positive	[M+H]+	C7H8N4O3	N/A	N/A	N/A	N/A	N/A	N/A	N/A	N/A	N/A	N/A	N/A	N/A	N/A	N/A	N/A	N/A	N/A	N/A	N/A	N/A	-	HMDB0001982	13087-49-5	-
Ursocholic-acid	Ursocholic acid	Bile acids	407.4	407.4	408.287575	Negative	[M-H]-	C24H40O5	N/A	N/A	N/A	N/A	N/A	N/A	N/A	N/A	N/A	N/A	N/A	N/A	N/A	N/A	N/A	N/A	N/A	N/A	N/A	N/A	C17644	HMDB0000917	2955-27-3	-
Scatole	Scatole	Indole and Its derivatives	132.08	117.06	131.073499	Positive	[M+H]+	C9H9N	N/A	N/A	N/A	N/A	N/A	N/A	N/A	N/A	N/A	N/A	N/A	N/A	N/A	N/A	N/A	N/A	N/A	N/A	N/A	N/A	-	HMDB0000466	83-34-1	-
Ethyl-3-indoleacetate	Ethyl 3-indoleacetate	Indole and Its derivatives	204.1	130.07	203.094629	Positive	[M+H]+	C12H13NO2	N/A	N/A	N/A	N/A	N/A	N/A	N/A	N/A	N/A	N/A	N/A	N/A	N/A	N/A	N/A	N/A	N/A	N/A	N/A	N/A	-	-	778-82-5	-
Indole	Indole	Indole and Its derivatives	118.07	91.05	117.057849	Positive	[M+H]+	C8H7N	N/A	N/A	N/A	N/A	N/A	N/A	N/A	N/A	N/A	N/A	N/A	N/A	N/A	N/A	N/A	N/A	N/A	N/A	N/A	N/A	-	HMDB0000738	120-72-9	-
Tryptamine	Tryptamine	Indole and Its derivatives	161.107873	144.1	160.100048	Positive	[M+H]+	C10H12N2	N/A	N/A	N/A	N/A	N/A	N/A	N/A	N/A	N/A	N/A	N/A	N/A	N/A	N/A	N/A	N/A	N/A	N/A	N/A	N/A	C00398	HMDB0000303	61-54-1	ko00380,ko01100,ko04080
Chenodeoxycholic-acid	Chenodeoxycholic acid	Bile acids	391.3	391.3	392.29266	Negative	[M-H]-	C24H40O4	N/A	N/A	N/A	N/A	N/A	N/A	N/A	N/A	N/A	N/A	N/A	N/A	N/A	N/A	N/A	N/A	N/A	N/A	N/A	N/A	C02528	HMDB0000518	474-25-9	ko00120,ko01100,ko04976
Xanthine	Xanthine	Imidazopyrimidines	153.04	110.03	152.033426	Positive	[M+H]+	C5H4N4O2	N/A	N/A	N/A	N/A	N/A	N/A	N/A	N/A	N/A	N/A	N/A	N/A	N/A	N/A	N/A	N/A	N/A	N/A	N/A	N/A	-	HMDB0000292	69-89-6	-
6-Methylthiopurine	6-Methylthiopurine	Imidazopyrimidines	167.04	167.04	166.031316	Positive	[M+H]+	C6H6N4S	N/A	N/A	N/A	N/A	N/A	N/A	N/A	N/A	N/A	N/A	N/A	N/A	N/A	N/A	N/A	N/A	N/A	N/A	N/A	N/A	-	HMDB0060412	50-66-8	-
2-indolecarboxylic-acid	2-indolecarboxylic acid	Indole and Its derivatives	162.1	144	161.047679	Positive	[M+H]+	C9H7NO2	N/A	N/A	N/A	N/A	N/A	N/A	N/A	N/A	N/A	N/A	N/A	N/A	N/A	N/A	N/A	N/A	N/A	N/A	N/A	N/A	-	HMDB0002285	1477-50-5	-
7,12-diketolithocholic-acid	7,12-diketolithocholic acid	Bile acids	403.3	403.3	404.256275	Negative	[M-H]-	C24H36O5	N/A	N/A	N/A	N/A	N/A	N/A	N/A	N/A	N/A	N/A	N/A	N/A	N/A	N/A	N/A	N/A	N/A	N/A	N/A	N/A	-	-	517-33-9	-
Pregnenolone	Pregnenolone	Hormones and hormone related compunds	299.2	299.2	316.24023	Positive	[M+H-H2O]+	C21H32O2	N/A	N/A	N/A	N/A	N/A	N/A	N/A	N/A	N/A	N/A	N/A	N/A	N/A	N/A	N/A	N/A	N/A	N/A	N/A	N/A	C01953	HMDB0000253	145-13-1	ko00140,ko01100,ko04913,ko04925,ko04927,ko04934
Dehydroepiandrsterone	Dehydroepiandrsterone	Hormones and hormone related compunds	367.1	97.1	368.165745	Negative	[M-H]-	C19H28O5S	N/A	N/A	N/A	N/A	N/A	N/A	N/A	N/A	N/A	N/A	N/A	N/A	N/A	N/A	N/A	N/A	N/A	N/A	N/A	N/A	C04555	HMDB0001032	651-48-9	ko00140,ko01100,ko04976
Tridecanoic-acid	Tridecanoic acid	FFA	213.19	213.18	214.19328	Negative	[M-H]-	C13H26O2	N/A	N/A	N/A	N/A	N/A	N/A	N/A	N/A	N/A	N/A	N/A	N/A	N/A	N/A	N/A	N/A	N/A	N/A	N/A	N/A	-	HMDB0000910	638-53-9	-
Dehydrocholic-acid	Dehydrocholic acid	Bile acids	401.23	401.23	402.240625	Negative	[M-H]-	C24H34O5	N/A	N/A	N/A	N/A	N/A	N/A	N/A	N/A	N/A	N/A	N/A	N/A	N/A	N/A	N/A	N/A	N/A	N/A	N/A	N/A	-	-	81-23-2	-
Lithocholic-acid	Lithocholic acid	Bile acids	375.3	375.3	376.297745	Negative	[M-H]-	C24H40O3	N/A	N/A	N/A	N/A	N/A	N/A	N/A	N/A	N/A	N/A	N/A	N/A	N/A	N/A	N/A	N/A	N/A	N/A	N/A	N/A	C03990	HMDB0000761	434-13-9	ko04976
Glycolithocholic-acid	Glycolithocholic acid	Bile acids	432.3	74	433.319209	Negative	[M-H]-	C26H43NO4	N/A	N/A	N/A	N/A	N/A	N/A	N/A	N/A	N/A	N/A	N/A	N/A	N/A	N/A	N/A	N/A	N/A	N/A	N/A	N/A	C15557	HMDB0000698	474-74-8	-
7-ketolithocholic-acid	7-ketolithocholic acid	Bile acids	389.3	389.3	390.27701	Negative	[M-H]-	C24H38O4	N/A	N/A	N/A	N/A	N/A	N/A	N/A	N/A	N/A	N/A	N/A	N/A	N/A	N/A	N/A	N/A	N/A	N/A	N/A	N/A	-	HMDB0000467	4651-67-6	-
11-Dodecenoic-acid	11-Dodecenoic acid	FFA	197.15	197.15	198.16198	Negative	[M-H]-	C12H22O2	N/A	N/A	N/A	N/A	N/A	N/A	N/A	N/A	N/A	N/A	N/A	N/A	N/A	N/A	N/A	N/A	N/A	N/A	N/A	N/A	-	HMDB0032248	65423-25-8	-
NOA	Nonanoic Acid	FFA	294.18122	137.0353	293.366	Positive	[M+H]+	C15H23N3O3	N/A	N/A	N/A	N/A	N/A	N/A	N/A	N/A	N/A	N/A	N/A	N/A	N/A	N/A	N/A	N/A	N/A	N/A	N/A	N/A	C01601	HMDB0000847	112-05-0	-
12-Tridecanoic-acid	12-Tridecanoic acid	FFA	211.17	211.17	212.17763	Negative	[M-H]-	C13H24O2	N/A	N/A	N/A	N/A	N/A	N/A	N/A	N/A	N/A	N/A	N/A	N/A	N/A	N/A	N/A	N/A	N/A	N/A	N/A	N/A	-	-	6006-06-0	-
OA	Octanoic Acid	FFA	280.16557	138.0416	279.15829	Positive	[M+H]+	C14H21N3O3	N/A	N/A	N/A	N/A	N/A	N/A	N/A	N/A	N/A	N/A	N/A	N/A	N/A	N/A	N/A	N/A	N/A	N/A	N/A	N/A	C06423	HMDB0000482	124-07-2	ko00061,ko00785,ko01100,ko01240
Undecenoic-acid	Undecenoic acid	FFA	183.14	183.14	184.14633	Negative	[M-H]-	C11H20O2	N/A	N/A	N/A	N/A	N/A	N/A	N/A	N/A	N/A	N/A	N/A	N/A	N/A	N/A	N/A	N/A	N/A	N/A	N/A	N/A	-	HMDB0033724	112-38-9	-
Linoelaidic-acid	Linoelaidic acid	FFA	279.23	279.23	280.24023	Negative	[M-H]-	C18H32O2	N/A	N/A	N/A	N/A	N/A	N/A	N/A	N/A	N/A	N/A	N/A	N/A	N/A	N/A	N/A	N/A	N/A	N/A	N/A	N/A	-	HMDB0006270	506-21-8	-
Heptanoyl-L-carnitine-chloride	Heptanoyl-L-carnitine chloride	CAR	274.20129	215.1273	273.194009	Positive	[M+H]+	C14H27NO4	N/A	N/A	N/A	N/A	N/A	N/A	N/A	N/A	N/A	N/A	N/A	N/A	N/A	N/A	N/A	N/A	N/A	N/A	N/A	N/A	-	-	162041-08-9	-
Malonylcarnitine	Malonylcarnitine	CAR	248.11286	85.0289	247.105589	Positive	[M+H]+	C10H17NO6	N/A	N/A	N/A	N/A	N/A	N/A	N/A	N/A	N/A	N/A	N/A	N/A	N/A	N/A	N/A	N/A	N/A	N/A	N/A	N/A	-	HMDB0002095	853728-01-5	-
Pyridoxamine-dichlorohydrate	Pyridoxamine dichlorohydrate	CoEnzyme and vitamins	169.09	134.06	241.11	Positive	[M+H]+	C8H14Cl2N2O2	N/A	N/A	N/A	N/A	N/A	N/A	N/A	N/A	N/A	N/A	N/A	N/A	N/A	N/A	N/A	N/A	N/A	N/A	N/A	N/A	-	-	524-36-7	-
Triphosphopyridine-nucleotide	Triphosphopyridine nucleotide	CoEnzyme and vitamins	742.068	620	743.075459	Negative	[M-H]-	C21H28N7O17P3	N/A	N/A	N/A	N/A	N/A	N/A	N/A	N/A	N/A	N/A	N/A	N/A	N/A	N/A	N/A	N/A	N/A	N/A	N/A	N/A	C00006	-	53-59-8	ko00480,ko00760,ko00983,ko01100,ko01240,ko04918,ko04925,ko04936,ko05208,ko05415
Nadide	Nadide	CoEnzyme and vitamins	662.2	539.9	663.109127	Negative	[M-H]-	C21H27N7O14P2	N/A	N/A	N/A	N/A	N/A	N/A	N/A	N/A	N/A	N/A	N/A	N/A	N/A	N/A	N/A	N/A	N/A	N/A	N/A	N/A	C00003	HMDB0000902	53-84-9	ko00190,ko00730,ko00760,ko00983,ko01100,ko01240,ko04148,ko04152,ko04211,ko04925,ko04936,ko04977,ko05208
Glycodehydrocholic-acid	Glycodehydrocholic acid	Bile acids	458.3	73.9	459.262089	Negative	[M-H]-	C26H37NO6	N/A	N/A	N/A	N/A	N/A	N/A	N/A	N/A	N/A	N/A	N/A	N/A	N/A	N/A	N/A	N/A	N/A	N/A	N/A	N/A	-	-	3415-45-0	-
Isoallolithocholic-acid	Isoallolithocholic acid	Bile acids	375.3	375.3	376.297745	Negative	[M-H]-	C24H40O3	N/A	N/A	N/A	N/A	N/A	N/A	N/A	N/A	N/A	N/A	N/A	N/A	N/A	N/A	N/A	N/A	N/A	N/A	N/A	N/A	-	HMDB0000713	2276-93-9	-
10(E)-Pentadecenoic-Acid	10(E)-Pentadecenoic Acid	FFA	239.2	239.2	240.20893	Negative	[M-H]-	C15H28O2	N/A	N/A	N/A	N/A	N/A	N/A	N/A	N/A	N/A	N/A	N/A	N/A	N/A	N/A	N/A	N/A	N/A	N/A	N/A	N/A	-	-	321744-58-5	-
HA	Heptanoic Acid	FFA	266.14992	138.0417	265.14264	Positive	[M+H]+	C13H19N3O3	N/A	N/A	N/A	N/A	N/A	N/A	N/A	N/A	N/A	N/A	N/A	N/A	N/A	N/A	N/A	N/A	N/A	N/A	N/A	N/A	C17714	HMDB0000666	111-14-8	-
Dihydrotestosterone	Dihydrotestosterone	Hormones and hormone related compunds	291.3	255.2	290.22458	Positive	[M+H]+	C19H30O2	N/A	N/A	N/A	N/A	N/A	N/A	N/A	N/A	N/A	N/A	N/A	N/A	N/A	N/A	N/A	N/A	N/A	N/A	N/A	N/A	C03917	HMDB0002961	521-18-6	ko00140,ko01100,ko05200,ko05215
6-hydroxy-melatonin	6-hydroxy melatonin	Hormones and hormone related compunds	247.1	160.1	248.116093	Negative	[M-H]-	C13H16N2O3	N/A	N/A	N/A	N/A	N/A	N/A	N/A	N/A	N/A	N/A	N/A	N/A	N/A	N/A	N/A	N/A	N/A	N/A	N/A	N/A	C05643	HMDB0004081	2208-41-5	ko00380
Melatonin	Melatonin	Hormones and hormone related compunds	233.129003	174.2	232.121178	Positive	[M+H]+	C13H16N2O2	N/A	N/A	N/A	N/A	N/A	N/A	N/A	N/A	N/A	N/A	N/A	N/A	N/A	N/A	N/A	N/A	N/A	N/A	N/A	N/A	C01598	HMDB0001389	73-31-4	ko00380,ko01100,ko04080,ko04713
3beta-Cholic-Acid	3beta-Cholic Acid	Bile acids	407.4	407.4	408.287575	Negative	[M-H]-	C24H40O5	N/A	N/A	N/A	N/A	N/A	N/A	N/A	N/A	N/A	N/A	N/A	N/A	N/A	N/A	N/A	N/A	N/A	N/A	N/A	N/A	-	HMDB0000419	3338-16-7	-
17beta-Estradiol	17beta-Estradiol	Hormones and hormone related compunds	255.3	255.3	272.17763	Positive	[M+H-H2O]+	C18H24O2	N/A	N/A	N/A	N/A	N/A	N/A	N/A	N/A	N/A	N/A	N/A	N/A	N/A	N/A	N/A	N/A	N/A	N/A	N/A	N/A	C00951	HMDB0000151	50-28-2	ko00140,ko01100,ko01522,ko04714,ko04913,ko04915,ko04917,ko04929,ko04961,ko05200,ko05207,ko05208,ko05215,ko05224
Cortisol	Cortisol	Hormones and hormone related compunds	363.2	345	362.209325	Positive	[M+H]+	C21H30O5	N/A	N/A	N/A	N/A	N/A	N/A	N/A	N/A	N/A	N/A	N/A	N/A	N/A	N/A	N/A	N/A	N/A	N/A	N/A	N/A	C00735	HMDB0000063	50-23-7	ko00140,ko01100,ko04080,ko04927,ko04934,ko04960,ko04976,ko05200,ko05215
Androsterone	Androsterone	Hormones and hormone related compunds	273.22458	273.22458	290.22458	Positive	[M+H-H2O]+	C19H30O2	N/A	N/A	N/A	N/A	N/A	N/A	N/A	N/A	N/A	N/A	N/A	N/A	N/A	N/A	N/A	N/A	N/A	N/A	N/A	N/A	C00523	HMDB0000031	53-41-8	ko00140,ko01100
Lithocholic-acid-3-sulfate	Lithocholic acid-3-sulfate	Bile acids	455.25	96.96	456.25456	Negative	[M-H]-	C24H40O6S	N/A	N/A	N/A	N/A	N/A	N/A	N/A	N/A	N/A	N/A	N/A	N/A	N/A	N/A	N/A	N/A	N/A	N/A	N/A	N/A	-	HMDB0000907	34669-57-3	-
PYRROLE-2-CARBOXYLIC-ACID	PYRROLE-2-CARBOXYLIC ACID	Heterocyclic compounds	112.0393	68	111.032029	Positive	[M+H]+	C5H5NO2	N/A	N/A	N/A	N/A	N/A	N/A	N/A	N/A	N/A	N/A	N/A	N/A	N/A	N/A	N/A	N/A	N/A	N/A	N/A	N/A	C05942	HMDB0004230	634-97-9	ko00470
Isodeoxycholic-acid	Isodeoxycholic acid	Bile acids	391.3	391.3	392.29266	Negative	[M-H]-	C24H40O4	N/A	N/A	N/A	N/A	N/A	N/A	N/A	N/A	N/A	N/A	N/A	N/A	N/A	N/A	N/A	N/A	N/A	N/A	N/A	N/A	C17661	HMDB0002536	566-17-6	-
Hexadecanamide	Hexadecanamide	Fatty amides	256.3	88.2	255.256214	Positive	[M+H]+	C16H33NO	N/A	N/A	N/A	N/A	N/A	N/A	N/A	N/A	N/A	N/A	N/A	N/A	N/A	N/A	N/A	N/A	N/A	N/A	N/A	N/A	-	HMDB0012273	629-54-9	-
Taurolithocholic-acid	Taurolithocholic acid	Bile acids	482.3	482.3	483.301844	Negative	[M-H]-	C26H45NO5S	N/A	N/A	N/A	N/A	N/A	N/A	N/A	N/A	N/A	N/A	N/A	N/A	N/A	N/A	N/A	N/A	N/A	N/A	N/A	N/A	C02592	HMDB0000722	516-90-5	-
Chenodeoxycholic-acid-24-acyl-beta-d-glucuronide	Chenodeoxycholic acid 24-acyl-beta-d-glucuronide	Bile acids	567.3	567.3	568.32475	Negative	[M-H]-	C30H48O10	N/A	N/A	N/A	N/A	N/A	N/A	N/A	N/A	N/A	N/A	N/A	N/A	N/A	N/A	N/A	N/A	N/A	N/A	N/A	N/A	-	-	208038-27-1	-
βGCA	3β-Glycocholic Acid	Bile acids	464.30176	464.3	465.309039	Negative	[M-H]-	C26H43NO6	N/A	N/A	N/A	N/A	N/A	N/A	N/A	N/A	N/A	N/A	N/A	N/A	N/A	N/A	N/A	N/A	N/A	N/A	N/A	N/A	-	-	107589-98-0	-
Glycohyocholic-acid	Glycohyocholic acid	Bile acids	464.3	464.3	465.309039	Negative	[M-H]-	C26H43NO6	N/A	N/A	N/A	N/A	N/A	N/A	N/A	N/A	N/A	N/A	N/A	N/A	N/A	N/A	N/A	N/A	N/A	N/A	N/A	N/A	-	HMDB0240607	32747-08-3	-
Dehydrolithocholic-acid	Dehydrolithocholic acid	Bile acids	373.3	373.3	374.282095	Negative	[M-H]-	C24H38O3	N/A	N/A	N/A	N/A	N/A	N/A	N/A	N/A	N/A	N/A	N/A	N/A	N/A	N/A	N/A	N/A	N/A	N/A	N/A	N/A	-	-	1553-56-6	-
βHDCA	β-Hyodeoxycholic Acid	Bile acids	391.28538	391.28	392.29266	Negative	[M-H]-	C24H40O4	N/A	N/A	N/A	N/A	N/A	N/A	N/A	N/A	N/A	N/A	N/A	N/A	N/A	N/A	N/A	N/A	N/A	N/A	N/A	N/A	-	HMDB0000361	570-84-3	-
Abrine	Abrine	Indole and Its derivatives	219.11	188.07	218.105528	Positive	[M+H]+	C12H14N2O2	N/A	N/A	N/A	N/A	N/A	N/A	N/A	N/A	N/A	N/A	N/A	N/A	N/A	N/A	N/A	N/A	N/A	N/A	N/A	N/A	-	-	526-31-8	-
Methylparaben	Methylparaben	Benzene and substituted derivatives	151.04	92.03	152.047345	Negative	[M-H]-	C8H8O3	N/A	N/A	N/A	N/A	N/A	N/A	N/A	N/A	N/A	N/A	N/A	N/A	N/A	N/A	N/A	N/A	N/A	N/A	N/A	N/A	-	HMDB0032572	99-76-3	-
2-Phenylpropionic-acid	2-Phenylpropionic acid	Benzene and substituted derivatives	151.08	105.07	150.06808	Positive	[M+H]+	C9H10O2	N/A	N/A	N/A	N/A	N/A	N/A	N/A	N/A	N/A	N/A	N/A	N/A	N/A	N/A	N/A	N/A	N/A	N/A	N/A	N/A	-	HMDB0011743	492-37-5	-
2-(Formylamino)Benzoic-Acid	2-(Formylamino)Benzoic Acid	Benzene and substituted derivatives	166.04	120	165.042594	Positive	[M+H]+	C8H7NO3	N/A	N/A	N/A	N/A	N/A	N/A	N/A	N/A	N/A	N/A	N/A	N/A	N/A	N/A	N/A	N/A	N/A	N/A	N/A	N/A	C05653	HMDB0004089	3342-77-6	ko00380,ko01100
Tartaric-acid	Tartaric acid	Organic acid And Its derivatives	149.00916	87.0092	150.01644	Negative	[M-H]-	C4H6O6	N/A	N/A	N/A	N/A	N/A	N/A	N/A	N/A	N/A	N/A	N/A	N/A	N/A	N/A	N/A	N/A	N/A	N/A	N/A	N/A	-	HMDB0000956	526-83-0	-
Levulinic-acid	Levulinic acid	Organic acid And Its derivatives	115	71.1	116.047345	Negative	[M-H]-	C5H8O3	N/A	N/A	N/A	N/A	N/A	N/A	N/A	N/A	N/A	N/A	N/A	N/A	N/A	N/A	N/A	N/A	N/A	N/A	N/A	N/A	-	HMDB0000720	123-76-2	-
Itaconic-acid	Itaconic acid	Organic acid And Its derivatives	129.02	85.03	130.02661	Negative	[M-H]-	C5H6O4	N/A	N/A	N/A	N/A	N/A	N/A	N/A	N/A	N/A	N/A	N/A	N/A	N/A	N/A	N/A	N/A	N/A	N/A	N/A	N/A	-	HMDB0002092	97-65-4	-
dUMP	dUMP	Nucleotide metabolomics	307	195	308.1819	Negative	[M-H]-	C9H13N2O8P	N/A	N/A	N/A	N/A	N/A	N/A	N/A	N/A	N/A	N/A	N/A	N/A	N/A	N/A	N/A	N/A	N/A	N/A	N/A	N/A	C00365	HMDB0001409	964-26-1	ko00240,ko01100,ko01232,ko01523
Ubenimex	Ubenimex	Amino acid derivatives	309.18088	120.0815	308.173608	Positive	[M+H]+	C16H24N2O4	N/A	N/A	N/A	N/A	N/A	N/A	N/A	N/A	N/A	N/A	N/A	N/A	N/A	N/A	N/A	N/A	N/A	N/A	N/A	N/A	-	-	58970-76-6	-
Methanandamide	Methanandamide	Amino acid derivatives	362.30536	76.0762	361.298079	Positive	[M+H]+	C23H39NO2	N/A	N/A	N/A	N/A	N/A	N/A	N/A	N/A	N/A	N/A	N/A	N/A	N/A	N/A	N/A	N/A	N/A	N/A	N/A	N/A	-	-	157182-49-5	-
Nicotinyl-Methylamide	Nicotinyl Methylamide	CoEnzyme and vitamins	137.07	108.04	136.063663	Positive	[M+H]+	C7H8N2O	N/A	N/A	N/A	N/A	N/A	N/A	N/A	N/A	N/A	N/A	N/A	N/A	N/A	N/A	N/A	N/A	N/A	N/A	N/A	N/A	-	HMDB0003152	114-33-0	-
Dihydrofolic-acid	Dihydrofolic acid	Organic acid And Its derivatives	442.15	442.15	443.155333	Negative	[M-H]-	C19H21N7O6	N/A	N/A	N/A	N/A	N/A	N/A	N/A	N/A	N/A	N/A	N/A	N/A	N/A	N/A	N/A	N/A	N/A	N/A	N/A	N/A	-	HMDB0001056	4033-27-6	-
3,5-Dinitro-L-tyrosine	3,5-Dinitro-L-tyrosine	Amino acid derivatives	272.05133	226.0472	271.044052	Positive	[M+H]+	C9H9N3O7	N/A	N/A	N/A	N/A	N/A	N/A	N/A	N/A	N/A	N/A	N/A	N/A	N/A	N/A	N/A	N/A	N/A	N/A	N/A	N/A	-	-	17360-11-1	-
Homoserine	Homoserine	Amino acids	120.065	74.06	119.058244	Positive	[M+H]+	C4H9NO3	N/A	N/A	N/A	N/A	N/A	N/A	N/A	N/A	N/A	N/A	N/A	N/A	N/A	N/A	N/A	N/A	N/A	N/A	N/A	N/A	-	HMDB0000719	1927-25-9	-
dTMP	dTMP	Nucleotide and Its metabolomics	321.1	195.2	322.208	Negative	[M-H]-	C10H15N2O8P	N/A	N/A	N/A	N/A	N/A	N/A	N/A	N/A	N/A	N/A	N/A	N/A	N/A	N/A	N/A	N/A	N/A	N/A	N/A	N/A	-	HMDB0001227	33430-62-5	-
Sarcosine	Sarcosine	Amino acids	90.2	44.1	89.047679	Positive	[M+H]+	C3H7NO2	N/A	N/A	N/A	N/A	N/A	N/A	N/A	N/A	N/A	N/A	N/A	N/A	N/A	N/A	N/A	N/A	N/A	N/A	N/A	N/A	C00213	HMDB0000271	107-97-1	ko00260,ko00330,ko01100
L-Theanine	L-Theanine	Amino acids	175.11	84.04	174.100443	Positive	[M+H]+	C7H14N2O3	N/A	N/A	N/A	N/A	N/A	N/A	N/A	N/A	N/A	N/A	N/A	N/A	N/A	N/A	N/A	N/A	N/A	N/A	N/A	N/A	-	HMDB0034365	3081-61-6	-
5-hydroxymethylcytidine	5-hydroxymethylcytidine	Nucleotide and Its metabolomics	274.1	142.1	273.096087	Positive	[M+H]+	C10H15N3O6	N/A	N/A	N/A	N/A	N/A	N/A	N/A	N/A	N/A	N/A	N/A	N/A	N/A	N/A	N/A	N/A	N/A	N/A	N/A	N/A	C03997	-	19235-17-7	ko00240
Imidazole-Propionate	Imidazole Propionate	Azoles	141.07	81.05	140.058578	Positive	[M+H]+	C6H8N2O2	N/A	N/A	N/A	N/A	N/A	N/A	N/A	N/A	N/A	N/A	N/A	N/A	N/A	N/A	N/A	N/A	N/A	N/A	N/A	N/A	-	HMDB0002271	1074-59-5	-
2-Amino-3-methoxybenzoic-acid	2-Amino-3-methoxybenzoic acid	Benzene and substituted derivatives	166	107	167.058244	Negative	[M-H]-	C8H9NO3	N/A	N/A	N/A	N/A	N/A	N/A	N/A	N/A	N/A	N/A	N/A	N/A	N/A	N/A	N/A	N/A	N/A	N/A	N/A	N/A	C05831	HMDB0060374	3177-80-8	ko00380
5-hydroxymethyluridine	5-hydroxymethyluridine	Nucleotide and Its metabolomics	273.07282	140.0358	274.080103	Negative	[M-H]-	C10H14N2O7	N/A	N/A	N/A	N/A	N/A	N/A	N/A	N/A	N/A	N/A	N/A	N/A	N/A	N/A	N/A	N/A	N/A	N/A	N/A	N/A	-	-	30414-00-7	-
L-tyrosine-methyl-ester	L-tyrosine methyl ester	Amino acid derivatives	196.2	136.3	195.089544	Positive	[M+H]+	C10H13NO3	N/A	N/A	N/A	N/A	N/A	N/A	N/A	N/A	N/A	N/A	N/A	N/A	N/A	N/A	N/A	N/A	N/A	N/A	N/A	N/A	C03404	HMDB0029217	1080-06-4	-
Carglumic-acid	Carglumic acid	Amino acid derivatives	189.05169	102.0564	190.058973	Negative	[M-H]-	C6H10N2O5	N/A	N/A	N/A	N/A	N/A	N/A	N/A	N/A	N/A	N/A	N/A	N/A	N/A	N/A	N/A	N/A	N/A	N/A	N/A	N/A	-	HMDB0015673	1188-38-1	-
Cinnamic-Acid	Cinnamic Acid	Organic acid And Its derivatives	147.044605	103	148.05243	Negative	[M-H]-	C9H8O2	N/A	N/A	N/A	N/A	N/A	N/A	N/A	N/A	N/A	N/A	N/A	N/A	N/A	N/A	N/A	N/A	N/A	N/A	N/A	N/A	-	HMDB0000930	621-82-9	-
N-Acetyl-L-tryptophanamide	N-Acetyl-L-tryptophanamide	Amino acid derivatives	244.10915	115.0519	245.116427	Negative	[M-H]-	C13H15N3O2	N/A	N/A	N/A	N/A	N/A	N/A	N/A	N/A	N/A	N/A	N/A	N/A	N/A	N/A	N/A	N/A	N/A	N/A	N/A	N/A	-	-	2382-79-8	-
3-Methoxytyrosine	3-Methoxytyrosine	Amino acid derivatives	210.08	135.05	211.084459	Negative	[M-H]-	C10H13NO4	N/A	N/A	N/A	N/A	N/A	N/A	N/A	N/A	N/A	N/A	N/A	N/A	N/A	N/A	N/A	N/A	N/A	N/A	N/A	N/A	-	HMDB0001434	7636-26-2	-
Caffeicacid	Caffeicacid	Organic acid And Its derivatives	179	135.1	180.04226	Negative	[M-H]-	C9H8O4	N/A	N/A	N/A	N/A	N/A	N/A	N/A	N/A	N/A	N/A	N/A	N/A	N/A	N/A	N/A	N/A	N/A	N/A	N/A	N/A	C01481	HMDB0001964	331-39-5	-
2-Hydroxycinnamic-acid	2-Hydroxycinnamic acid	Organic acid And Its derivatives	165.05	103.05	164.047345	Positive	[M+H]+	C9H8O3	N/A	N/A	N/A	N/A	N/A	N/A	N/A	N/A	N/A	N/A	N/A	N/A	N/A	N/A	N/A	N/A	N/A	N/A	N/A	N/A	-	HMDB0002641	614-60-8	-
cis-4-Hydroxy-L-proline	cis-4-Hydroxy-L-proline	Amino acid derivatives	132.06552	86.06	131.058244	Positive	[M+H]+	C5H9NO3	N/A	N/A	N/A	N/A	N/A	N/A	N/A	N/A	N/A	N/A	N/A	N/A	N/A	N/A	N/A	N/A	N/A	N/A	N/A	N/A	-	HMDB0240251	618-27-9	-
Iminodiacetic-acid	Iminodiacetic acid	Organic acid And Its derivatives	134.04478	88.0396	133.037509	Positive	[M+H]+	C4H7NO4	N/A	N/A	N/A	N/A	N/A	N/A	N/A	N/A	N/A	N/A	N/A	N/A	N/A	N/A	N/A	N/A	N/A	N/A	N/A	N/A	-	HMDB0011753	142-73-4	-
Sumiki's-acid	Sumiki's acid	Organic acid And Its derivatives	140.8	97.2	142.02661	Negative	[M-H]-	C6H6O4	N/A	N/A	N/A	N/A	N/A	N/A	N/A	N/A	N/A	N/A	N/A	N/A	N/A	N/A	N/A	N/A	N/A	N/A	N/A	N/A	C20448	HMDB0002432	6338-41-6	-
Chorismate	Chorismate	Organic acid And Its derivatives	207.03	137.02	226.04774	Negative	-	C10H10O6	N/A	N/A	N/A	N/A	N/A	N/A	N/A	N/A	N/A	N/A	N/A	N/A	N/A	N/A	N/A	N/A	N/A	N/A	N/A	N/A	-	HMDB0012199	617-12-9	-
Albizziin	Albizziin	Amino acid derivatives	148.07167	88.04	147.064392	Positive	[M+H]+	C4H9N3O3	N/A	N/A	N/A	N/A	N/A	N/A	N/A	N/A	N/A	N/A	N/A	N/A	N/A	N/A	N/A	N/A	N/A	N/A	N/A	N/A	-	-	1483-07-4	-
2-Methylvaleric-acid	2-Methylvaleric acid	Organic acid And Its derivatives	117.09	117.09	116.08373	Positive	[M+H]+	C6H12O2	N/A	N/A	N/A	N/A	N/A	N/A	N/A	N/A	N/A	N/A	N/A	N/A	N/A	N/A	N/A	N/A	N/A	N/A	N/A	N/A	-	HMDB0031580	22160-39-0	-
Ethyl-N-acetyl-L-tyrosinate	Ethyl N-acetyl-L-tyrosinate	Amino acid derivatives	252.12303	136.0758	251.115759	Positive	[M+H]+	C13H17NO4	N/A	N/A	N/A	N/A	N/A	N/A	N/A	N/A	N/A	N/A	N/A	N/A	N/A	N/A	N/A	N/A	N/A	N/A	N/A	N/A	-	-	840-97-1	-
Selenomethionine	Selenomethionine	Amino acid derivatives	198	108.95	196.12	Positive	[M+H]+	C5H11NO2Se	N/A	N/A	N/A	N/A	N/A	N/A	N/A	N/A	N/A	N/A	N/A	N/A	N/A	N/A	N/A	N/A	N/A	N/A	N/A	N/A	-	HMDB0003966	3211-76-5	-
Citramalic-acid	Citramalic acid	Organic acid And Its derivatives	147.03	87.01	148.037175	Negative	[M-H]-	C5H8O5	N/A	N/A	N/A	N/A	N/A	N/A	N/A	N/A	N/A	N/A	N/A	N/A	N/A	N/A	N/A	N/A	N/A	N/A	N/A	N/A	-	HMDB0000426	2306-22-1	-
Acetoacetic-acid-sodium-salt	Acetoacetic acid sodium salt	Organic acid And Its derivatives	102.12	59.11	124.07	Positive	[M-Na+2H]+	C4H5NaO3	N/A	N/A	N/A	N/A	N/A	N/A	N/A	N/A	N/A	N/A	N/A	N/A	N/A	N/A	N/A	N/A	N/A	N/A	N/A	N/A	C00164	HMDB0000060	623-58-5	ko00280,ko00310,ko00350,ko00650,ko01100
2-hydroxy-2-methylbutyric-acid	2-hydroxy-2-methylbutyric acid	Organic acid And Its derivatives	117.1	71.1	118.062995	Negative	[M-H]-	C5H10O3	N/A	N/A	N/A	N/A	N/A	N/A	N/A	N/A	N/A	N/A	N/A	N/A	N/A	N/A	N/A	N/A	N/A	N/A	N/A	N/A	-	HMDB0001987	3739-30-8	-
Ureidosuccinic-acid	Ureidosuccinic acid	Amino acid derivatives	177.0506	134	176.043323	Positive	[M+H]+	C5H8N2O5	N/A	N/A	N/A	N/A	N/A	N/A	N/A	N/A	N/A	N/A	N/A	N/A	N/A	N/A	N/A	N/A	N/A	N/A	N/A	N/A	C00438	HMDB0000828	923-37-5	ko00240,ko00250,ko01100,ko01240
5-Hydroxy-Tryptophan	5-Hydroxy-Tryptophan	Amino acid derivatives	221.092618	204.1	220.084793	Positive	[M+H]+	C11H12N2O3	N/A	N/A	N/A	N/A	N/A	N/A	N/A	N/A	N/A	N/A	N/A	N/A	N/A	N/A	N/A	N/A	N/A	N/A	N/A	N/A	C00643	HMDB0000472	4350-09-8	ko00380,ko01100,ko04726
Aniline-2-sulfonate	Aniline-2-sulfonate	Benzene and substituted derivatives	172.01	79.96	173.014664	Negative	[M-H]-	C6H7NO3S	N/A	N/A	N/A	N/A	N/A	N/A	N/A	N/A	N/A	N/A	N/A	N/A	N/A	N/A	N/A	N/A	N/A	N/A	N/A	N/A	-	-	88-21-1	-
3-Iodo-L-Tyrosine	3-Iodo-L-Tyrosine	Amino acid derivatives	308.2	261.97	306.970549	Positive	[M+H]+	C9H10INO3	N/A	N/A	N/A	N/A	N/A	N/A	N/A	N/A	N/A	N/A	N/A	N/A	N/A	N/A	N/A	N/A	N/A	N/A	N/A	N/A	C02515	HMDB0000021	70-78-0	ko00350,ko01100,ko04918
Adenine	Adenine	Nucleotide and Its metabolomics	134	107	135.054495	Negative	[M-H]-	C5H5N5	N/A	N/A	N/A	N/A	N/A	N/A	N/A	N/A	N/A	N/A	N/A	N/A	N/A	N/A	N/A	N/A	N/A	N/A	N/A	N/A	C00147	HMDB0000034	73-24-5	ko00230,ko01100,ko01232
4-Hydroxy-3-methylbenzoic-acid	4-Hydroxy-3-methylbenzoic acid	Benzene and substituted derivatives	151	107	152.047345	Negative	[M-H]-	C8H8O3	N/A	N/A	N/A	N/A	N/A	N/A	N/A	N/A	N/A	N/A	N/A	N/A	N/A	N/A	N/A	N/A	N/A	N/A	N/A	N/A	-	HMDB0004815	499-76-3	-
1,7-dimethyluric-acid	1,7-dimethyluric acid	Nucleotide and Its metabolomics	195	180	196.059641	Negative	[M-H]-	C7H8N4O3	N/A	N/A	N/A	N/A	N/A	N/A	N/A	N/A	N/A	N/A	N/A	N/A	N/A	N/A	N/A	N/A	N/A	N/A	N/A	N/A	C16356	HMDB0011103	33868-03-0	ko00232,ko01100
4-Methoxysalicylic-Acid	4-Methoxysalicylic Acid	Benzene and substituted derivatives	169.05	151.04	168.04226	Positive	[M+H]+	C8H8O4	N/A	N/A	N/A	N/A	N/A	N/A	N/A	N/A	N/A	N/A	N/A	N/A	N/A	N/A	N/A	N/A	N/A	N/A	N/A	N/A	-	-	2237-36-7	-
2,5-Dihydroxy-Benzoic-Acid	2,5-Dihydroxy Benzoic Acid	Benzene and substituted derivatives	153.0188087	109	154.02661	Negative	[M-H]-	C7H6O4	N/A	N/A	N/A	N/A	N/A	N/A	N/A	N/A	N/A	N/A	N/A	N/A	N/A	N/A	N/A	N/A	N/A	N/A	N/A	N/A	C00628	HMDB0000152	490-79-9	ko00350,ko01100
5-Methyluridine	5-Methyluridine	Nucleotide and Its metabolomics	257.08	166.96	258.085188	Negative	[M-H]-	C10H14N2O6	N/A	N/A	N/A	N/A	N/A	N/A	N/A	N/A	N/A	N/A	N/A	N/A	N/A	N/A	N/A	N/A	N/A	N/A	N/A	N/A	-	HMDB0000884	1463-10-1	-
7-methylxanthine	7-methylxanthine	Nucleotide and Its metabolomics	167	124	166.049076	Positive	[M+H]+	C6H6N4O2	N/A	N/A	N/A	N/A	N/A	N/A	N/A	N/A	N/A	N/A	N/A	N/A	N/A	N/A	N/A	N/A	N/A	N/A	N/A	N/A	C16353	HMDB0001991	552-62-5	ko00232,ko01100
2-Pyrocatechuic-acid	2-Pyrocatechuic acid	Benzene and substituted derivatives	153.02	108.02	154.02661	Negative	[M-H]-	C7H6O4	N/A	N/A	N/A	N/A	N/A	N/A	N/A	N/A	N/A	N/A	N/A	N/A	N/A	N/A	N/A	N/A	N/A	N/A	N/A	N/A	-	HMDB0000397	303-38-8	-
4-Hydroxybenzaldehyde	4-Hydroxybenzaldehyde	Benzene and substituted derivatives	123.04	95	122.03678	Positive	[M+H]+	C7H6O2	N/A	N/A	N/A	N/A	N/A	N/A	N/A	N/A	N/A	N/A	N/A	N/A	N/A	N/A	N/A	N/A	N/A	N/A	N/A	N/A	C00633	HMDB0011718	123-08-0	ko01100
Paraxanthine	Paraxanthine	Nucleotide and Its metabolomics	181.1	124.2	180.064726	Positive	[M+H]+	C7H8N4O2	N/A	N/A	N/A	N/A	N/A	N/A	N/A	N/A	N/A	N/A	N/A	N/A	N/A	N/A	N/A	N/A	N/A	N/A	N/A	N/A	C13747	HMDB0001860	611-59-6	ko00232,ko01100
N4-acetyl-2'-O-methylcytidine	N4-acetyl-2'-O-methylcytidine	Nucleotide and Its metabolomics	300.1	154.1	299.111737	Positive	[M+H]+	C12H17N3O6	N/A	N/A	N/A	N/A	N/A	N/A	N/A	N/A	N/A	N/A	N/A	N/A	N/A	N/A	N/A	N/A	N/A	N/A	N/A	N/A	-	-	113886-71-8	-
Tyramine	Tyramine	Benzene and substituted derivatives	138.091889	121.1	137.084064	Positive	[M+H]+	C8H11NO	N/A	N/A	N/A	N/A	N/A	N/A	N/A	N/A	N/A	N/A	N/A	N/A	N/A	N/A	N/A	N/A	N/A	N/A	N/A	N/A	C00483	HMDB0000306	51-67-2	ko00350,ko01100,ko01240,ko04080,ko04974
1-Hydroxy-2-naphthoate	1-Hydroxy-2-naphthoate	Naphthalenes	189.05	115.05	188.047345	Positive	[M+H]+	C11H8O3	N/A	N/A	N/A	N/A	N/A	N/A	N/A	N/A	N/A	N/A	N/A	N/A	N/A	N/A	N/A	N/A	N/A	N/A	N/A	N/A	-	-	86-48-6	-
2-Methoxybenzoic-acid	2-Methoxybenzoic acid	Benzene and substituted derivatives	153.1	135.2	152.047345	Positive	[M+H]+	C8H8O3	N/A	N/A	N/A	N/A	N/A	N/A	N/A	N/A	N/A	N/A	N/A	N/A	N/A	N/A	N/A	N/A	N/A	N/A	N/A	N/A	-	HMDB0032604	579-75-9	-
Homogentisic-Acid	Homogentisic Acid	Benzene and substituted derivatives	167.034435	123.1	168.04226	Negative	[M-H]-	C8H8O4	N/A	N/A	N/A	N/A	N/A	N/A	N/A	N/A	N/A	N/A	N/A	N/A	N/A	N/A	N/A	N/A	N/A	N/A	N/A	N/A	C00544	HMDB0000130	451-13-8	ko00130,ko00350,ko01100,ko01240
Diphenylamine	Diphenylamine	Benzene and substituted derivatives	170.1	92.3	169.089149	Positive	[M+H]+	C12H11N	N/A	N/A	N/A	N/A	N/A	N/A	N/A	N/A	N/A	N/A	N/A	N/A	N/A	N/A	N/A	N/A	N/A	N/A	N/A	N/A	C11016	HMDB0032562	122-39-4	-
3-Hydroxybenzaldehyde	3-Hydroxybenzaldehyde	Benzene and substituted derivatives	123.04	77.04	122.03678	Positive	[M+H]+	C7H6O2	N/A	N/A	N/A	N/A	N/A	N/A	N/A	N/A	N/A	N/A	N/A	N/A	N/A	N/A	N/A	N/A	N/A	N/A	N/A	N/A	-	-	100-83-4	-
3-Methylsalicylic-acid	3-Methylsalicylic acid	Benzene and substituted derivatives	151.0395441	107.1	152.047345	Negative	[M-H]-	C8H8O3	N/A	N/A	N/A	N/A	N/A	N/A	N/A	N/A	N/A	N/A	N/A	N/A	N/A	N/A	N/A	N/A	N/A	N/A	N/A	N/A	C14088	HMDB0002390	83-40-9	-
Dihydrothymine	Dihydrothymine	Nucleotide and Its metabolomics	129.0659	86	128.058578	Positive	[M+H]+	C5H8N2O2	N/A	N/A	N/A	N/A	N/A	N/A	N/A	N/A	N/A	N/A	N/A	N/A	N/A	N/A	N/A	N/A	N/A	N/A	N/A	N/A	C00906	HMDB0000079	696-04-8	-
9H-purine	9H-purine	Nucleotide and Its metabolomics	121.05	94.04	120.043596	Positive	[M+H]+	C5H4N4	N/A	N/A	N/A	N/A	N/A	N/A	N/A	N/A	N/A	N/A	N/A	N/A	N/A	N/A	N/A	N/A	N/A	N/A	N/A	N/A	C15587	HMDB0001366	120-73-0	-
4-Methoxybenzaldehyde	4-Methoxybenzaldehyde	Benzene and substituted derivatives	136.9	77	136.05243	Positive	[M+H]+	C8H8O2	N/A	N/A	N/A	N/A	N/A	N/A	N/A	N/A	N/A	N/A	N/A	N/A	N/A	N/A	N/A	N/A	N/A	N/A	N/A	N/A	C10761	HMDB0029686	123-11-5	-
Thymine	Thymine	Nucleotide and Its metabolomics	127.05	84.044	126.042928	Positive	[M+H]+	C5H6N2O2	N/A	N/A	N/A	N/A	N/A	N/A	N/A	N/A	N/A	N/A	N/A	N/A	N/A	N/A	N/A	N/A	N/A	N/A	N/A	N/A	C00178	HMDB0000262	65-71-4	ko00240,ko01100,ko01232
5-Hydroxymethyluracil	5-Hydroxymethyluracil	Nucleotide and Its metabolomics	141.0300421	123	142.037843	Negative	[M-H]-	C5H6N2O3	N/A	N/A	N/A	N/A	N/A	N/A	N/A	N/A	N/A	N/A	N/A	N/A	N/A	N/A	N/A	N/A	N/A	N/A	N/A	N/A	C03088	HMDB0000469	4433-40-3	-
N6-acetyladenosine	N6-acetyladenosine	Nucleotide and Its metabolomics	310.11	178.07	309.10732	Positive	[M+H]+	C12H15N5O5	N/A	N/A	N/A	N/A	N/A	N/A	N/A	N/A	N/A	N/A	N/A	N/A	N/A	N/A	N/A	N/A	N/A	N/A	N/A	N/A	-	-	16265-37-5	-
Oxypurinol	Oxypurinol	Nucleotide and Its metabolomics	153	136	152.033426	Positive	[M+H]+	C5H4N4O2	N/A	N/A	N/A	N/A	N/A	N/A	N/A	N/A	N/A	N/A	N/A	N/A	N/A	N/A	N/A	N/A	N/A	N/A	N/A	N/A	C07599	HMDB0000786	2465-59-0	-
3-Phenylpyruvic-Acid	3-Phenylpyruvic Acid	Benzene and substituted derivatives	163.03952	119	164.047345	Negative	[M-H]-	C9H8O3	N/A	N/A	N/A	N/A	N/A	N/A	N/A	N/A	N/A	N/A	N/A	N/A	N/A	N/A	N/A	N/A	N/A	N/A	N/A	N/A	C00166	HMDB0000205	156-06-9	ko00360,ko00400,ko00470,ko01100,ko01210,ko01230
2'-deoxyguanosine	2'-deoxyguanosine	Nucleotide and Its metabolomics	266.2	150.2	267.096755	Negative	[M-H]-	C10H13N5O4	N/A	N/A	N/A	N/A	N/A	N/A	N/A	N/A	N/A	N/A	N/A	N/A	N/A	N/A	N/A	N/A	N/A	N/A	N/A	N/A	C00330	HMDB0000085	961-07-9	ko00230,ko01100,ko01232,ko02010
4-Hydroxyphenylpyruvic-Acid	4-Hydroxyphenylpyruvic Acid	Benzene and substituted derivatives	179.034435	92	180.04226	Negative	[M-H]-	C9H8O4	N/A	N/A	N/A	N/A	N/A	N/A	N/A	N/A	N/A	N/A	N/A	N/A	N/A	N/A	N/A	N/A	N/A	N/A	N/A	N/A	C01179	HMDB0000707	156-39-8	ko00130,ko00350,ko00400,ko01100,ko01210,ko01230,ko01240
P-Aminobenzoate	P-Aminobenzoate	Benzene and substituted derivatives	138	94.2	137.047679	Positive	[M+H]+	C7H7NO2	N/A	N/A	N/A	N/A	N/A	N/A	N/A	N/A	N/A	N/A	N/A	N/A	N/A	N/A	N/A	N/A	N/A	N/A	N/A	N/A	C00568	HMDB0001392	150-13-0	ko00790,ko01100,ko01240
3-hydroxyhippuric-acid	3-hydroxyhippuric acid	Benzene and substituted derivatives	196.05	121	195.053159	Positive	[M+H]+	C9H9NO4	N/A	N/A	N/A	N/A	N/A	N/A	N/A	N/A	N/A	N/A	N/A	N/A	N/A	N/A	N/A	N/A	N/A	N/A	N/A	N/A	-	HMDB0006116	1637-75-8	-
5'-deoxyadenosine	5'-deoxyadenosine	Nucleotide and Its metabolomics	252.1	136.1	251.10184	Positive	[M+H]+	C10H13N5O3	N/A	N/A	N/A	N/A	N/A	N/A	N/A	N/A	N/A	N/A	N/A	N/A	N/A	N/A	N/A	N/A	N/A	N/A	N/A	N/A	C05198	HMDB0001983	4754-39-6	-
3-Hydroxyanthranilic-Acid	3-Hydroxyanthranilic Acid	Benzene and substituted derivatives	152.034769	108	153.042594	Negative	[M-H]-	C7H7NO3	N/A	N/A	N/A	N/A	N/A	N/A	N/A	N/A	N/A	N/A	N/A	N/A	N/A	N/A	N/A	N/A	N/A	N/A	N/A	N/A	C00632	HMDB0001476	548-93-6	ko00380,ko01100,ko01240
8-hydroxyadenosine	8-hydroxyadenosine	Nucleotide and Its metabolomics	284.1	152.1	283.09167	Positive	[M+H]+	C10H13N5O5	N/A	N/A	N/A	N/A	N/A	N/A	N/A	N/A	N/A	N/A	N/A	N/A	N/A	N/A	N/A	N/A	N/A	N/A	N/A	N/A	-	-	29851-57-8	-
5-methoxycarbonylmethyluridine	5-methoxycarbonylmethyluridine	Nucleotide and Its metabolomics	317.1	185.1	316.090668	Positive	[M+H]+	C12H16N2O8	N/A	N/A	N/A	N/A	N/A	N/A	N/A	N/A	N/A	N/A	N/A	N/A	N/A	N/A	N/A	N/A	N/A	N/A	N/A	N/A	-	-	29428-50-0	-
N6,N6-dimethyladenosine	N6,N6-dimethyladenosine	Nucleotide and Its metabolomics	296.1	164.1	295.128055	Positive	[M+H]+	C12H17N5O4	N/A	N/A	N/A	N/A	N/A	N/A	N/A	N/A	N/A	N/A	N/A	N/A	N/A	N/A	N/A	N/A	N/A	N/A	N/A	N/A	C03416	-	2620-62-4	-
3-Hydroxybenzoic-acid	3-Hydroxybenzoic acid	Benzene and substituted derivatives	137.02	93.03	138.031695	Negative	[M-H]-	C7H6O3	N/A	N/A	N/A	N/A	N/A	N/A	N/A	N/A	N/A	N/A	N/A	N/A	N/A	N/A	N/A	N/A	N/A	N/A	N/A	N/A	-	HMDB0002466	99-06-9	-
3-Amino-4-hydroxybenzoate	3-Amino-4-hydroxybenzoate	Benzene and substituted derivatives	154.05	108.04	153.042594	Positive	[M+H]+	C7H7NO3	N/A	N/A	N/A	N/A	N/A	N/A	N/A	N/A	N/A	N/A	N/A	N/A	N/A	N/A	N/A	N/A	N/A	N/A	N/A	N/A	-	-	1571-72-8	-
2',4'-Dihydroxyacetophenone	2',4'-Dihydroxyacetophenone	Benzene and substituted derivatives	151.04	91.02	152.047345	Negative	[M-H]-	C8H8O3	N/A	N/A	N/A	N/A	N/A	N/A	N/A	N/A	N/A	N/A	N/A	N/A	N/A	N/A	N/A	N/A	N/A	N/A	N/A	N/A	-	HMDB0029659	89-84-9	-
1-Methylxanthine	1-Methylxanthine	Nucleotide and Its metabolomics	167.06	110.04	166.049076	Positive	[M+H]+	C6H6N4O2	N/A	N/A	N/A	N/A	N/A	N/A	N/A	N/A	N/A	N/A	N/A	N/A	N/A	N/A	N/A	N/A	N/A	N/A	N/A	N/A	C16358	HMDB0010738	6136-37-4	ko00232,ko01100
m-Aminobenzoic-acid	m-Aminobenzoic acid	Benzene and substituted derivatives	138.05	77.04	137.047679	Positive	[M+H]+	C7H7NO2	N/A	N/A	N/A	N/A	N/A	N/A	N/A	N/A	N/A	N/A	N/A	N/A	N/A	N/A	N/A	N/A	N/A	N/A	N/A	N/A	-	HMDB0001891	99-05-8	-
Pantothenol	Pantothenol	Alcohols and polyols	204	102	205.131409	Negative	[M-H]-	C9H19NO4	N/A	N/A	N/A	N/A	N/A	N/A	N/A	N/A	N/A	N/A	N/A	N/A	N/A	N/A	N/A	N/A	N/A	N/A	N/A	N/A	C05944	HMDB0004231	16485-10-2(81-13-0)	ko00770
